# Supplementary material
Source: PubMed Central journal article supplement (PMC10258821)
Supplement: ml3c00127_si_001.pdf [file ml3c00127_si_001.pdf]

# Supporting Information:

## Design and Synthesis of Pyrazole-based Macrocyclic Kinase Inhibitors targeting BMPR2

Jennifer A. Amrhein<sup>1,2</sup>, Guiqun Wang<sup>1,2,3</sup>, Benedict-Tilman Berger<sup>1,2</sup>, Lena M. Berger<sup>1,2</sup>, Amalia D. Kalampaliki<sup>4</sup>, Andreas Krämer<sup>1,2,3</sup>, Stefan Knapp<sup>1,2,3\*</sup>, Thomas Hanke<sup>1,2\*</sup>

<sup>1</sup>Institute for Pharmaceutical Chemistry, Johann Wolfgang Goethe-University, Max-von-Laue-Str. 9, D-60438 Frankfurt am Main, Germany

<sup>2</sup>Structure Genomics Consortium, Buchmann Institute for Molecular Life Sciences, Johann Wolfgang Goethe-University, Max-von-Laue-Str. 15, D-60438 Frankfurt am Main, Germany

<sup>3</sup>German Cancer Consortium (DKTK), German Cancer Research Center (DKFZ), DKTK site Frankfurt-Mainz, 69120 Heidelberg, Germany

<sup>4</sup>Division of Pharmaceutical Chemistry, Department of Pharmacy, National and Kapodistrian University of Athens, Panepistimiopolis, Zografou, 15771 Athens, Greece.

### Table of Content:

|                                          |     |
|------------------------------------------|-----|
| Supplementary Table <b>S1-S3</b>         | S2  |
| Experimental Section                     | S22 |
| Analytical data of compounds <b>4-8e</b> | S33 |
| References                               | S66 |

**Table S1:** DSF data from **8a-e, 1** and staurosporine (**9**) as a positive control against 90 kinases.

| 8a       |                   | 8b       |                   | 8c       |                   | 8d       |                   | 8e       |                   | 1        |                   | 9        |                   |
|----------|-------------------|----------|-------------------|----------|-------------------|----------|-------------------|----------|-------------------|----------|-------------------|----------|-------------------|
| Kinase   | $\Delta T_m$ [°C] |
| GSK3B    | 8.4               | BMP2K    | 11.2              | BMP2K    | 10.4              | BMP2K    | 5.7               | BMP2K    | 7.9               | BMP2K    | 18.8              | CAMKK2B  | 24.6              |
| BMP2K    | 5.8               | STK3     | 7.2               | STK3     | 8.4               | GSK3B    | 4.9               | GSK3B    | 6.8               | MAPK15   | 17.4              | STK10    | 23.3              |
| BMPR2    | 5.3               | GSK3B    | 7.2               | STK4     | 6.5               | STK3     | 4.0               | STK3     | 5.8               | ULK3     | 15.5              | PHKG2    | 21.2              |
| FLT1     | 4.8               | RIOK1    | 6.8               | MELK     | 6.2               | MELK     | 3.9               | MST3     | 4.9               | CDK2     | 15.2              | PIM3     | 19.7              |
| MARK3    | 4.2               | MELK     | 6.6               | RIOK1    | 5.9               | CLK1     | 3.0               | STK4     | 4.8               | STK6     | 14.3              | ULK3     | 19.6              |
| MARK4    | 3.9               | AAK1     | 6.6               | MARK3    | 5.4               | MARK4    | 2.9               | RIOK1    | 3.7               | GSK3B    | 14.0              | BMP2K    | 19.1              |
| MAPK15   | 3.8               | GAK      | 6.3               | MAPK15   | 5.3               | FLT1     | 2.6               | CDK2     | 3.7               | AAK1     | 13.8              | MARK3    | 19.0              |
| CDK2     | 3.8               | STK6     | 6.3               | CLK1     | 5.2               | MAPK15   | 2.5               | PIM1     | 3.4               | CLK1     | 12.2              | MAP3K5   | 18.5              |
| STK4     | 3.3               | ULK3     | 5.9               | ULK3     | 5.1               | MARK3    | 2.4               | ULK3     | 3.3               | CAMKK2B  | 12.0              | SLK      | 18.0              |
| MST3     | 3.2               | MARK4    | 5.4               | MARK4    | 5.1               | AAK1     | 2.2               | AAK1     | 3.2               | MAP3K5   | 12.0              | STK6     | 17.1              |
| MERTK    | 3.2               | MAPK15   | 5.4               | GSK3B    | 4.9               | FGFR3    | 2.2               | MARK4    | 3.2               | STK3     | 11.6              | CHEK2    | 17.1              |
| ULK3     | 2.9               | CDK2     | 5.3               | AAK1     | 4.9               | DYRK2    | 2.1               | PCTK1    | 3.1               | CLK3     | 11.3              | STK3     | 16.6              |
| CAMK1D   | 2.7               | CLK1     | 5.3               | BMPR2    | 4.6               | RIOK1    | 2.1               | STK17B   | 2.9               | PLK4     | 11.1              | MARK4    | 16.4              |
| MAP2K4   | 2.6               | SLK      | 5.2               | CDK2     | 4.4               | BMPR2    | 2.0               | BMPR2    | 2.8               | DYRK2    | 11.0              | CAMK2D   | 16.2              |
| MAPK10   | 2.6               | STK4     | 5.0               | MST3     | 4.3               | GSG2     | 1.9               | MAPK15   | 2.8               | FLT1     | 10.6              | PLK4     | 16.0              |
| PCTK1    | 2.6               | FLT1     | 5.0               | STK39    | 3.7               | SLK      | 1.9               | STK39    | 2.7               | MAP2K6   | 10.4              | DAPK3    | 15.8              |
| PIM1     | 2.3               | BMPR2    | 5.0               | STK17B   | 3.7               | STK4     | 1.9               | MST4     | 2.7               | PCTK1    | 10.3              | AAK1     | 15.6              |
| FGFR2    | 2.2               | STK17A   | 4.9               | FLT1     | 3.7               | ULK3     | 1.7               | MAPK10   | 2.5               | STK10    | 10.1              | CDK2     | 15.5              |
| AAK1     | 2.2               | MARK3    | 4.9               | ULK1     | 3.6               | BRAF     | 1.7               | CHEK2    | 2.4               | MAP2K4   | 10.0              | STK4     | 14.9              |
| CHEK2    | 2.2               | CK2A2    | 4.8               | DYRK2    | 3.6               | STK39    | 1.7               | GAK      | 2.2               | MELK     | 9.8               | MAPK15   | 14.7              |
| FGFR3    | 2.1               | DAPK3    | 4.4               | GAK      | 3.6               | CDK2     | 1.7               | CLK1     | 2.2               | FGFR3    | 9.8               | MELK     | 13.8              |
| MELK     | 2.0               | GSG2     | 4.4               | SLK      | 3.5               | CSNK1D   | 1.7               | FLT1     | 2.2               | STK17B   | 9.7               | FLT1     | 13.6              |
| GAK      | 2.0               | MAP2K4   | 4.1               | FGFR3    | 3.5               | CLK3     | 1.6               | MELK     | 2.1               | DAPK3    | 9.7               | CAMK2B   | 13.3              |
| VRK1     | 2.0               | STK39    | 4.1               | BRAF     | 3.2               | MAP3K5   | 1.6               | MAP2K4   | 1.9               | STK17A   | 9.6               | FGFR3    | 13.3              |
| RIOK1    | 2.0               | DYRK2    | 4.0               | MAP3K5   | 3.1               | CK2A2    | 1.5               | CLK3     | 1.6               | STK4     | 9.6               | STK38L   | 12.6              |
| CAMK1G   | 2.0               | FGFR3    | 3.8               | VRK1     | 3.0               | ULK1     | 1.4               | DYRK1A   | 1.5               | MST3     | 9.3               | PIM1     | 12.5              |
| CAMKK2B  | 1.9               | PLK4     | 3.8               | MST4     | 3.0               | FGFR2    | 1.1               | FES      | 1.5               | BMPR2    | 9.2               | DCAMKL1  | 12.4              |
| STK3     | 1.8               | CAMKK2B  | 3.7               | MAP2K4   | 2.9               | MAP2K4   | 1.1               | PDK4     | 1.5               | DCAMKL1  | 8.9               | MAP2K6   | 12.3              |
| SLK      | 1.8               | MST3     | 3.7               | GSG2     | 2.9               | STK17B   | 1.1               | STK17A   | 1.4               | PHKG2    | 8.8               | PAK4     | 12.2              |
| DYRK1A   | 1.7               | CHEK2    | 3.5               | STK17A   | 2.9               | PCTK1    | 1.1               | GSG2     | 1.4               | TTK      | 8.8               | MAP2K4   | 12.0              |
| EPHA7    | 1.7               | EPHA5    | 3.2               | CLK3     | 2.8               | GPRK5    | 1.0               | ULK1     | 1.3               | SLK      | 8.8               | CLK1     | 11.9              |
| CLK1     | 1.6               | ABL1     | 3.2               | CK2A2    | 2.7               | STK17A   | 1.0               | STK6     | 1.3               | STK38L   | 8.7               | STK17A   | 11.8              |
| DYRK2    | 1.6               | EPHA2    | 3.1               | STK6     | 2.7               | GAK      | 1.0               | MAP3K5   | 1.3               | ABL1     | 8.7               | GSK3B    | 11.8              |
| CAMK2D   | 1.6               | CLK3     | 3.0               | CHEK2    | 2.6               | MERTK    | 1.0               | TTK      | 1.3               | CHEK2    | 8.6               | STK17B   | 11.5              |
| PHKG2    | 1.5               | MAPK10   | 3.0               | PCTK1    | 2.6               | MST3     | 0.9               | MERTK    | 1.2               | MAPK1    | 8.5               | ULK1     | 11.3              |
| STK17B   | 1.5               | PCTK1    | 3.0               | PIM3     | 2.3               | RPS6KA1  | 0.9               | OSR1     | 1.2               | CK2A2    | 8.5               | TTK      | 11.2              |
| CLK3     | 1.5               | CAMK1D   | 3.0               | FGFR2    | 2.3               | CHEK2    | 0.9               | FGFR2    | 1.1               | EPHA2    | 8.4               | CAMK1G   | 10.9              |
| MAPK9    | 1.5               | SRC      | 2.9               | RPS6KA1  | 2.2               | FGFR1B   | 0.9               | FGFR3    | 1.1               | ULK1     | 8.3               | EPHA7    | 10.3              |
| CSNK1D   | 1.5               | STK17B   | 2.8               | PIM1     | 2.1               | PDK4     | 0.8               | STK10    | 1.1               | MARK4    | 8.2               | ABL1     | 10.3              |
| FGFR1B   | 1.4               | ULK1     | 2.8               | CSNK1D   | 2.1               | VRK1     | 0.8               | GPRK5    | 1.1               | DYRK1A   | 8.2               | CAMK1D   | 10.0              |
| TTK      | 1.4               | STK10    | 2.6               | MAPK10   | 1.9               | CAMK2B   | 0.7               | MAP2K6   | 1.1               | MARK3    | 8.1               | DAPK1    | 9.8               |
| STK17A   | 1.4               | DYRK1A   | 2.6               | PLK4     | 1.9               | EPHA7    | 0.7               | CAMK2D   | 1.1               | MAPK13   | 8.0               | STK39    | 9.6               |
| STK6     | 1.3               | DCAMKL1  | 2.6               | MERTK    | 1.8               | STK6     | 0.7               | PKMYT1   | 1.1               | GAK      | 8.0               | PCTK1    | 9.1               |
| STK38L   | 1.3               | FES      | 2.5               | PHKG2    | 1.8               | PLK4     | 0.6               | MAPK9    | 1.1               | PAK4     | 7.7               | FGFR2    | 9.0               |
| STK39    | 1.2               | PIM3     | 2.5               | ABL1     | 1.6               | DYRK1A   | 0.6               | PIM3     | 1.1               | STK39    | 7.6               | GAK      | 9.0               |
| WNK1     | 1.2               | FGFR2    | 2.5               | FES      | 1.6               | MST4     | 0.6               | DYRK2    | 1.1               | MAPK10   | 7.2               | DYRK1A   | 8.7               |
| FES      | 1.2               | MERTK    | 2.5               | STK38L   | 1.6               | CAMK2D   | 0.6               | CK2A2    | 1.0               | MST4     | 7.1               | DMPK1    | 8.7               |
| CAMK2B   | 1.1               | PIM1     | 2.4               | FGFR1B   | 1.6               | WNK1     | 0.5               | DAPK3    | 0.9               | CDKL1    | 6.8               | CAMK4    | 8.6               |
| MST4     | 1.1               | STK38L   | 2.4               | CAMKK2B  | 1.6               | MAP2K6   | 0.5               | VRK1     | 0.9               | MAPK9    | 6.5               | EPHA2    | 8.3               |
| BRAF     | 1.1               | OSR1     | 2.3               | GPRK5    | 1.4               | FES      | 0.5               | SRPK1    | 0.9               | EPHA5    | 6.3               | EPHA5    | 7.9               |
| ULK1     | 1.1               | DAPK1    | 2.3               | CAMK2D   | 1.4               | STK38L   | 0.5               | CAMK1D   | 0.9               | VRK1     | 5.9               | GPRK5    | 7.7               |
| BRD4     | 1.0               | MAPK9    | 2.3               | MAP2K6   | 1.3               | DAPK1    | 0.5               | MARK3    | 0.9               | FGFR2    | 5.9               | OSR1     | 7.7               |
| EPHB3    | 0.9               | MST4     | 2.3               | SRC      | 1.2               | DAPK3    | 0.5               | BMX      | 0.8               | OSR1     | 5.6               | MAPK13   | 7.5               |
| GSG2     | 0.9               | MAP2K6   | 2.3               | DAPK1    | 1.2               | SRC      | 0.4               | STK38L   | 0.8               | CAMK1G   | 5.5               | MAPK10   | 7.4               |
| MAP3K5   | 0.9               | MAPK13   | 2.2               | OSR1     | 1.2               | OSR1     | 0.4               | EPHB3    | 0.8               | CAMK1D   | 5.4               | MST3     | 7.3               |
| MAP2K1   | 0.9               | MAP3K5   | 2.1               | EPHA2    | 1.1               | NEK1     | 0.4               | PLK4     | 0.8               | CAMK4    | 5.4               | GSG2     | 7.2               |
| PAK1     | 0.9               | BRAF     | 2.1               | DCAMKL1  | 1.1               | MAPK13   | 0.4               | CAMKK2B  | 0.8               | GPRK5    | 5.2               | BMX      | 7.1               |
| PDK4     | 0.8               | PHKG2    | 2.1               | STK10    | 1.1               | EPHB3    | 0.4               | DMPK1    | 0.8               | RPS6KA1  | 5.1               | DYRK2    | 7.0               |
| SRPK1    | 0.8               | BMX      | 2.1               | MAPK13   | 1.1               | MAPK9    | 0.3               | PAK1     | 0.7               | EPHB3    | 5.1               | SRPK1    | 6.9               |
| PLK4     | 0.7               | TTK      | 2.0               | PDK4     | 1.1               | PIM3     | 0.3               | DCAMKL1  | 0.7               | DAPK1    | 4.9               | PAK1     | 6.6               |
| MAP2K6   | 0.7               | PAK4     | 1.9               | CAMK2B   | 1.1               | PKMYT1   | 0.3               | EPHA2    | 0.7               | EPHA7    | 4.9               | MERTK    | 6.6               |
| CK2A2    | 0.7               | CAMK1G   | 1.9               | MAPK9    | 1.0               | EPHA2    | 0.2               | BRAF     | 0.7               | RIOK1    | 4.9               | AKT3     | 6.6               |
| PKMYT1   | 0.7               | CSNK1D   | 1.8               | BRD4     | 1.0               | ABL1     | 0.2               | EPHA7    | 0.7               | BRAF     | 4.6               | FES      | 6.2               |
| ABL1     | 0.5               | VRK1     | 1.8               | TTK      | 0.9               | BRD4     | 0.2               | WNK1     | 0.7               | FGFR1B   | 4.5               | MST4     | 6.1               |
| DAPK3    | 0.5               | FGFR1B   | 1.8               | PAK4     | 0.9               | MAPK1    | 0.2               | SLK      | 0.7               | FES      | 4.5               | FGFR1B   | 5.9               |
| DMPK1    | 0.5               | EPHB3    | 1.7               | EPHB3    | 0.7               | BMX      | 0.1               | SRC      | 0.6               | CAMK2D   | 4.5               | SRC      | 5.9               |
| DAPK1    | 0.5               | RPS6KA1  | 1.7               | BMX      | 0.7               | RPS6KA6  | 0.1               | FGFR1B   | 0.6               | SRC      | 4.4               | CK2A2    | 5.6               |
| CDC42BPA | 0.5               | PKMYT1   | 1.6               | DAPK3    | 0.7               | CAMKK2B  | 0.1               | DAPK1    | 0.6               | BMX      | 4.4               | CLK3     | 5.6               |
| BMX      | 0.4               | GPRK5    | 1.5               | DYRK1A   | 0.7               | CASK     | 0.1               | ABL1     | 0.5               | CAMK2B   | 4.4               | EPHB3    | 5.0               |
| MAPK13   | 0.3               | EPHA7    | 1.4               | DMPK1    | 0.7               | PAK4     | 0.1               | EPHA5    | 0.5               | MERTK    | 4.4               | CASK     | 4.8               |
| RPS6KA1  | 0.3               | DMPK1    | 1.4               | SRPK1    | 0.6               | PHKG2    | 0.1               | CSNK1D   | 0.5               | SRPK1    | 4.1               | RPS6KA1  | 3.9               |
| MAPK1    | 0.3               | CAMK2B   | 1.3               | NEK1     | 0.6               | CAMK4    | 0.0               | AKT3     | 0.5               | PIM3     | 3.8               | MAPK9    | 3.7               |
| AKT3     | 0.3               | PDK4     | 1.2               | PKMYT1   | 0.5               | PAK1     | 0.0               | CAMK2B   | 0.4               | PAK1     | 3.3               | CDKL1    | 3.1               |
| TAF1     | 0.3               | CAMK2D   | 1.2               | MAPK1    | 0.5               | DMPK1    | 0.0               | MAP2K1   | 0.4               | PIM1     | 3.3               | CDC42BPA | 2.8               |
| CAMK4    | 0.2               | CAMK4    | 1.1               | WNK1     | 0.4               | SRPK1    | 0.0               | MAPK13   | 0.4               | DMPK1    | 3.2               | VRK1     | 2.8               |
| EPHA5    | 0.2               | BRD4     | 0.9               | PAK1     | 0.4               | AKT3     | 0.0               | MAPK1    | 0.3               | CSNK1D   | 3.1               | BMPR2    | 2.6               |
| EPHA2    | 0.2               | SRPK1    | 0.8               | TAF1     | 0.3               | TAF1     | 0.3               | CDC42BPA | 0.3               | GSG2     | 2.9               | CSNK1D   | 1.8               |
| STK10    | 0.2               | WNK1     | 0.7               | CAMK4    | 0.3               | TTK      | -0.1              | CASK     | 0.2               | MAPK14   | 2.5               | MAPK1    | 1.4               |
| NEK1     | 0.1               | NEK1     | 0.7               | CDKL1    | 0.2               | STK10    | -0.1              | CDKL1    | 0.2               | CASK     | 2.0               | MAP2K1   | 1.3               |
| SRC      | 0.1               | PAK1     | 0.7               | CASK     | 0.2               | CAMK1G   | -0.3              | PHKG2    | 0.1               | MAP2K1   | 1.4               | BRD4     | 1.1               |
| DCAMKL1  | 0.1               | MAPK1    | 0.7               | MAP2K1   | 0.1               | DCAMKL1  | -0.3              | RPS6KA1  | 0.1               | AKT3     | 1.4               | WNK1     | 0.9               |
| OSR1     | 0.1               | CASK     | 0.4               | CAMK1G   | 0.1               | CDKL1    | -0.3              | BRD4     | 0.1               | BRD4     | 1.3               | BRAF     | 0.8               |
| CDKL1    | 0.1               | AKT3     | 0.4               | EPHA5    | 0.1               | PIM1     | -0.3              | RPS6KA6  | 0.1               | PDK4     | 1.2               | MAPK14   | 0.3               |
| PIM3     | 0.1               | TAF1     | 0.3               | AKT3     | -0.1              | MAPK14   | -0.3              | TAF1     | 0.1               | NEK1     | 1.1               | PDK4     | 0.2               |
| CASK     | 0.0               | CDC42BPA | 0.3               | CDC42BPA | -0.2              | EPHA5    | -0.3              | PAK4     | 0.1               | WNK1     | 1.1               | PKMYT1   | 0.2               |
| PAK4     | 0.0               | RPS6KA6  | 0.3               | MAPK14   | -0.2              | CDC42BPA | -0.4              | CAMK4    | 0.1               | PKMYT1   | 1.0               | TAF1     | 0.2               |
| MAPK14   | -0.1              | CDKL1    | 0.2               | RPS6KA6  | -0.4              | MAP2K1   | -0.4              | NEK1     | 0.0               | RPS6KA6  | 0.4               | RIOK1    | 0.0               |
| GPRK5    | -0.2              | MAP2K1   | 0.0               | EPHA7    | -0.5              | MAPK10   | -0.8              | MAPK14   | -0.1              | TAF1     | 0.1               | RPS6KA6  | -0.5              |
| RPS6KA6  | -0.3              | MAPK14   | 0.0               | CAMK1D   | -0.6              | CAMK1D   | -1.6              | CAMK1G   | -0.6              | CDC42BPA | -0.1              | NEK1     | -0.6              |

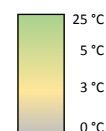

**Table S2.** Selectivity screening results of **8a** at 1  $\mu$ M screening concentration.

| Kinase                     | Percent Control |
|----------------------------|-----------------|
| FLT3(D835V)                | 4.5             |
| BMP2                       | 8.3             |
| GSK3A                      | 16              |
| JNK1                       | 27              |
| RIOK2                      | 27              |
| FLT3(ITD,F691L)            | 37              |
| JNK3                       | 38              |
| PIP5K1C                    | 39              |
| RSK4(Kin.Dom.1-N-terminal) | 42              |
| VRK2                       | 44              |
| FLT3(ITD,D835V)            | 46              |
| STK16                      | 46              |
| FLT3(D835H)                | 47              |
| FLT3(N841I)                | 50              |
| ERBB2                      | 52              |
| YSK4                       | 52              |
| PIP5K2C                    | 53              |
| PCK1                       | 54              |
| CDK4-cyclinD1              | 57              |
| MYLK                       | 58              |
| BRSK2                      | 59              |
| CDK4-cyclinD3              | 59              |
| PAK6                       | 59              |
| AMPK-alpha1                | 60              |

|                               |    |
|-------------------------------|----|
| EGFR(S752-I759del)            | 60 |
| FGFR1                         | 60 |
| PIK3CA(H1047Y)                | 60 |
| CSNK1E                        | 61 |
| MARK4                         | 61 |
| MARK1                         | 62 |
| MTOR                          | 62 |
| BRAF(V600E)                   | 63 |
| IRAK1                         | 63 |
| MET                           | 63 |
| RAF1                          | 63 |
| TBK1                          | 63 |
| TSSK1B                        | 64 |
| WNK4                          | 64 |
| BMPR1A                        | 65 |
| RPS6KA5(Kin.Dom.2-C-terminal) | 65 |
| TSSK3                         | 65 |
| BLK                           | 66 |
| CAMK2B                        | 66 |
| CDC2L5                        | 66 |
| IRAK4                         | 66 |
| PRKCD                         | 66 |
| SYK                           | 66 |
| CIT                           | 67 |
| CSNK1D                        | 67 |
| DYRK1A                        | 67 |

|                                  |    |
|----------------------------------|----|
| HIPK1                            | 67 |
| ICK                              | 67 |
| JNK2                             | 67 |
| PRKCE                            | 67 |
| EGFR(L747-T751del,Sins)          | 68 |
| EPHB6                            | 68 |
| MLK1                             | 68 |
| PIK3C2G                          | 68 |
| SLK                              | 68 |
| TYK2(JH2domain-<br>pseudokinase) | 68 |
| FLT3(K663Q)                      | 69 |
| GRK3                             | 69 |
| MYLK2                            | 69 |
| p38-beta                         | 69 |
| PDPK1                            | 69 |
| PIK3CD                           | 69 |
| TEC                              | 69 |
| ABL1-phosphorylated              | 70 |
| EGFR(G719S)                      | 70 |
| LKB1                             | 70 |
| p38-gamma                        | 70 |
| PKN2                             | 70 |
| RSK1(Kin.Dom.1-N-terminal)       | 70 |
| CSNK1G2                          | 71 |
| EGFR(G719C)                      | 71 |
| EPHA7                            | 71 |

|                        |    |
|------------------------|----|
| ERK8                   | 71 |
| MEK5                   | 71 |
| PIK3CA(E545A)          | 71 |
| PIK3CG                 | 71 |
| PIK4CB                 | 71 |
| TAOK2                  | 71 |
| ABL1-nonphosphorylated | 72 |
| CLK4                   | 72 |
| MEK3                   | 72 |
| NIK                    | 72 |
| SGK2                   | 72 |
| ABL2                   | 73 |
| AMPK-alpha2            | 73 |
| CAMK2A                 | 73 |
| CAMK2G                 | 73 |
| CSK                    | 73 |
| DAPK2                  | 73 |
| ERK1                   | 73 |
| MLK3                   | 73 |
| MYO3B                  | 73 |
| PIK3CA(M1043I)         | 73 |
| PKNB(M.tuberculosis)   | 73 |
| SGK                    | 73 |
| STK36                  | 73 |
| TAOK3                  | 73 |
| TIE2                   | 73 |
| PRKD1                  | 74 |

|                              |    |
|------------------------------|----|
| BUB1                         | 75 |
| CDK2                         | 75 |
| CSNK2A1                      | 75 |
| DCAMKL3                      | 75 |
| PIM1                         | 75 |
| SNARK                        | 75 |
| TAK1                         | 75 |
| YSK1                         | 75 |
| AAK1                         | 76 |
| ACVR1B                       | 76 |
| ACVRL1                       | 76 |
| DYRK1B                       | 76 |
| EGFR(L747-E749del,<br>A750P) | 76 |
| JAK3(JH1domain-catalytic)    | 76 |
| MAP3K2                       | 76 |
| MAP3K3                       | 76 |
| MYLK4                        | 76 |
| PKAC-alpha                   | 76 |
| PRKCI                        | 76 |
| RSK2(Kin.Dom.1-N-terminal)   | 76 |
| CAMK1G                       | 77 |
| CDK5                         | 77 |
| DAPK3                        | 77 |
| HCK                          | 77 |
| MAP3K15                      | 77 |
| p38-alpha                    | 77 |

|                                |    |
|--------------------------------|----|
| PHKG2                          | 77 |
| PIK3CA                         | 77 |
| PIM3                           | 77 |
| ABL1(E255K)-<br>phosphorylated | 78 |
| CDKL5                          | 78 |
| CTK                            | 78 |
| FLT3                           | 78 |
| LCK                            | 78 |
| MELK                           | 78 |
| MKNK2                          | 78 |
| MST4                           | 78 |
| MYO3A                          | 78 |
| SIK                            | 78 |
| AKT1                           | 79 |
| CAMK1                          | 79 |
| CDK8                           | 79 |
| CSNK1A1L                       | 79 |
| GRK2                           | 79 |
| OSR1                           | 79 |
| PAK4                           | 79 |
| PFCDPK1(P.falciparum)          | 79 |
| PIK3CA(C420R)                  | 79 |
| RET(V804L)                     | 79 |
| TAOK1                          | 79 |
| TGFBR1                         | 79 |
| YANK3                          | 79 |



|                               |    |
|-------------------------------|----|
| CSNK1A1                       | 80 |
| EPHA5                         | 80 |
| FLT4                          | 80 |
| GSK3B                         | 80 |
| HASPIN                        | 80 |
| ITK                           | 80 |
| KIT(V559D,V654A)              | 80 |
| MEK6                          | 80 |
| NEK6                          | 80 |
| PIK3C2B                       | 80 |
| RET(M918T)                    | 80 |
| ANKK1                         | 81 |
| AXL                           | 81 |
| FLT1                          | 81 |
| LYN                           | 81 |
| MAP3K1                        | 81 |
| MINK                          | 81 |
| PAK3                          | 81 |
| PCK2                          | 81 |
| PIK3CA(H1047L)                | 81 |
| RPS6KA5(Kin.Dom.1-N-terminal) | 81 |
| ULK1                          | 81 |
| EPHA8                         | 82 |
| LZK                           | 82 |
| MET(M1250T)                   | 82 |
| SRC                           | 82 |

|                                   |    |
|-----------------------------------|----|
| VEGFR2                            | 82 |
| ABL1(T315I)-phosphorylated        | 83 |
| AKT3                              | 83 |
| CAMKK2                            | 83 |
| EGFR(L861Q)                       | 83 |
| IGF1R                             | 83 |
| KIT(D816V)                        | 83 |
| MST1R                             | 83 |
| MST3                              | 83 |
| SgK110                            | 83 |
| TLK2                              | 83 |
| CDK9                              | 84 |
| FLT3(ITD)                         | 84 |
| LATS1                             | 84 |
| MAP4K5                            | 84 |
| NDR2                              | 84 |
| PDGFRA                            | 84 |
| PRKCH                             | 84 |
| RET                               | 84 |
| RIPK1                             | 84 |
| ROCK1                             | 84 |
| TNNI3K                            | 84 |
| ABL1(F317L)-<br>phosphorylated    | 85 |
| ABL1(Q252H)-<br>nonphosphorylated | 85 |
| EGFR(E746-A750del)                | 85 |

|                               |    |
|-------------------------------|----|
| ERK2                          | 85 |
| LIMK2                         | 85 |
| LOK                           | 85 |
| MAPKAPK5                      | 85 |
| PRKR                          | 85 |
| RPS6KA4(Kin.Dom.2-C-terminal) | 85 |
| TGFBR2                        | 85 |
| ULK3                          | 85 |
| WEE2                          | 85 |
| ACVR2A                        | 86 |
| ASK1                          | 86 |
| BIKE                          | 86 |
| CAMK1D                        | 86 |
| CAMK2D                        | 86 |
| CDC2L2                        | 86 |
| CLK1                          | 86 |
| CSF1R                         | 86 |
| CSF1R-autoinhibited           | 86 |
| FER                           | 86 |
| FLT3-autoinhibited            | 86 |
| JAK1(JH1domain-catalytic)     | 86 |
| KIT(D816H)                    | 86 |
| ROS1                          | 86 |
| AKT2                          | 87 |
| EGFR(L747-S752del,<br>P753S)  | 87 |

|                                   |    |
|-----------------------------------|----|
| EGFR(L858R,T790M)                 | 87 |
| EPHB2                             | 87 |
| ERN1                              | 87 |
| IKK-beta                          | 87 |
| KIT                               | 87 |
| LIMK1                             | 87 |
| MERTK                             | 87 |
| MST1                              | 87 |
| NEK7                              | 87 |
| PAK1                              | 87 |
| PYK2                              | 87 |
| ABL1(H396P)-<br>nonphosphorylated | 88 |
| ABL1(H396P)-<br>phosphorylated    | 88 |
| CAMKK1                            | 88 |
| CLK3                              | 88 |
| DMPK2                             | 88 |
| DRAK1                             | 88 |
| ERK5                              | 88 |
| FGFR3                             | 88 |
| FGFR3(G697C)                      | 88 |
| FGFR4                             | 88 |
| INSR                              | 88 |
| MAP4K2                            | 88 |
| NEK3                              | 88 |
| PLK1                              | 88 |

|                                |    |
|--------------------------------|----|
| QSK                            | 88 |
| RSK3(Kin.Dom.1-N-terminal)     | 88 |
| ADCK4                          | 89 |
| AURKC                          | 89 |
| CDKL2                          | 89 |
| CLK2                           | 89 |
| EPHA2                          | 89 |
| GCN2(Kin.Dom.2,S808G)          | 89 |
| HIPK3                          | 89 |
| HPK1                           | 89 |
| KIT(V559D,T670I)               | 89 |
| MKNK1                          | 89 |
| PAK2                           | 89 |
| PFPK5(P.falciparum)            | 89 |
| PRKCQ                          | 89 |
| RIPK2                          | 89 |
| RSK3(Kin.Dom.2-C-terminal)     | 89 |
| TRKA                           | 89 |
| TRPM6                          | 89 |
| WNK2                           | 89 |
| ABL1(M351T)-<br>phosphorylated | 90 |
| CDK11                          | 90 |
| CSNK1G3                        | 90 |
| DAPK1                          | 90 |
| EPHB1                          | 90 |
| MET(Y1235D)                    | 90 |

|                            |    |
|----------------------------|----|
| NEK9                       | 90 |
| NIM1                       | 90 |
| NLK                        | 90 |
| PIK3CA(E542K)              | 90 |
| PRKG1                      | 90 |
| RSK1(Kin.Dom.2-C-terminal) | 90 |
| TTK                        | 90 |
| ACVR2B                     | 91 |
| BMPR1B                     | 91 |
| CDK3                       | 91 |
| MKK7                       | 91 |
| MST2                       | 91 |
| NDR1                       | 91 |
| NEK1                       | 91 |
| NEK5                       | 91 |
| PIKFYVE                    | 91 |
| S6K1                       | 91 |
| TLK1                       | 91 |
| ULK2                       | 91 |
| CHEK2                      | 92 |
| DDR2                       | 92 |
| FGFR2                      | 92 |
| IRAK3                      | 92 |
| JAK2(JH1domain-catalytic)  | 92 |
| PCK3                       | 92 |
| PIP5K2B                    | 92 |
| BMX                        | 93 |

|                               |    |
|-------------------------------|----|
| CHEK1                         | 93 |
| DCAMKL2                       | 93 |
| FYN                           | 93 |
| KIT(A829P)                    | 93 |
| KIT-autoinhibited             | 93 |
| MEK1                          | 93 |
| MRCKA                         | 93 |
| PFTAIRE2                      | 93 |
| PIM2                          | 93 |
| RPS6KA4(Kin.Dom.1-N-terminal) | 93 |
| SRPK1                         | 93 |
| STK35                         | 93 |
| GRK1                          | 94 |
| GRK4                          | 94 |
| IKK-epsilon                   | 94 |
| KIT(L576P)                    | 94 |
| MAP4K4                        | 94 |
| PIK3CA(E545K)                 | 94 |
| PLK4                          | 94 |
| RET(V804M)                    | 94 |
| RIPK4                         | 94 |
| SIK2                          | 94 |
| SRMS                          | 94 |
| STK33                         | 94 |
| TIE1                          | 94 |
| VPS34                         | 94 |

|                                |    |
|--------------------------------|----|
| WEE1                           | 94 |
| ACVR1                          | 95 |
| BRSK1                          | 95 |
| CDC2L1                         | 95 |
| CDKL1                          | 95 |
| EGFR                           | 95 |
| ERBB3                          | 95 |
| GAK                            | 95 |
| PDGFRB                         | 95 |
| PIK3CA(I800L)                  | 95 |
| ABL1(Y253F)-<br>phosphorylated | 96 |
| DRAK2                          | 96 |
| EGFR(L858R)                    | 96 |
| EPHA4                          | 96 |
| MAK                            | 96 |
| NEK11                          | 96 |
| PRKD3                          | 96 |
| PRKG2                          | 96 |
| TESK1                          | 96 |
| TNK1                           | 96 |
| TRKC                           | 96 |
| EGFR(T790M)                    | 97 |
| ERK3                           | 97 |
| GRK7                           | 97 |
| IKK-alpha                      | 97 |
| KIT(V559D)                     | 97 |



|                                   |     |
|-----------------------------------|-----|
| PAK7                              | 97  |
| PRKD2                             | 97  |
| TNIK                              | 97  |
| ADCK3                             | 98  |
| EPHA3                             | 98  |
| MARK3                             | 98  |
| MAST1                             | 98  |
| PIP5K1A                           | 98  |
| TNK2                              | 98  |
| EPHB4                             | 99  |
| MAP3K4                            | 99  |
| MAPKAPK2                          | 99  |
| MRCKB                             | 99  |
| PKN1                              | 99  |
| ZAP70                             | 99  |
| ABL1(F317I)-<br>nonphosphorylated | 100 |
| ABL1(F317I)-phosphorylated        | 100 |
| ABL1(F317L)-<br>nonphosphorylated | 100 |
| ABL1(Q252H)-<br>phosphorylated    | 100 |
| ABL1(T315I)-<br>nonphosphorylated | 100 |
| ALK                               | 100 |
| ALK(C1156Y)                       | 100 |
| ALK(L1196M)                       | 100 |

|         |     |
|---------|-----|
| ARK5    | 100 |
| ASK2    | 100 |
| AURKA   | 100 |
| AURKB   | 100 |
| BRAF    | 100 |
| BRK     | 100 |
| BTK     | 100 |
| CAMK1B  | 100 |
| CAMK4   | 100 |
| CASK    | 100 |
| CDK4    | 100 |
| CDK7    | 100 |
| CDKL3   | 100 |
| CSNK1G1 | 100 |
| CSNK2A2 | 100 |
| DCAMKL1 | 100 |
| DDR1    | 100 |
| DLK     | 100 |
| DMPK    | 100 |
| DYRK2   | 100 |
| EIF2AK1 | 100 |
| EPHA1   | 100 |
| EPHA6   | 100 |
| EPHB3   | 100 |
| ERBB4   | 100 |
| ERK4    | 100 |
| FAK     | 100 |

|                                  |     |
|----------------------------------|-----|
| FES                              | 100 |
| FGR                              | 100 |
| FLT3(D835Y)                      | 100 |
| FLT3(R834Q)                      | 100 |
| FRK                              | 100 |
| HIPK2                            | 100 |
| HIPK4                            | 100 |
| HUNK                             | 100 |
| INSRR                            | 100 |
| JAK1(JH2domain-<br>pseudokinase) | 100 |
| LATS2                            | 100 |
| LRRK2                            | 100 |
| LRRK2(G2019S)                    | 100 |
| LTK                              | 100 |
| MAP4K3                           | 100 |
| MARK2                            | 100 |
| MEK2                             | 100 |
| MEK4                             | 100 |
| MLCK                             | 100 |
| MLK2                             | 100 |
| MUSK                             | 100 |
| NEK10                            | 100 |
| NEK2                             | 100 |
| NEK4                             | 100 |
| p38-delta                        | 100 |
| PFTK1                            | 100 |

|                            |     |
|----------------------------|-----|
| PHKG1                      | 100 |
| PIK3CA(Q546K)              | 100 |
| PIK3CB                     | 100 |
| PKAC-beta                  | 100 |
| PKMYT1                     | 100 |
| PLK2                       | 100 |
| PLK3                       | 100 |
| PRKX                       | 100 |
| PRP4                       | 100 |
| RIOK1                      | 100 |
| RIOK3                      | 100 |
| RIPK5                      | 100 |
| ROCK2                      | 100 |
| RSK2(Kin.Dom.2-C-terminal) | 100 |
| RSK4(Kin.Dom.2-C-terminal) | 100 |
| SBK1                       | 100 |
| SGK3                       | 100 |
| SNRK                       | 100 |
| SRPK2                      | 100 |
| SRPK3                      | 100 |
| STK39                      | 100 |
| TRKB                       | 100 |
| TXK                        | 100 |
| TYK2(JH1domain-catalytic)  | 100 |
| TYRO3                      | 100 |
| WNK1                       | 100 |
| WNK3                       | 100 |

|       |     |
|-------|-----|
| YANK1 | 100 |
| YANK2 | 100 |
| YES   | 100 |
| ZAK   | 100 |

**Table S3.** Off-target evaluation of **8a** against JNK1 & RIOK2 by DSF and NanoBRET.

| Compound  | DSF $\Delta T_m$ [°C] |       | NanoBRET™ EC <sub>50</sub> |              |
|-----------|-----------------------|-------|----------------------------|--------------|
|           | JNK1                  | RIOK2 | JNK1                       | RIOK2        |
| <b>1</b>  | 6.70                  | 9.40  | n.d.                       | 76 nM        |
| <b>8a</b> | 1.40                  | 0.70  | > 50 $\mu$ M               | > 50 $\mu$ M |
| <b>8b</b> | n.d.                  | 3.90  | n.d.                       | n.d.         |
| <b>8c</b> | 1.95                  | 3.20  | n.d.                       | 3.7 $\mu$ M  |

## Experimental Section

**Differential Scanning Fluorimetry Assay.** Recombinant protein kinase domains with a concentration of 2  $\mu\text{M}$  were mixed with a 10  $\mu\text{M}$  compound solution in DMSO, using a final buffer consisting of 20 mM HEPES, pH 7.5, and 500 mM NaCl. SYPRO Orange (5000 $\times$ , Invitrogen) was added as a fluorescence probe (1  $\mu\text{l}$  per mL) in a final concentration of 5 $\times$ . Subsequently, temperature-dependent protein unfolding profiles were measured, using the QuantStudio™ 5 realtime PCR machine (Thermo Fisher). Excitation and emission filters were set to 465 nm and 590 nm. The temperature was raised with a step rate of 3°C per minute. Data points were analysed with the internal software (Thermal Shift Software™ Version 1.4, Thermo Fisher) using the Boltzmann equation to determine the inflection point of the transition curve. Differences in melting temperature are given as  $\Delta T_m$  values in °C. Measurements were performed in duplicates.

**Isothermal titration calorimetry (ITC):** Thermodynamic parameters of the interactions were measured by ITC for compounds **1** and **8a** with Bmpr2 (residues 189–517). Sample cell and injection syringe were equilibrated with gel filtration buffer, the compound solution (12.5  $\mu\text{M}$  of **1** and **8a**, prepared in gel filtration buffer) was added into the sample cell and the protein (71  $\mu\text{M}$  for **1** and **8a**, in gel filtration buffer) filled into an injection syringe. The experiments were performed at 20 °C for **1** and **8a** with 35 injections of 2  $\mu\text{L}$  each using a Nano ITC device (TA Instruments).

**ADP-Glo™.** The assay was performed as per the manufacturer's instructions (Promega, Catalog No VA7389) using 1 $\times$  Kinase Reaction buffer and a final concentration of 10  $\mu\text{M}$  ATP, 2  $\mu\text{g}/\mu\text{L}$  (17.4 nM) Bmpr2 (aa174-end, MW 115 kDa) and 0.1  $\mu\text{g}/\mu\text{L}$  Native Swine Myelin Basic Protein (MBP) as Substrate. For the assay, inhibitor was titrated into white 384 small volume assay plates (Greiner 784075) as an 11-point dose-response in technical duplicates in a final concentration range of 45  $\mu\text{M}$  to 830 pM using an Echo 550 acoustic dispenser (Beckman) including a no inhibitor control (DMSO only) that was used as an uninhibited control reaction. ATP was added using the Echo 550 and the reaction was started by adding 5  $\mu\text{L}$  Bmpr2 in

1x kinase buffer including a no kinase control that was used as a background control. The reaction was allowed to continue at RT for 60 min before adding 5  $\mu$ L of the stopping reagent. After an incubation of 40 min at RT, 10  $\mu$ L of the detection reagent was added and the plate incubated for 30 min at RT. Luminescence of the plate was then detected using a PHERAstar FSX Platereader (BMG Labtech) and the data normalized to background and uninhibited control and graphed using GraphPad Prism 9 using the normalized 3-parameter-fit with the following equation:  $Y=100/(1+10^{(X-\text{LogIC}_{50})})$

**NanoBRET™:** The assay was performed as described previously.<sup>1</sup> In brief: full-length kinases were obtained as plasmids cloned in frame with a N-terminal NanoLuc-fusion for GSK3A (Promega, NV3191), GSK3B (Promega, NV3201) JNK1 (Promega, NV1701) and RIOK2 (Promega, NV1961). Plasmids were transfected into HEK293T cells using FuGENE HD (Promega, E2312), and proteins were allowed to express for 20 h. Serially diluted inhibitor and NanoBRET™ Kinase Tracer K8 (Promega, N2820) at a concentration determined previously as the Tracer  $K_{D,app}$  (GSK3A 150 nM and GSK3B 200 nM) or NanoBRET™ Kinase Tracer K10 (Promega, N2840) at a concentration determined previously as the Tracer  $K_{D,app}$  (JNK1 130 nM and RIOK2 500 nM) were pipetted into white 384-well plates (Greiner 781207) using an Echo acoustic dispenser (Labcyte). The corresponding protein-transfected cells were added and reseeded at a density of  $2.5 \times 10^5$  cells/mL after trypsinization and resuspending in Opti-MEM without phenol red (Life Technologies). The system was allowed to equilibrate for 2 hours at 37 °C/5% CO<sub>2</sub> prior to BRET measurements. To measure BRET, NanoBRET™ NanoGlo Substrate + Extracellular NanoLuc Inhibitor (Promega, N2540) was added as per the manufacturer's protocol, and filtered luminescence was measured on a PHERAstar plate reader (BMG Labtech) equipped with a luminescence filter pair (450 nm BP filter (donor) and 610 nm LP filter (acceptor)). Competitive displacement data were then graphed using GraphPad Prism 9 software using a normalized 3-parameter curve fit with the following equation:  $Y=100/(1+10^{(X-\text{LogIC}_{50})})$ .

**Docking.** The protein structure Bmpr2 (PDB:6UNP) was used for docking. The protein structures and ligands were prepared according to the standard protocol of Autodock Vina.<sup>2,3</sup> Briefly, the protein structures were added hydrogen atoms by REDUCE at neutral pH and allowed the Asn, Gln and His sidechains to flip,<sup>4</sup> then the protein structures were converted to PDBQT format using the script prepare\_receptor from ADFR suite,<sup>5,6</sup> hetero-atoms including water, cofactors, ions and any other non-protein atoms contained in the protein structures were removed before docking. Ligands were converted to PDBQT format in the default setting using the script prepare\_ligand from ADFR suite,<sup>5,6</sup> with addition to add hydrogens, merge non-polar hydrogens, merge charges and remove lone pairs. PyMOL were used to view the docking results in PDBQT formats,<sup>7</sup> PLIP web-server was used to analyze the protein-ligand interactions with all parameters in default setting.<sup>8</sup>

**Kinome-Wide Selectivity Profile.** Compounds **1** and **8a** were tested at a concentration of 1  $\mu$ M against a panel of 468 kinases in the KINOMEScan assay performed by Eurofins Scientific.

**Chemistry.** The synthesis of compounds will be explained in the following and the analytical data for them can be found in the Supporting Information. All commercial chemicals were purchased from common suppliers with a purity  $\geq$  95% and were used without further purification. The solvents with an analytical grade were obtained from VWR Chemicals and Merck and all dry solvents from Acros Organics. All reactions were proceeded under an argon atmosphere. The thin layer chromatography was done with silica gel on aluminum foils (60 Å pore diameter) obtained from Macherey-Nagel and visualized with ultraviolet light ( $\lambda = 254$  and 365 nm). The purification of the compounds was done by flash chromatography. A puriFlash XS 420 device with a UV-VIS multiwave detector (200–400 nm) from Interchim was used with pre-packed normal-phase PF-SIHP silica columns with particle sizes of 15 and 30  $\mu$ m (Interchim). Preparative purification by HPLC was carried out on an Agilent 1260 Infinity II device using an Eclipse XDB-C18 (Agilent, 21.2 x 250mm, 7 $\mu$ m) reversed phase column. A suitable gradient (flow rate 21 ml/min.) was used, with 0.1% TFA in water (A) and 0.1% TFA



in acetonitrile (B), as a mobile phase. The nuclear magnetic resonance spectroscopy (NMR) was performed with DPX250, AV300, AV400 or AV500 MHz spectrometers from Bruker. Chemical shifts ( $\delta$ ) are reported in parts per million (ppm). DMSO-d<sub>6</sub>, chloroform-d and methylene chloride-d<sub>2</sub> was used as a solvent, and the spectra were calibrated to the solvent signal: 2.50 ppm (1H NMR) or 39.52 ppm (13C NMR) for DMSO-d<sub>6</sub>, 7.26 ppm (1H NMR) or 77.16 ppm (13C NMR) for chloroform-d and 5.32 ppm (1H NMR) or 54.00 ppm (13C NMR) for methylene chloride-d<sub>2</sub>. Coupling constants (J) were reported in hertz (Hz) and multiplicities were designated as followed: s (singlet), d (doublet), dd (doublet of doublet), t (triplet), dt (doublet of triplets), td (triplet of doublets), ddd (doublet of doublet of doublet), q (quartet), m (multiplet). Mass spectra were measured on a Surveyor MSQ device from ThermoFisher measuring in the positive- or negative-ion mode. Final compounds were additionally characterized by HRMS using a MALDI LTQ Orbitrap XL from ThermoScientific. The purity of the final compounds was determined by HPLC using an Agilent 1260 Infinity II device with a 1260 DAD HS detector (G7117C; 254 nm, 280 nm, 310 nm) and a LC/MSD device (G6125B, ESI pos. 100-1000). The compounds were analyzed on a Poroshell 120 EC-C18 (Agilent, 3 x 150 mm, 2.7  $\mu$ m) reversed phase column using 0.1% formic acid in water (A) and 0.1% formic acid in acetonitrile (B) as a mobile phase. The following gradient was used: 0 min 5% B - 2 min 5% B - 8 min 98% B - 10 min 98% B (flow rate of 0.5 mL/min). UV-detection was performed at 254, 280 and 310 nm and all compounds used for further biological characterizations showed a purity  $\geq$ 95%. No unexpected or unusually high safety hazards were encountered.

#### **Synthesis of methyl 5-((2-chloropyrimidin-4-yl)amino)-1H-pyrazole-3-carboxylate (4).**

3-amino-1H-pyrazole-5-carboxylate (500 mg, 3.54 mmol, 1.1 eq) and 2,4-dichloropyrimidine (480 mg, 3.22 mmol, 1.0 eq) were dissolved in 15 mL anhydrous isopropanol. TEA (978 mg, 9.66 mmol, 3.0 eq) was added and the mixture was stirred at 50 °C for 72 h. The solvent was evaporated under reduced pressure and the crude product was purified by flash chromatography using n-hexane/ ethyl acetate as an eluent to obtain the product (132 mg, 16%) as a white solid. Molecular formula: C<sub>9</sub>H<sub>8</sub>ClN<sub>5</sub>O<sub>2</sub>. <sup>1</sup>H NMR (250 MHz, DMSO-d<sub>6</sub>)  $\delta$  13.70

(s, 1H), 10.63 (s, 1H), 8.20 (d, J = 5.9 Hz, 1H), 7.19 – 6.81 (m, 2H), 3.86 (s, 3H). <sup>13</sup>C NMR (151 MHz, DMSO) δ 160.56, 159.39, 147.77, 133.08, 128.15, 127.41, 99.45, 52.04. MS-ESI m/z [M + Na]<sup>+</sup>: calcd 276.7, found 276.1.

**Synthesis of methyl 5-((2-((4-(2-((*tert*-butoxycarbonyl)amino)ethyl)phenyl)amino)-pyrimidin-4-yl)amino)-1*H*-pyrazole-3-carboxylate (5a).**

**4** (214 mg, 0.84 mmol, 1.0 eq) and *tert*-butyl 4-aminophenethylcarbamate (181 mg, 0.77 mmol, 1.0 eq) were dissolved in 13 mL anhydrous ethanol. An catalytic amount of 1 M HCl was added and the mixture was stirred under reflux for 18 h. The solvent was evaporated under reduced pressure and the crude product was purified by flash chromatography using DCM/ methanol as an eluent to obtain the product (219 mg, 63%) as a light yellow solid. Molecular formula: C<sub>22</sub>H<sub>27</sub>N<sub>7</sub>O<sub>4</sub>. <sup>1</sup>H NMR (250 MHz, DMSO-d<sub>6</sub>) δ 13.87 (s, 1H), 11.29 (s, 1H), 10.50 (s, 1H), 8.00 (d, J = 6.9 Hz, 1H), 7.47 (d, J = 8.0 Hz, 2H), 7.23 (d, J = 8.1 Hz, 2H), 7.06 (s, 1H), 6.90 (t, J = 5.3 Hz, 1H), 6.52 (s, 1H), 3.87 (s, 3H), 3.22 – 3.10 (m, 2H), 2.80 – 2.65 (m, 2H), 1.37 (s, 9H). <sup>13</sup>C NMR (126 MHz, DMSO) δ 160.11, 155.54, 146.85, 136.35, 133.35, 129.22, 122.79, 100.87, 99.04, 77.52, 52.04, 41.52, 35.06, 28.24. MS-ESI m/z [M + H]<sup>+</sup>: calcd 454.5, found 454.1. HRMS m/z [M + Na]<sup>+</sup>: calcd 476.2017, found 476.2038. HPLC: t<sub>R</sub> = 6.09, purity ≥ 95% (UV: 254/ 280 nm).

**Synthesis of methyl 5-((2-((3-(2-((*tert*-butoxycarbonyl)amino)ethyl)phenyl)amino)-pyrimidin-4-yl)amino)-1*H*-pyrazole-3-carboxylate (5b).**

The title compound was prepared according to the procedure of **5a**, using **4** (225 mg, 0.89 mmol) and *tert*-butyl 3-aminophenethylcarbamate (191 mg, 0.81 mmol). The mixture was stirred for 18 h under reflux to obtain the product (178 mg, 49%) as a light yellow solid. Molecular formula: C<sub>22</sub>H<sub>27</sub>N<sub>7</sub>O<sub>4</sub>. <sup>1</sup>H NMR (250 MHz, DMSO-d<sub>6</sub>) δ 13.85 (s, 1H), 11.33 (s, 1H), 10.54 (s, 1H), 8.01 (d, J = 6.7 Hz, 1H), 7.54 – 7.28 (m, 3H), 7.08 (d, J = 7.1 Hz, 1H), 6.98 (s, 1H), 6.85 (t, J = 5.6 Hz, 1H), 6.52 (s, 1H), 3.84 (s, 3H), 3.16 – 3.06 (m, 2H), 2.75 – 2.64 (m, 2H), 1.34 (s, 9H). <sup>13</sup>C NMR (126 MHz, DMSO) δ 160.28, 159.49, 155.52, 153.45, 147.09, 140.65, 136.85, 133.51, 129.09, 125.61, 123.38, 121.02, 100.73, 99.19, 77.53, 51.93, 41.30,

35.37, 28.22. MS-ESI  $m/z$   $[M + H]^+$ : calcd 454.5, found 454.3. HRMS  $m/z$   $[M + H]^+$ : calcd 454.2197, found 454.2182. HPLC:  $t_R$  = 6.07, purity  $\geq$  95% (UV: 254/ 280 nm).

**Synthesis of methyl 5-((2-((5-((*tert*-butoxycarbonyl)amino)pentyl)amino)pyrimidin-4-yl)amino)-1*H*-pyrazole-3-carboxylate (5c).**

**4** (180 mg, 0.71 mmol, 1.0 eq) and *tert*-butyl (5-aminopentyl)carbamate (144 mg, 0.71 mmol, 1.0 eq) were dissolved in 12 mL anhydrous ethanol. TEA (215 mg, 2.13 mmol, 3.0 eq) was added and the mixture was stirred at 120 °C for 5 h under microwave irradiation. The solvent was evaporated under reduced pressure and the crude product was purified by flash chromatography using DCM/ methanol as an eluent to obtain the product (142 mg, 45%) as a white solid. Molecular formula:  $C_{19}H_{29}N_7O_4$ .  $^1H$  NMR (400 MHz, DMSO- $d_6$ )  $\delta$  13.38 (s, 1H), 9.91 (d,  $J$  = 185.8 Hz, 1H), 7.83 (s, 1H), 7.21 (s, 1H), 6.75 (s, 2H), 6.04 (d,  $J$  = 53.4 Hz, 1H), 3.82 (s, 3H), 3.23 (q,  $J$  = 6.3 Hz, 2H), 2.91 (q,  $J$  = 6.4 Hz, 2H), 1.61 – 1.46 (m, 2H), 1.36 (s, 13H).  $^{13}C$  NMR (101 MHz, DMSO)  $\delta$  162.50, 160.04, 157.02, 156.06, 150.13, 142.02, 100.07, 96.24, 77.78, 52.27, 41.26, 40.66, 29.78, 29.39, 28.74, 24.33. MS-ESI  $m/z$   $[M + H]^+$ : calcd 420.5, found 420.9. HRMS  $m/z$   $[M + H]^+$ : calcd 420.2354, found 420.2350. HPLC:  $t_R$  = 5.57, purity  $\geq$  95% (UV: 254/ 280 nm).

**Synthesis of methyl 5-((2-((2-((2-((*tert*-butoxycarbonyl)amino)ethoxy)ethyl)amino)-pyrimidin-4-yl)amino)-1*H*-pyrazole-3-carboxylate (5d).**

The title compound was prepared according to the procedure of **5c**, using **4** (200 mg, 0.79 mmol) and *tert*-butyl (2-(2-aminoethoxy)ethyl)carbamate (161 mg, 0.79 mmol). The mixture was stirred for 5 h at 120 °C to obtain the product (10 mg, 31%) as a colorless oil. Molecular formula:  $C_{18}H_{27}N_7O_5$ .  $^1H$  NMR (500 MHz, DMSO- $d_6$ )  $\delta$  13.39 (s, 1H), 9.91 (d,  $J$  = 245.4 Hz, 1H), 7.86 (s, 1H), 7.54 – 5.86 (m, 4H), 3.82 (s, 3H), 3.60 – 3.49 (m, 2H), 3.46 – 3.38 (m, 4H), 3.09 (q,  $J$  = 5.9 Hz, 2H), 1.36 (s, 9H).  $^{13}C$  NMR (126 MHz, DMSO)  $\delta$  162.14, 159.69, 156.87, 155.63, 149.28, 141.64, 132.78, 99.45, 96.01, 92.69, 77.62, 69.08, 51.72, 40.48, 28.22. MS-

ESI m/z [M + H]<sup>+</sup>: calcd 422.5, found 422.9. HRMS m/z [M + H]<sup>+</sup>: calcd 422.2146, found 422.2135. HPLC: t<sub>R</sub> = 5.18, purity ≥ 95% (UV: 254/ 280 nm).

**Synthesis of methyl 5-((2-((6-((tert-butoxycarbonyl)amino)hexyl)amino)pyrimidin-4-yl)amino)-1H-pyrazole-3-carboxylate (5e).**

The title compound was prepared according to the procedure of **5c**, using **4** (50 mg, 0.20 mmol) and *tert*-butyl (6-aminohexyl)carbamate (43 mg, 0.20 mmol). The mixture was stirred for 5 h at 120 °C to obtain the product (36 mg, 42%) as a colorless oil. Molecular formula: C<sub>20</sub>H<sub>31</sub>N<sub>7</sub>O<sub>4</sub>. <sup>1</sup>H NMR (400 MHz, DMSO-d<sub>6</sub>) δ 13.37 (s, 1H), 9.90 (d, J = 169.7 Hz, 1H), 7.85 (s, 1H), 7.17 (s, 1H), 6.94 – 6.58 (m, 2H), 6.07 (s, 1H), 3.81 (s, 3H), 3.23 (q, J = 6.7 Hz, 2H), 2.98 – 2.83 (m, 2H), 1.57 – 1.45 (m, 2H), 1.40 – 1.23 (m, 15H). <sup>13</sup>C NMR (101 MHz, DMSO) δ 162.04, 159.47, 156.64, 155.60, 149.06, 140.95, 132.46, 99.15, 95.72, 77.29, 51.72, 40.65, 29.53, 29.24, 28.27, 26.31, 26.18. MS-ESI m/z [M + H]<sup>+</sup>: calcd 434.5, found 435.0. HRMS m/z [M + H]<sup>+</sup>: calcd 434.2510, found 434.2500. HPLC: t<sub>R</sub> = 5.86, purity ≥ 95% (UV: 254/ 280 nm).

**Synthesis of methyl 3-((2-((4-(2-aminoethyl)phenyl)amino)pyrimidin-4-yl)amino)-1H-pyrazole-5-carboxylate (6a).**

**5a** (50 mg, 0.1 mmol, 1.0 eq) was dissolved in 4 mL anhydrous DCM. TFA (503 mg, 4.4 mmol, 40.0 eq) was added at 0°C and the reaction mixture was allowed to warm up to rt overnight. The solvent was evaporated under reduced pressure. The residue was dissolved in methanol and neutralized with saturated K<sub>2</sub>CO<sub>3</sub> solution. The solvent was again evaporated under reduced pressure and the crude product was used without further purification to obtain the desired product as a white solid together with salts.

**Synthesis of methyl 5-((2-((3-(2-aminoethyl)phenyl)amino)pyrimidin-4-yl)amino)-1H-pyrazole-3-carboxylate (6b).**

The title compound was prepared according to the procedure of **6a**, using **5b** (178 mg, 0.39 mmol). The desired product was obtained as a white solid with salts.

**Synthesis of methyl 5-((2-((5-aminopentyl)amino)pyrimidin-4-yl)amino)-1H-pyrazole-3-carboxylate (6c).**

The title compound was prepared according to the procedure of **6a**, using **5c** (142 mg, 0.34 mmol). The desired product was obtained as a white solid with salts.

**Synthesis of methyl 5-((2-((2-(2-aminoethoxy)ethyl)amino)pyrimidin-4-yl)amino)-1H-pyrazole-3-carboxylate (6d).**

The title compound was prepared according to the procedure of **6a**, using **5d** (100 mg, 0.24 mmol). The desired product was obtained as a white solid with salts.

**Synthesis of methyl 5-((2-((6-aminohexyl)amino)pyrimidin-4-yl)amino)-1H-pyrazole-3-carboxylate (6e).**

The title compound was prepared according to the procedure of **6a**, using **5e** (95 mg, 0.22 mmol). The desired product was obtained as a white solid with salts.

**Synthesis of 5-((2-((4-(2-aminoethyl)phenyl)amino)pyrimidin-4-yl)amino)-1H-pyrazole-3-carboxylic acid (7a).**

**6a** (160 mg, 0.45 mmol, 1.0 eq) and lithium hydroxide monohydrate (95 mg, 2.26 mmol, 5.0 eq) were dissolved in 8.9 mL THF and 2.3 mL H<sub>2</sub>O. The resulting mixture was stirred at 50 °C for 16 h. The solvent was removed under reduced pressure, the residue was dissolved in H<sub>2</sub>O and it was neutralized with a 10% HCl. The solvent was removed under reduced pressure and the crude product was purified by flash chromatography using acetonitrile/ water as an eluent to obtain the desired product (116 mg, 75%) as a white solid. Molecular formula: C<sub>16</sub>H<sub>17</sub>N<sub>7</sub>O<sub>2</sub>. MS-ESI m/z [M + H]<sup>+</sup>: calcd 340.4, found 340.6.

**Synthesis of 5-((2-((3-(2-aminoethyl)phenyl)amino)pyrimidin-4-yl)amino)-1*H*-pyrazole-3-carboxylic acid (7b).**

The title compound was prepared according to the procedure of **7a**, using **6b** (139 mg, 0.39 mmol). The desired product was obtained as a white solid with salts. Molecular formula: C<sub>16</sub>H<sub>17</sub>N<sub>7</sub>O<sub>2</sub>. MS-ESI m/z [M + H]<sup>+</sup>: calcd 340.4, found 340.2.

**Synthesis of 5-((2-((5-aminopentyl)amino)pyrimidin-4-yl)amino)-1*H*-pyrazole-3-carboxylic acid (7c).**

The title compound was prepared according to the procedure of **7a**, using **6c** (108 mg, 0.34 mmol). The desired product was obtained as a white solid with salts. Molecular formula: C<sub>13</sub>H<sub>19</sub>N<sub>7</sub>O<sub>2</sub>. MS-ESI m/z [M + H]<sup>+</sup>: calcd 306.3, found 306.2.

**Synthesis of 5-((2-((2-(2-aminoethoxy)ethyl)amino)pyrimidin-4-yl)amino)-1*H*-pyrazole-3-carboxylic acid (7d).**

The title compound was prepared according to the procedure of **7a**, using **6d** (84 mg, 0.24 mmol). The desired product was obtained as a white solid with salts. Molecular formula: C<sub>12</sub>H<sub>17</sub>N<sub>7</sub>O<sub>3</sub>. MS-ESI m/z [M + H]<sup>+</sup>: calcd 308.3, found 308.2.

**Synthesis of 5-((2-((6-aminohexyl)amino)pyrimidin-4-yl)amino)-1*H*-pyrazole-3-carboxylic acid (7e).**

The title compound was prepared according to the procedure of **7a**, using **6e** (73 mg, 0.22 mmol). The desired product (41 mg, 59%) was obtained as a white solid with salts. Molecular formula: C<sub>14</sub>H<sub>21</sub>N<sub>7</sub>O<sub>2</sub>. MS-ESI m/z [M + H]<sup>+</sup>: calcd 320.4, found 320.6.

**Synthesis of (Z)-1<sup>1</sup>H-2,4,8-triaza-3(4,2)-pyrimidina-1(3,5)-pyrazola-5(1,4)-benzena-cyclonaphan-9-one (8a).**

**7a** (100 mg, 0.29 mmol, 1.0 eq) and HATU (134 mg, 0.35 mmol, 1.2 eq) were dissolved in 100 mL anhydrous DMF. DIPEA (99 mg, 0.77 mmol, 2.6 eq) was added to the resulting mixture

and it was stirred at 70 °C for 16 h. The solvent was removed under reduced pressure and the crude product was purified by flash chromatography using acetonitrile/ water as an eluent and by preparative HPLC to obtain the product (2 mg, 2%) as a white solid. Molecular formula: C<sub>16</sub>H<sub>15</sub>N<sub>7</sub>O<sub>1</sub>. <sup>1</sup>H NMR (250 MHz, DMSO-d<sub>6</sub>) δ 13.12 (s, 1H), 11.06 (s, 1H), 9.99 (s, 1H), 7.92 (d, J = 7.1 Hz, 1H), 7.25 (d, J = 8.3 Hz, 2H), 7.18 (d, J = 8.4 Hz, 2H), 6.97 (t, J = 6.0 Hz, 1H), 6.30 (d, J = 7.0 Hz, 1H), 5.74 (s, 1H), 3.54 (dd, J = 13.0, 6.7 Hz, 2H), 2.98 (t, J = 6.9 Hz, 2H). <sup>13</sup>C NMR (126 MHz, DMSO) δ 159.55, 159.46, 157.93, 157.68, 145.58, 137.73, 137.58, 135.42, 130.67, 128.68, 102.65, 98.42, 37.78, 32.52. MS-ESI m/z [M + H]<sup>+</sup>: calcd 322.3, found 322.6. HRMS m/z [M + H]<sup>+</sup>: calcd 322.1411, found 322.1403. HPLC: t<sub>R</sub> = 10.36, purity ≥ 95% (UV: 254/ 280 nm).

**Synthesis of (Z)-1<sup>1</sup>H-2,4,8-triaza-3(4,2)-pyrimidina-1(3,5)-pyrazola-5(1,3)-benzena-cyclonaphan-9-one (8b).**

The title compound was prepared according to the procedure **8a**, using **7b** (20 mg, 0.06 mmol). The mixture was stirred for 16 h at 70 °C to obtain the product (8 mg, 42%) as a white solid. Molecular formula: C<sub>16</sub>H<sub>15</sub>N<sub>7</sub>O<sub>1</sub>. <sup>1</sup>H NMR (250 MHz, DMSO-d<sub>6</sub>) δ 13.01 (s, 1H), 9.88 (s, 1H), 9.25 (s, 1H), 8.46 (s, 1H), 8.16 (s, 1H), 7.98 (d, J = 5.7 Hz, 1H), 7.32 (s, 1H), 7.15 (t, J = 7.7 Hz, 1H), 6.97 (d, J = 7.7 Hz, 1H), 6.76 (d, J = 7.3 Hz, 1H), 6.24 (d, J = 5.7 Hz, 1H), 3.53 – 3.42 (m, 4H), 2.86 – 2.70 (m, 4H). <sup>13</sup>C NMR (126 MHz, DMSO) δ 161.19, 160.84, 160.18, 159.76, 156.30, 148.09, 140.92, 138.67, 134.70, 128.48, 121.12, 117.42, 98.58, 97.99, 45.20, 44.58. MS-ESI m/z [M + H]<sup>+</sup>: calcd 322.3, found 322.2. HRMS m/z [M + H]<sup>+</sup>: calcd 322.1411, found 322.1409. HPLC: t<sub>R</sub> = 10.57, purity ≥ 95% (UV: 254/ 280 nm).

**Synthesis of (Z)-3<sup>1</sup>H-2,5,11-triaza-1(4,2)-pyrimidina-3(3,5)-pyrazolacycloundecaphan-4-one (8c).**

The title compound was prepared according to the procedure **8a**, using **7c** (100 mg, 0.33 mmol). The mixture was stirred for 16 h at rt to obtain the product (10 mg, 10%) as a white solid. Molecular formula: C<sub>13</sub>H<sub>17</sub>N<sub>7</sub>O<sub>1</sub>. <sup>1</sup>H NMR (500 MHz, DMSO-d<sub>6</sub>) δ 13.40 (s, 1H), 11.44 (s, 1H), 8.56 (t, J = 6.0 Hz, 1H), 8.10 (t, J = 7.3 Hz, 1H), 7.86 (d, J = 7.1 Hz, 1H), 7.35 (s, 1H),

6.32 (d,  $J = 7.1$  Hz, 1H), 3.57 – 3.34 (m, 2H), 3.34 – 3.18 (m, 2H), 1.74 – 1.61 (m, 4H), 1.55 – 1.39 (m, 2H).  $^{13}\text{C}$  NMR (126 MHz, DMSO)  $\delta$  160.34, 159.81, 153.79, 146.73, 143.04, 134.63, 98.11, 97.62, 42.12, 41.20, 27.92, 25.17, 22.35. MS-ESI  $m/z$   $[\text{M} + \text{H}]^+$ : calcd 288.2, found 288.2. HRMS  $m/z$   $[\text{M} + \text{H}]^+$ : calcd 288.1567, found 288.1569. HPLC:  $t_{\text{R}} = 9.81$ , purity  $\geq 95\%$  (UV: 254/ 280 nm).

**Synthesis of (Z)-3<sup>1</sup>H-8-oxa-2,5,11-triaza-1(4,2)-pyrimidina-3(5,3)-pyrazolacyclo-undecaphan-4-one (8d).**

The title compound was prepared according to the procedure **8a**, using **7d** (73 mg, 0.24 mmol). The mixture was stirred for 16 h at 70 °C to obtain the product (2 mg, 3%) as a light yellow solid. Molecular formula:  $\text{C}_{12}\text{H}_{15}\text{N}_7\text{O}_2$ .  $^1\text{H}$  NMR (250 MHz, DMSO- $d_6$ )  $\delta$  13.13 (s, 1H), 10.75 (s, 1H), 7.85 (s, 2H), 7.67 (s, 1H), 7.55 (s, 1H), 6.21 (s, 1H), 3.73 – 3.58 (m, 4H), 3.53 – 3.42 (m, 4H). MS-ESI  $m/z$   $[\text{M} + \text{H}]^+$ : calcd 290.3, found 290.2. HRMS  $m/z$   $[\text{M} + \text{Na}]^+$ : calcd 312.1179, found 312.1177. HPLC:  $t_{\text{R}} = 9.86$ , purity  $\geq 95\%$  (UV: 254/ 280 nm).

**Synthesis of (Z)-3<sup>1</sup>H-2,5,12-triaza-1(4,2)-pyrimidina-3(3,5)-pyrazolacyclododecaphan-4-one (8e).**

The title compound was prepared according to the procedure **8a**, using **7e** (31 mg, 0.10 mmol). The mixture was stirred for 16 h at 35 °C to obtain the product (5 mg, 17%) as a white solid. Molecular formula:  $\text{C}_{14}\text{H}_{19}\text{N}_7\text{O}_1$ .  $^1\text{H}$  NMR (500 MHz, DMSO- $d_6$ )  $\delta$  13.35 (s, 1H), 11.01 (s, 1H), 8.25 (s, 1H), 8.00 (s, 1H), 7.83 (d,  $J = 6.9$  Hz, 1H), 7.23 (s, 1H), 6.24 (d,  $J = 6.8$  Hz, 1H), 3.28 – 3.25 (m, 4H), 1.60 – 1.53 (m, 2H), 1.52 – 1.46 (m, 2H), 1.42 – 1.34 (m, 3H), 1.31 – 1.21 (m, 2H).  $^{13}\text{C}$  NMR (126 MHz, DMSO)  $\delta$  161.33, 159.65, 154.90, 146.16, 145.27, 138.29, 102.55, 97.76, 42.01, 38.76, 29.61, 27.88, 27.64, 24.81. MS-ESI  $m/z$   $[\text{M} + \text{H}]^+$ : calcd 302.4, found 302.5. HRMS  $m/z$   $[\text{M} + \text{H}]^+$ : calcd 302.1724, found 302.1730. HPLC:  $t_{\text{R}} = 10.46$ , purity  $\geq 95\%$  (UV: 254/ 280 nm).



# Analytical data of compounds 4 – 8e.

## ESI, <sup>1</sup>H and <sup>13</sup>C NMR data of compound 4.

JA08-1 #32-44 RT: 0.54-0.74 AV: 13 SB: 24 0.00-0.40 NL: 1.21E5  
 T: {0,0} + c ESI Icorona sid=75.00 det=1306.00 Full ms [100.00-500.00]

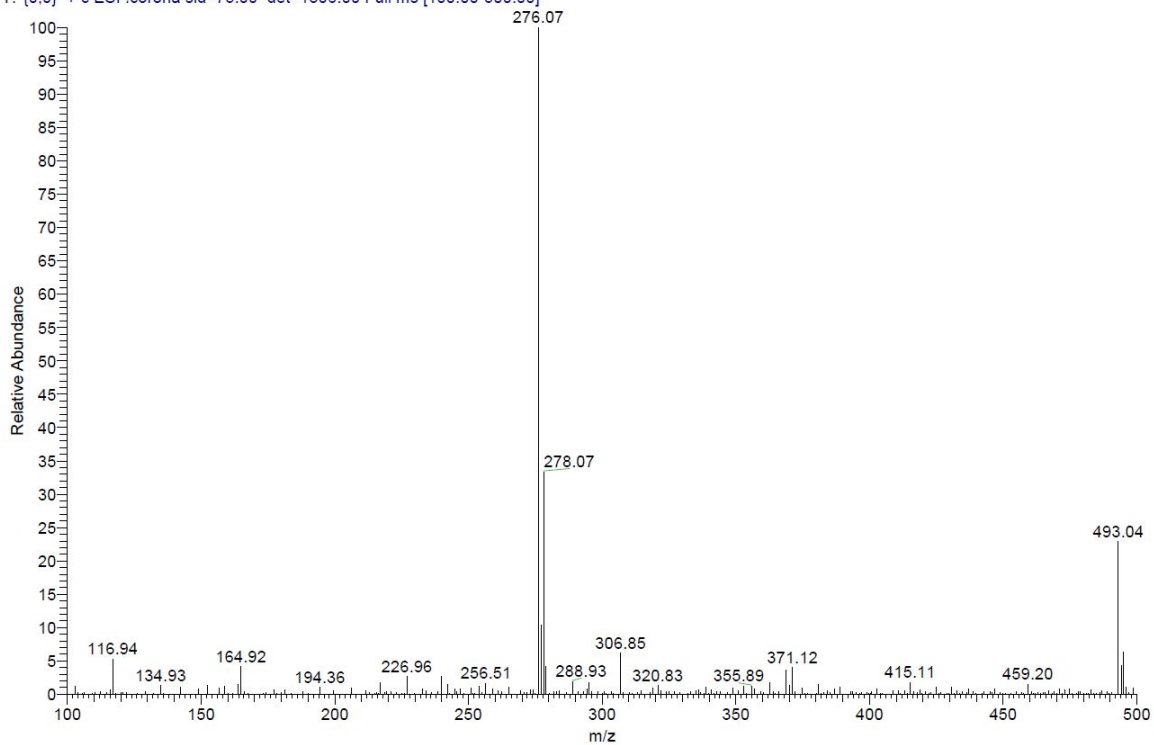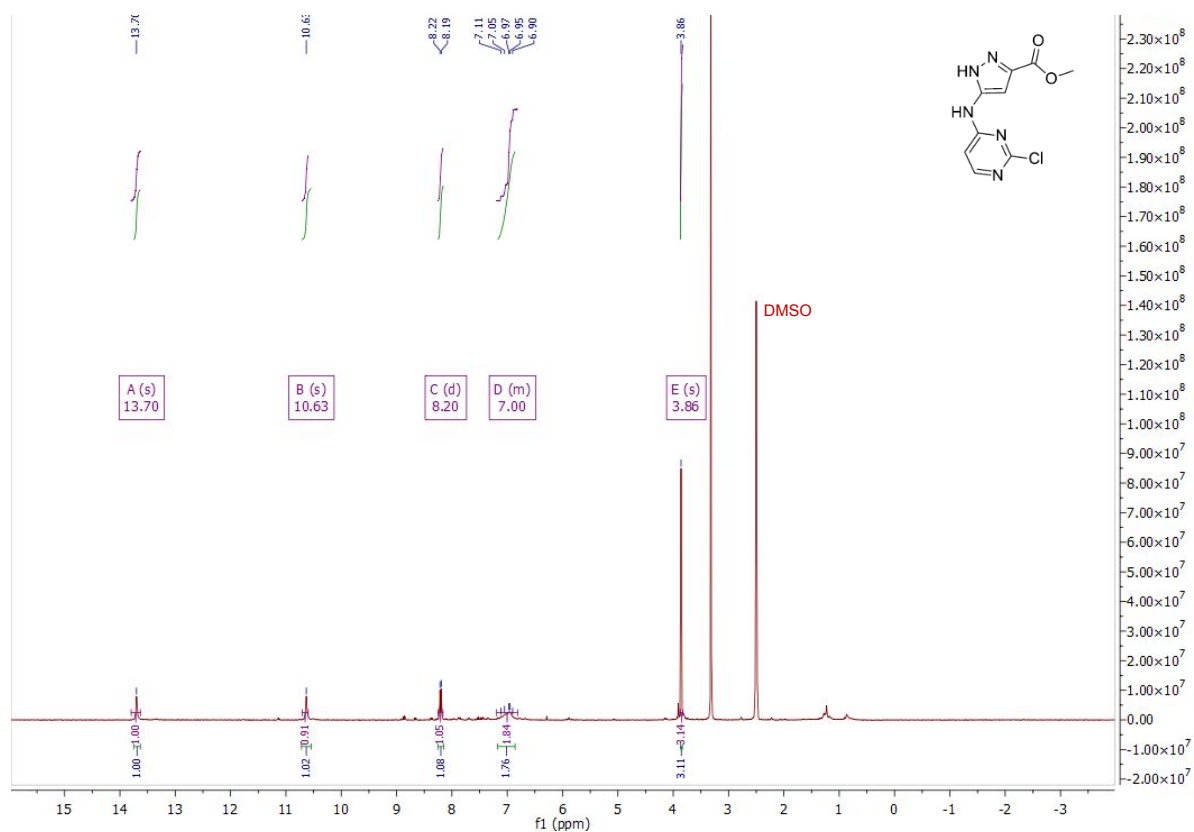

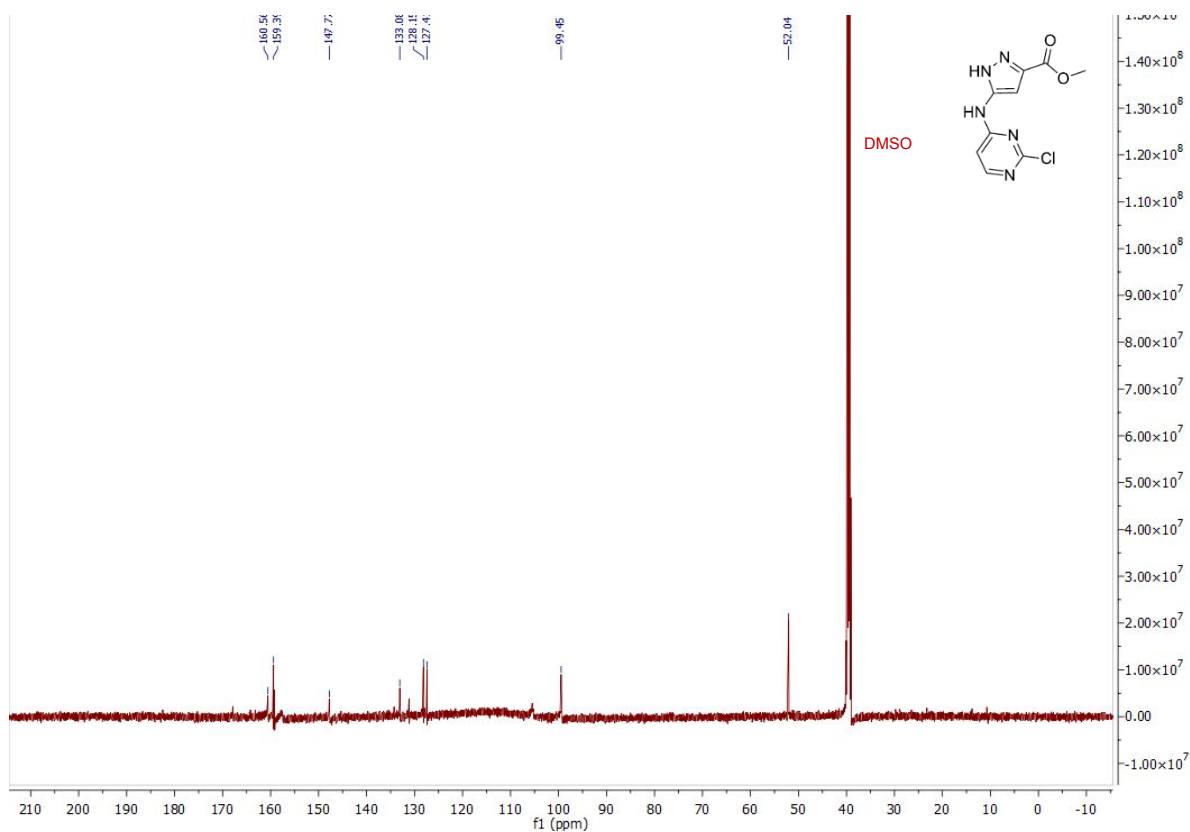

ESI, <sup>1</sup>H, <sup>13</sup>C NMR and HPLC data of compound 5a.

JA75 #37-43 RT: 0.63-0.74 AV: 7 NL: 3.06E7  
 T: {0,0} + c ESI Icorona sid=75.00 det=1506.00 Full ms [105.00-900.00]

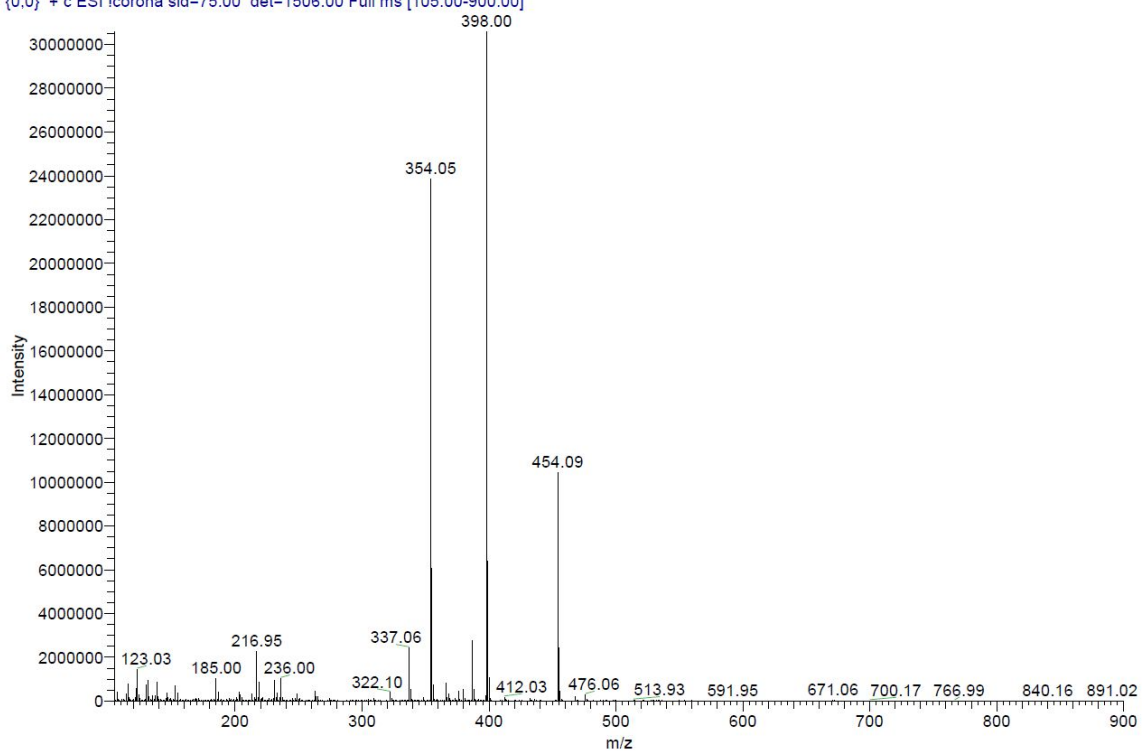

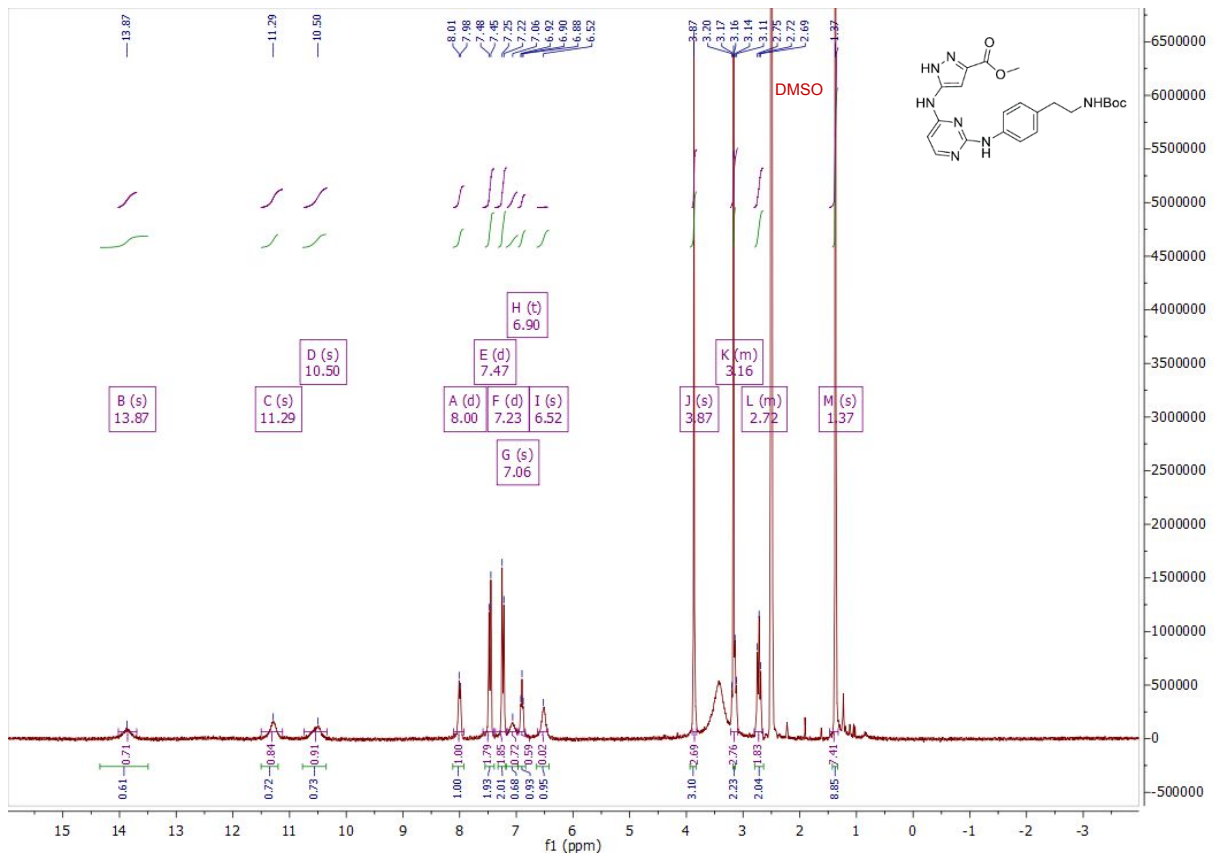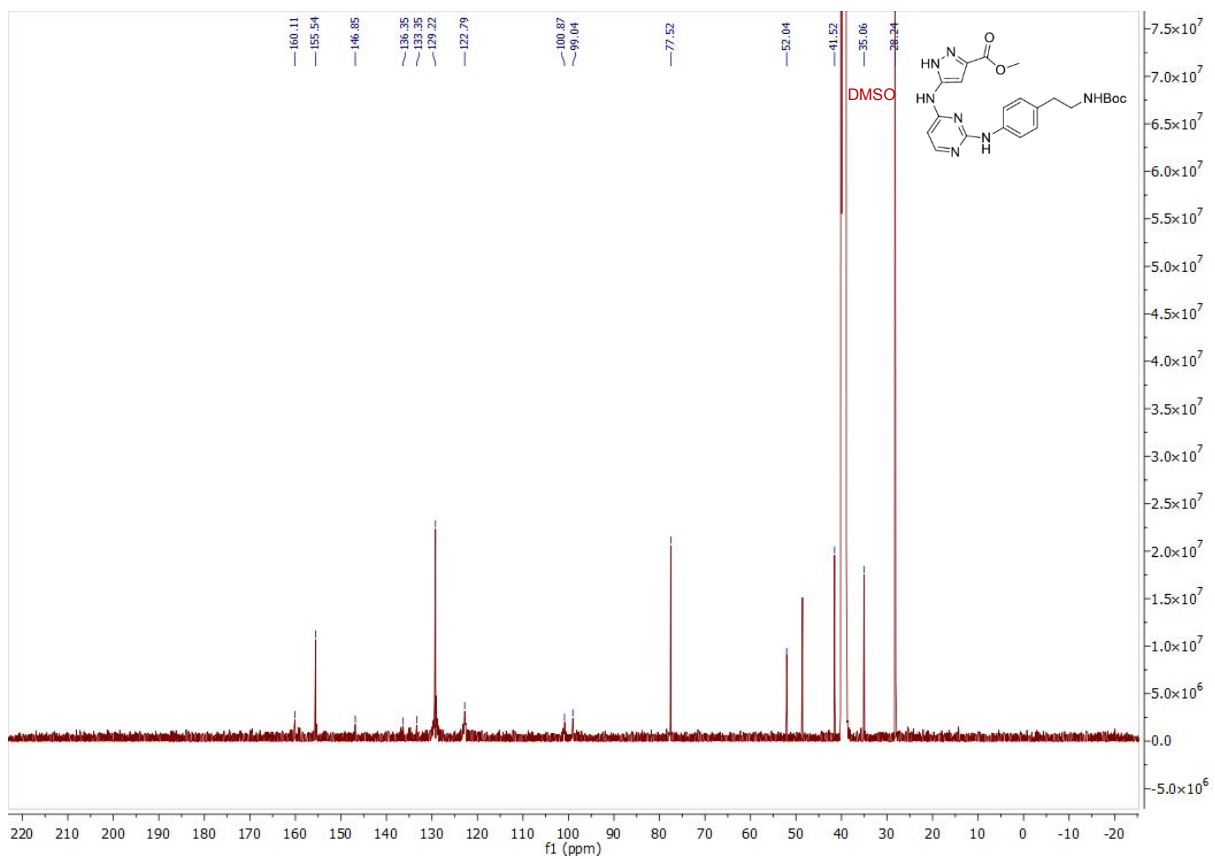

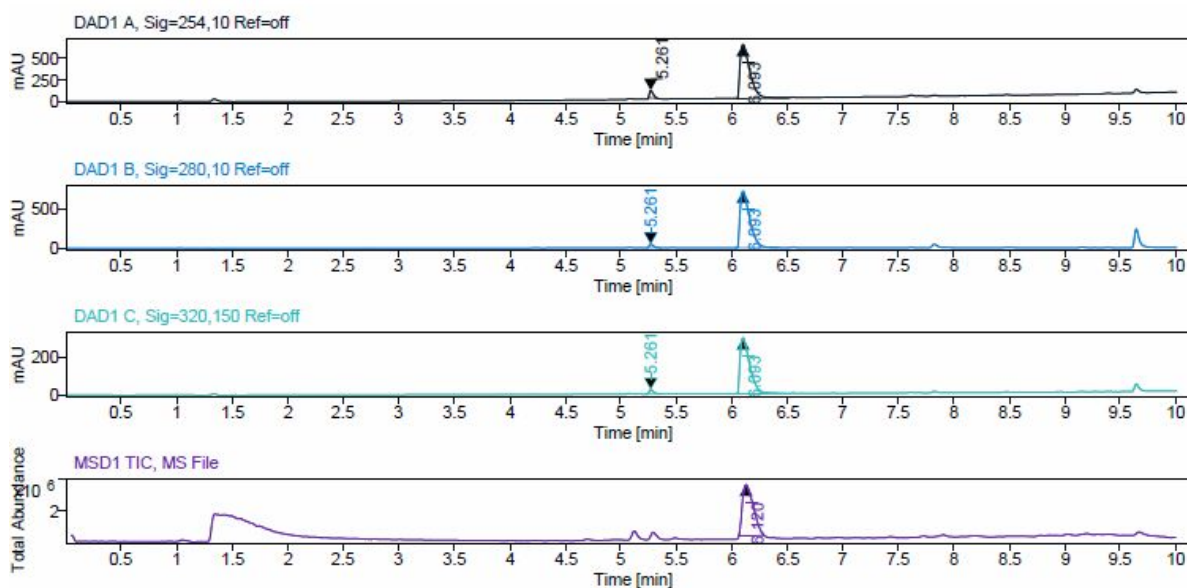

### Sample Purity

Signal Description DAD1 A, Sig=254,10 Ref=off

| Sample Name | Name | RT    | Width | Area      | Area% | Height   |
|-------------|------|-------|-------|-----------|-------|----------|
| JA86        |      | 5.261 | 0.037 | 203.0431  | 4.92  | 89.4782  |
| JA86        |      | 6.093 | 0.093 | 3921.0303 | 95.08 | 629.5381 |

Max Area% 95.077

UV Signal Purity>95% **Pass**

Signal Description DAD1 B, Sig=280,10 Ref=off

| Sample Name | Name | RT    | Width | Area      | Area% | Height   |
|-------------|------|-------|-------|-----------|-------|----------|
| JA86        |      | 5.261 | 0.040 | 122.6163  | 2.71  | 46.4638  |
| JA86        |      | 6.093 | 0.093 | 4409.0713 | 97.29 | 732.4024 |

Max Area% 97.294

UV Signal Purity>95% **Pass**

Signal Description DAD1 C, Sig=320,150 Ref=off

| Sample Name | Name | RT    | Width | Area      | Area% | Height   |
|-------------|------|-------|-------|-----------|-------|----------|
| JA86        |      | 5.261 | 0.041 | 68.8697   | 3.56  | 24.5446  |
| JA86        |      | 6.093 | 0.093 | 1865.4775 | 96.44 | 307.2874 |

Max Area% 96.440

UV Signal Purity>95% **Pass**

# ESI, <sup>1</sup>H, <sup>13</sup>C NMR and HPLC data of compound **5b**.

JA119 #36-42 RT: 0.62-0.72 AV: 7 SB: 9 0.07-0.21 NL: 3.32E6  
 T: {0,0} + c ESI Icorona sid=75.00 det=1306.00 Full ms [105.00-900.00]

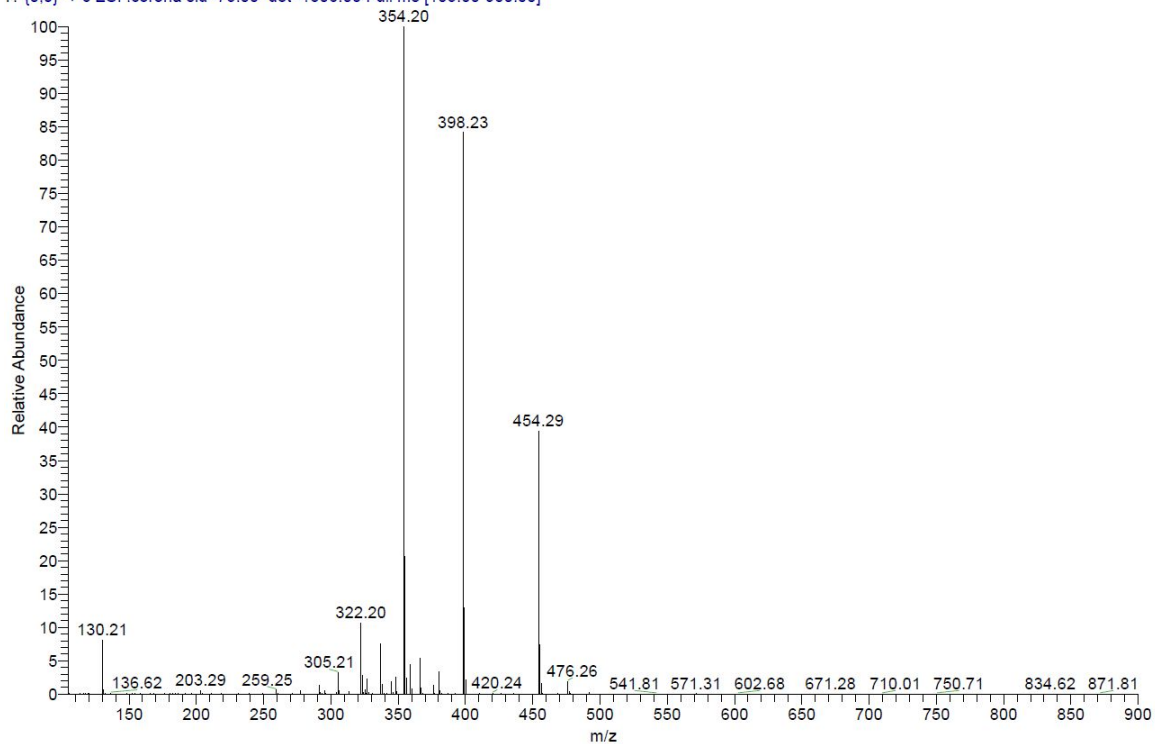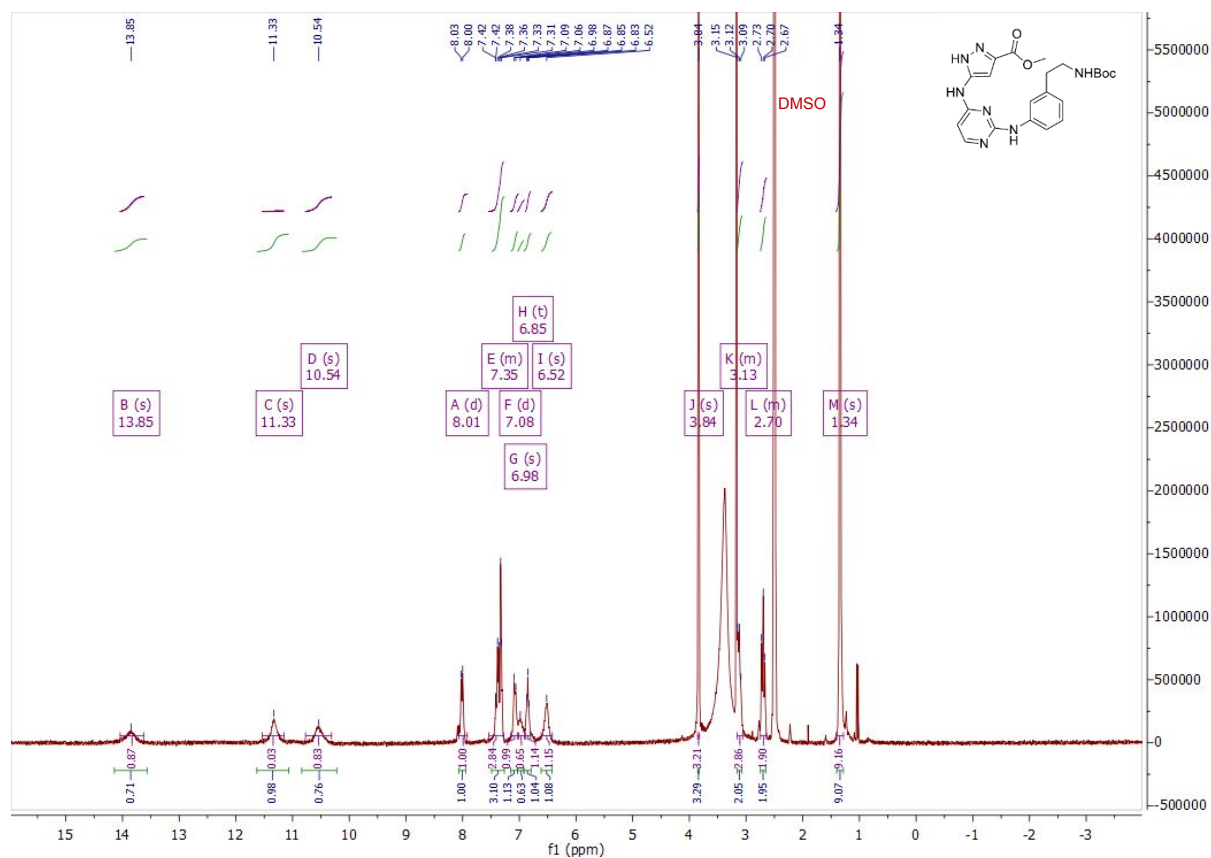

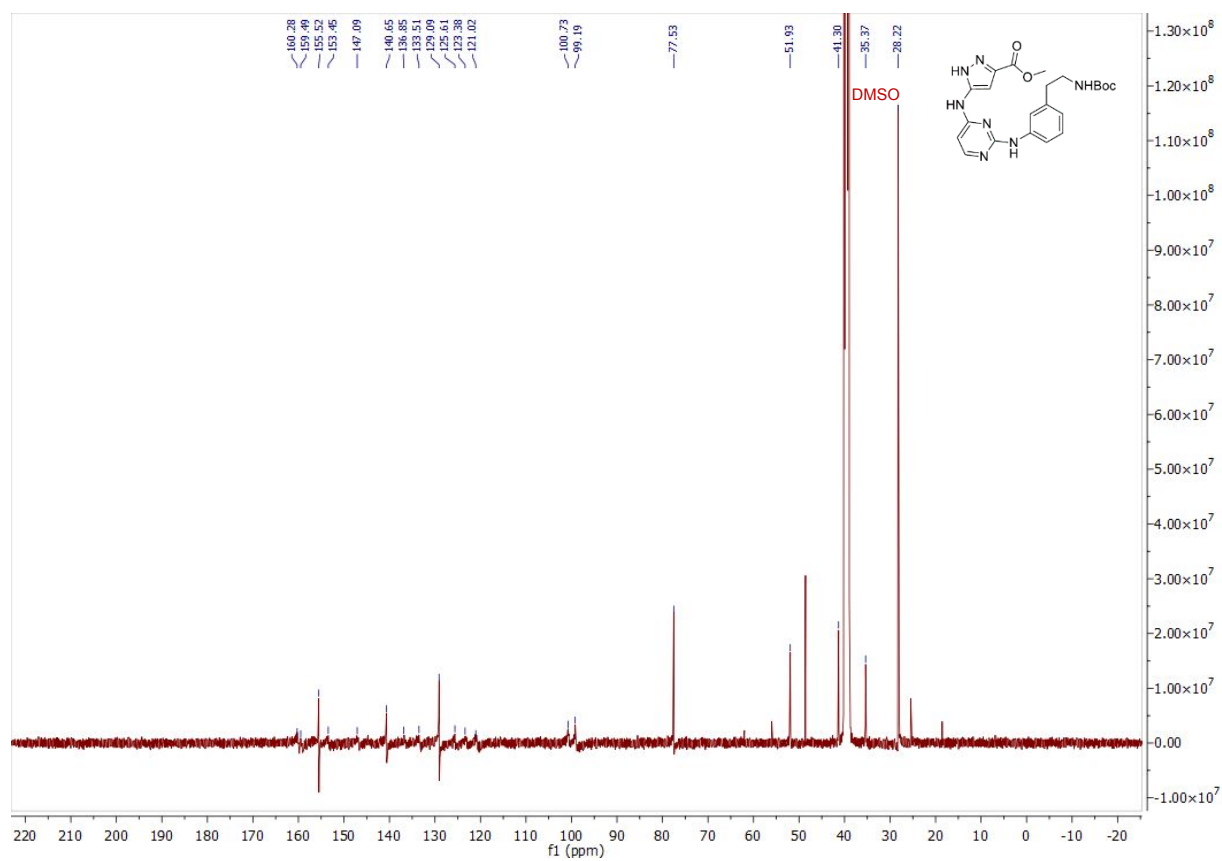

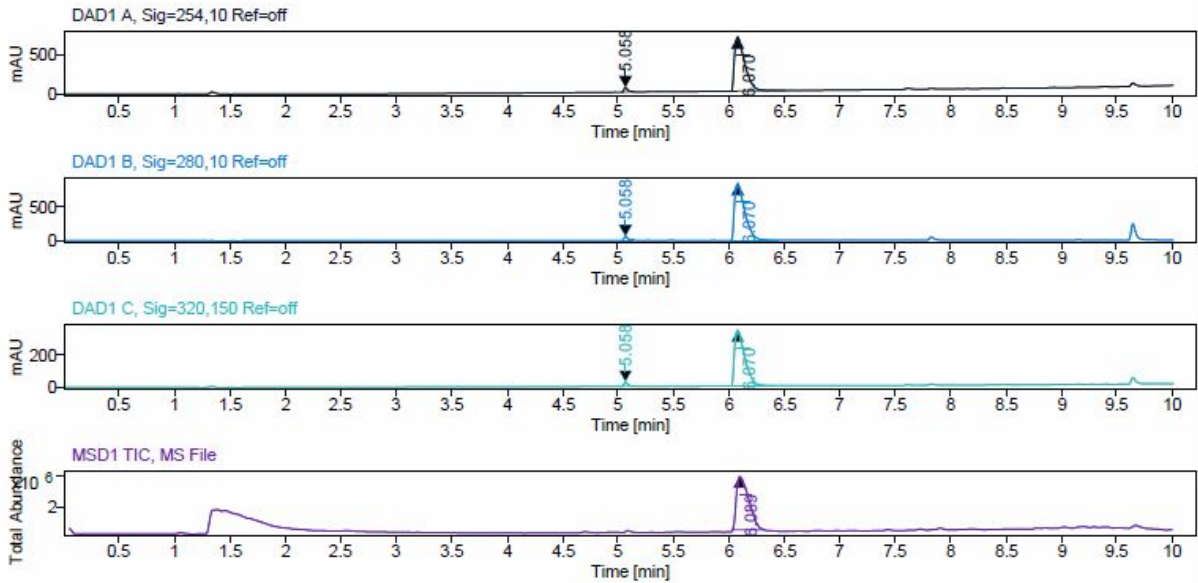

### Sample Purity

Signal Description DAD1 A, Sig=254,10 Ref=off

| Sample Name | Name | RT    | Width | Area      | Area% | Height   |
|-------------|------|-------|-------|-----------|-------|----------|
| JA119       |      | 5.058 | 0.034 | 126.3551  | 2.73  | 58.4173  |
| JA119       |      | 6.070 | 0.100 | 4507.8599 | 97.27 | 702.8458 |

Max Area% 97.273

UV Signal Purity>95% Pass

Signal Description DAD1 B, Sig=280,10 Ref=off

| Sample Name | Name | RT    | Width | Area      | Area% | Height   |
|-------------|------|-------|-------|-----------|-------|----------|
| JA119       |      | 5.058 | 0.033 | 119.3543  | 2.15  | 54.4841  |
| JA119       |      | 6.070 | 0.099 | 5443.5239 | 97.85 | 838.2568 |

Max Area% 97.854

UV Signal Purity>95% Pass

Signal Description DAD1 C, Sig=320,150 Ref=off

| Sample Name | Name | RT    | Width | Area      | Area% | Height   |
|-------------|------|-------|-------|-----------|-------|----------|
| JA119       |      | 5.058 | 0.035 | 63.1891   | 2.70  | 27.0492  |
| JA119       |      | 6.070 | 0.100 | 2277.7769 | 97.30 | 352.8789 |

Max Area% 97.301

UV Signal Purity>95% Pass

# ESI, <sup>1</sup>H, <sup>13</sup>C NMR and HPLC data of compound 5c.

JA63 #41-44 RT: 0.70-0.75 AV: 4 SB: 9 0.05-0.19 NL: 9.69E6  
 T: {0,0} + c ESI Icorona sid=75.00 det=i506.00 Full ms [105.00-700.00]

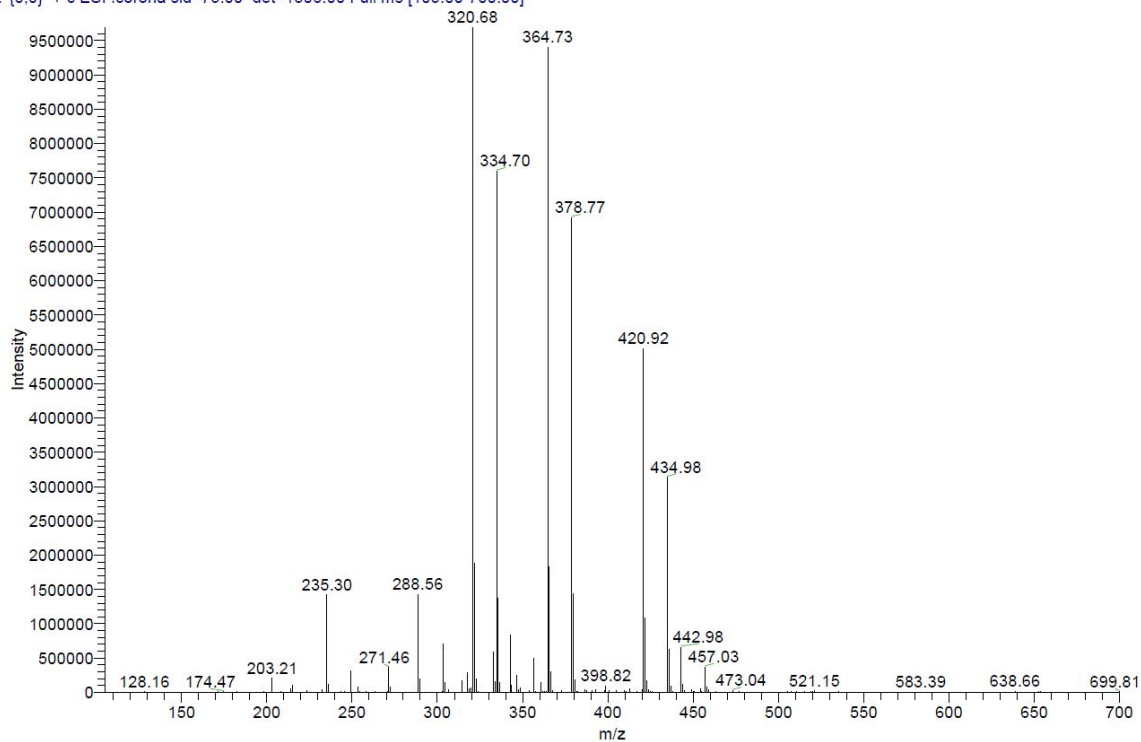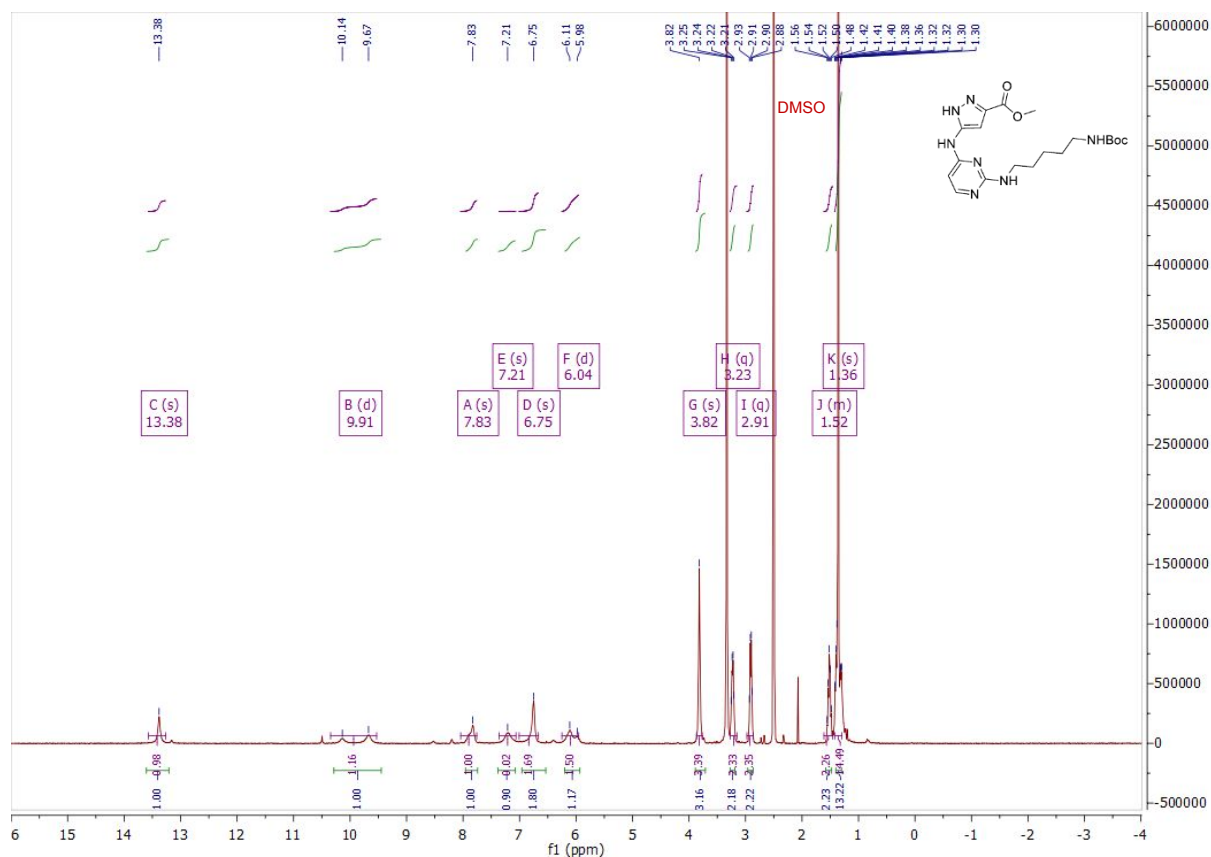



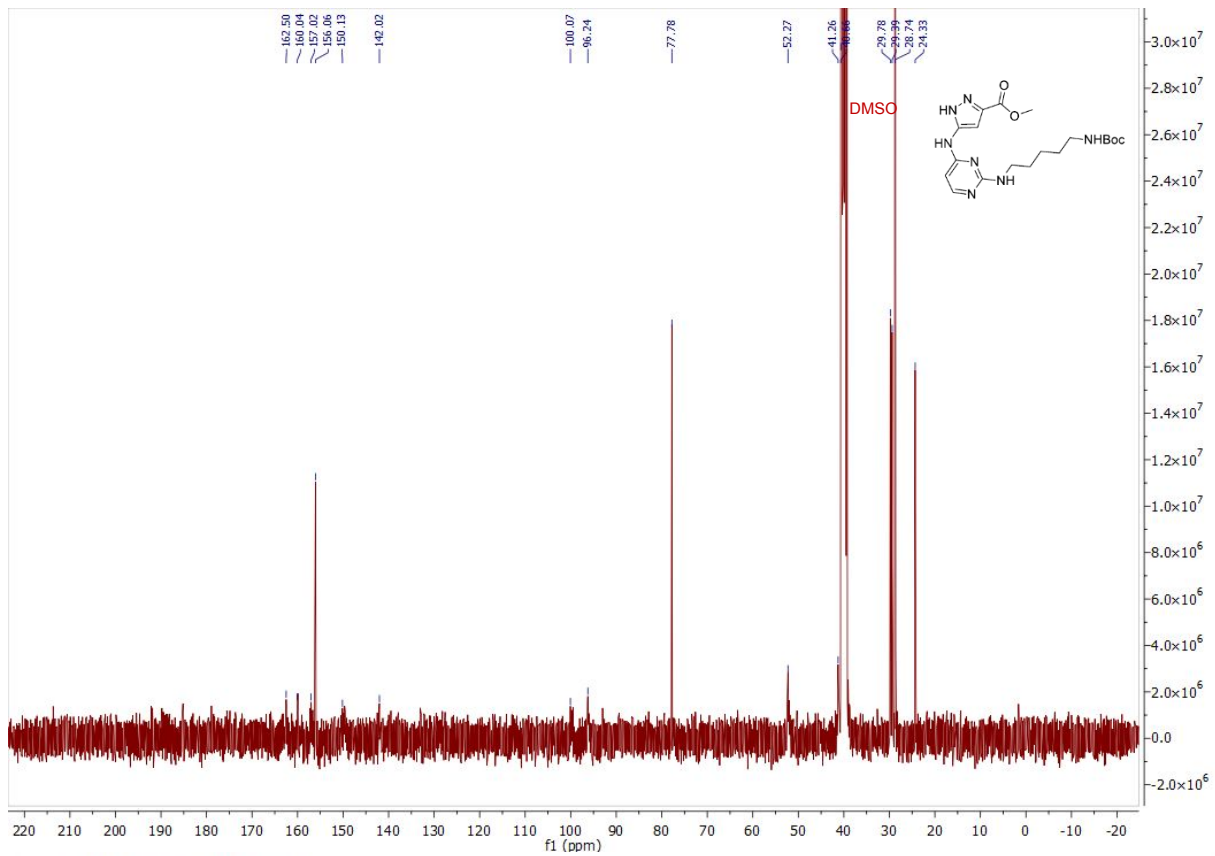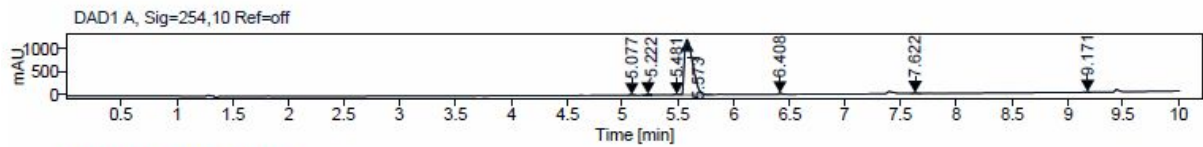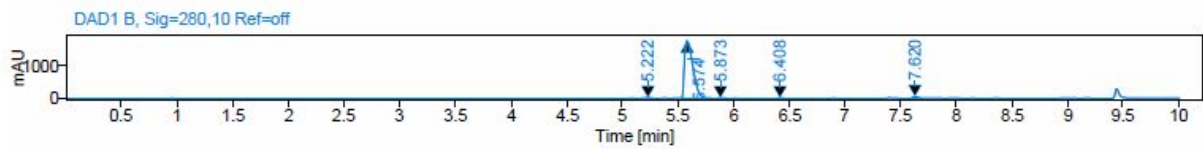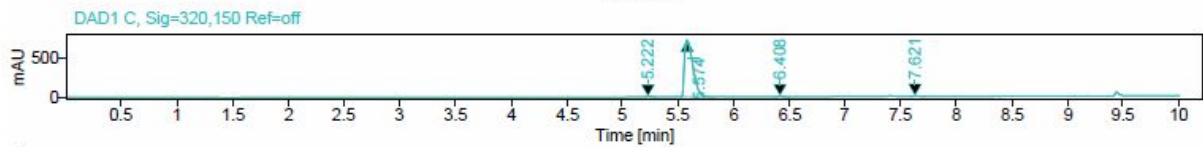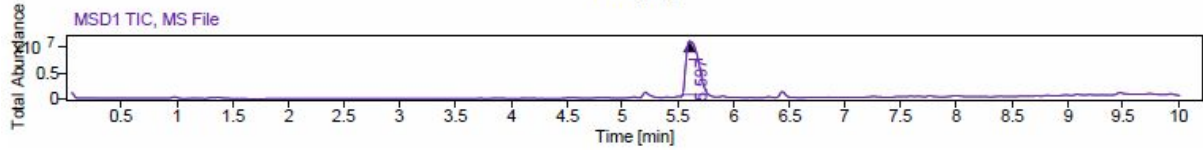

### Sample Purity

Signal Description DAD1 A, Sig=254,10 Ref=off

| Sample Name    | Name | RT    | Width | Area      | Area% | Height    |
|----------------|------|-------|-------|-----------|-------|-----------|
| JA103_prep_f14 |      | 5.077 | 0.045 | 38.5699   | 0.59  | 15.0074   |
| JA103_prep_f14 |      | 5.222 | 0.037 | 45.0486   | 0.69  | 20.1107   |
| JA103_prep_f14 |      | 5.481 | 0.051 | 35.7459   | 0.54  | 12.2971   |
| JA103_prep_f14 |      | 5.573 | 0.085 | 6298.5713 | 95.97 | 1187.9170 |
| JA103_prep_f14 |      | 6.408 | 0.032 | 66.7007   | 1.02  | 31.0731   |
| JA103_prep_f14 |      | 7.622 | 0.051 | 45.3789   | 0.69  | 13.4217   |
| JA103_prep_f14 |      | 9.171 | 0.045 | 33.1855   | 0.51  | 13.6909   |

Max Area% 95.968

UV Signal Purity>95% Pass

Signal Description DAD1 B, Sig=280,10 Ref=off

| Sample Name    | Name | RT    | Width | Area      | Area% | Height    |
|----------------|------|-------|-------|-----------|-------|-----------|
| JA103_prep_f14 |      | 5.222 | 0.033 | 34.3728   | 0.35  | 16.0165   |
| JA103_prep_f14 |      | 5.574 | 0.085 | 9455.1982 | 97.52 | 1790.9185 |
| JA103_prep_f14 |      | 5.873 | 0.031 | 23.3287   | 0.24  | 10.3943   |
| JA103_prep_f14 |      | 6.408 | 0.032 | 34.2773   | 0.35  | 14.8231   |
| Sample Name    | Name | RT    | Width | Area      | Area% | Height    |
| JA103_prep_f14 |      | 7.620 | 0.042 | 148.5687  | 1.53  | 53.3182   |

Max Area% 97.519

UV Signal Purity>95% Pass

Signal Description DAD1 C, Sig=320,150 Ref=off

| Sample Name    | Name | RT    | Width | Area      | Area% | Height   |
|----------------|------|-------|-------|-----------|-------|----------|
| JA103_prep_f14 |      | 5.222 | 0.033 | 16.8287   | 0.44  | 7.7458   |
| JA103_prep_f14 |      | 5.574 | 0.086 | 3789.2156 | 98.13 | 718.6230 |
| JA103_prep_f14 |      | 6.408 | 0.033 | 28.5044   | 0.74  | 12.9056  |
| JA103_prep_f14 |      | 7.621 | 0.042 | 26.7143   | 0.69  | 9.4558   |

Max Area% 98.134

UV Signal Purity>95% Pass

# ESI, <sup>1</sup>H, <sup>13</sup>C NMR and HPLC data of compound 5d.

JA107 #38-42 RT: 0.65-0.72 AV: 5 SB: 8 0.04-0.16 NL: 2.98E7  
 T: {0,0} + c ESI Icorona sid=75.00 det=1506.00 Full ms [105.00-800.00]

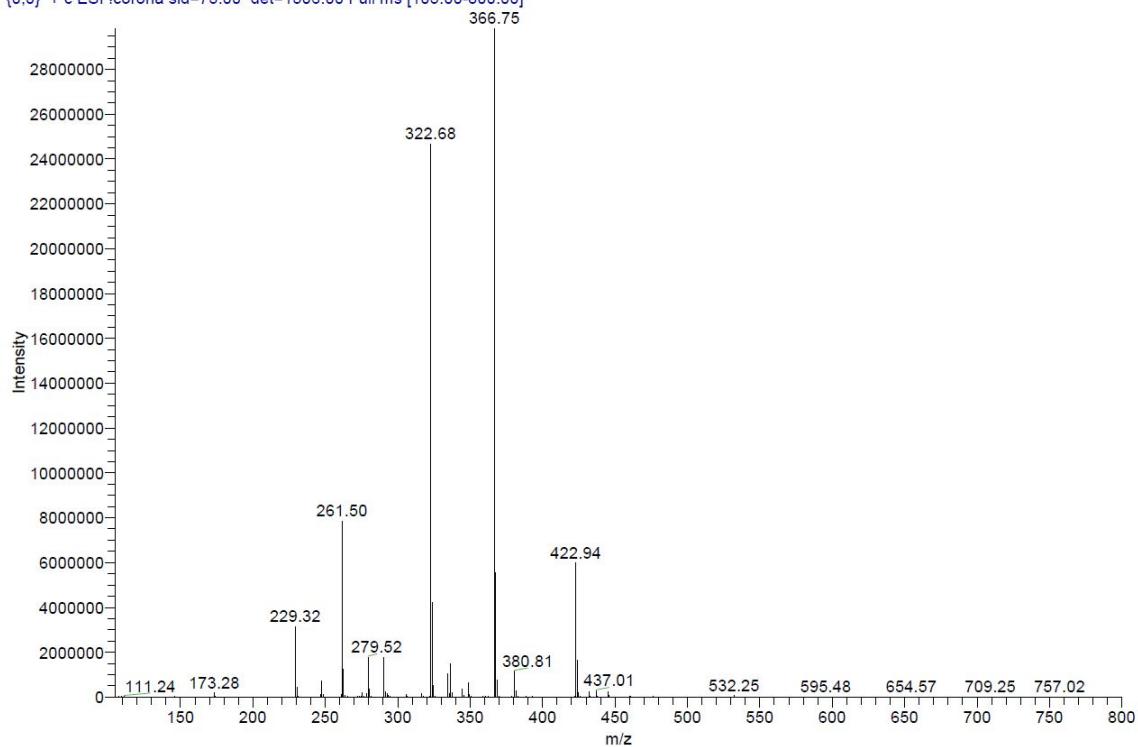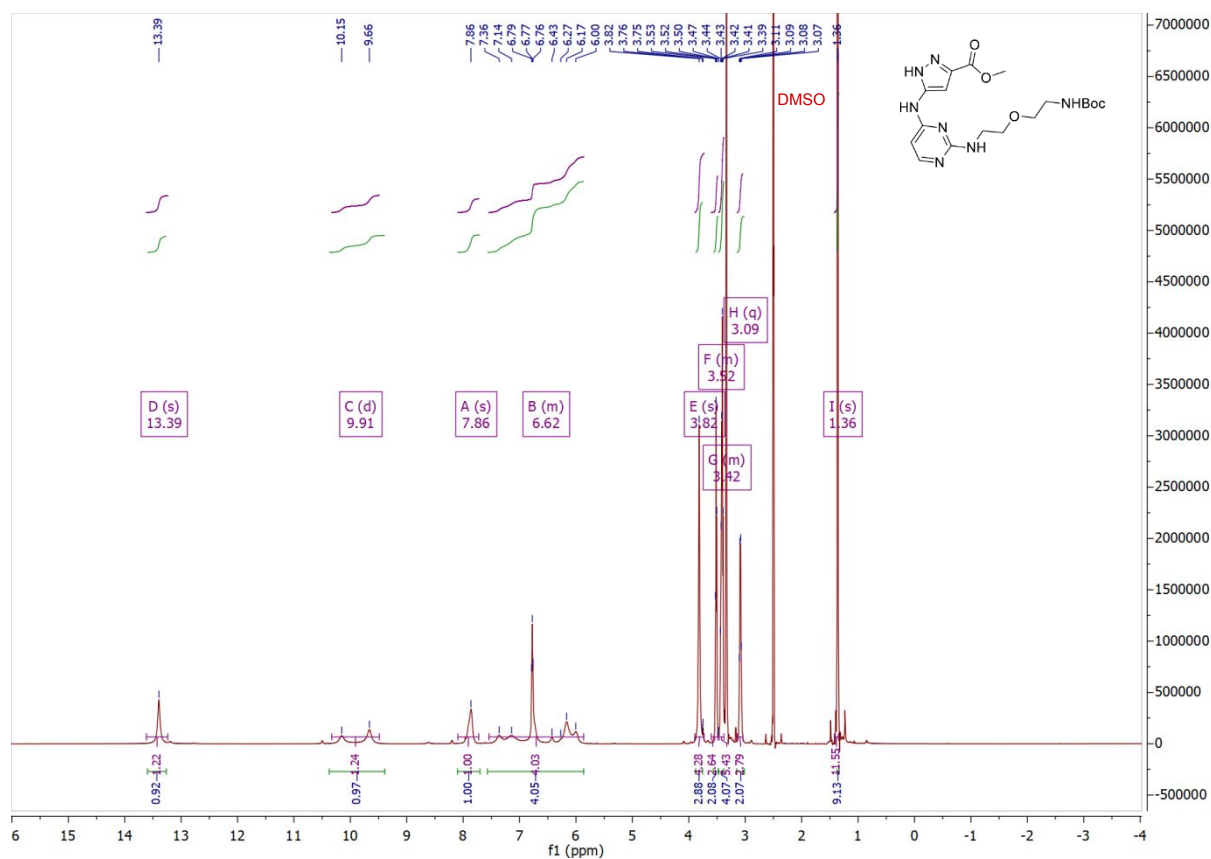

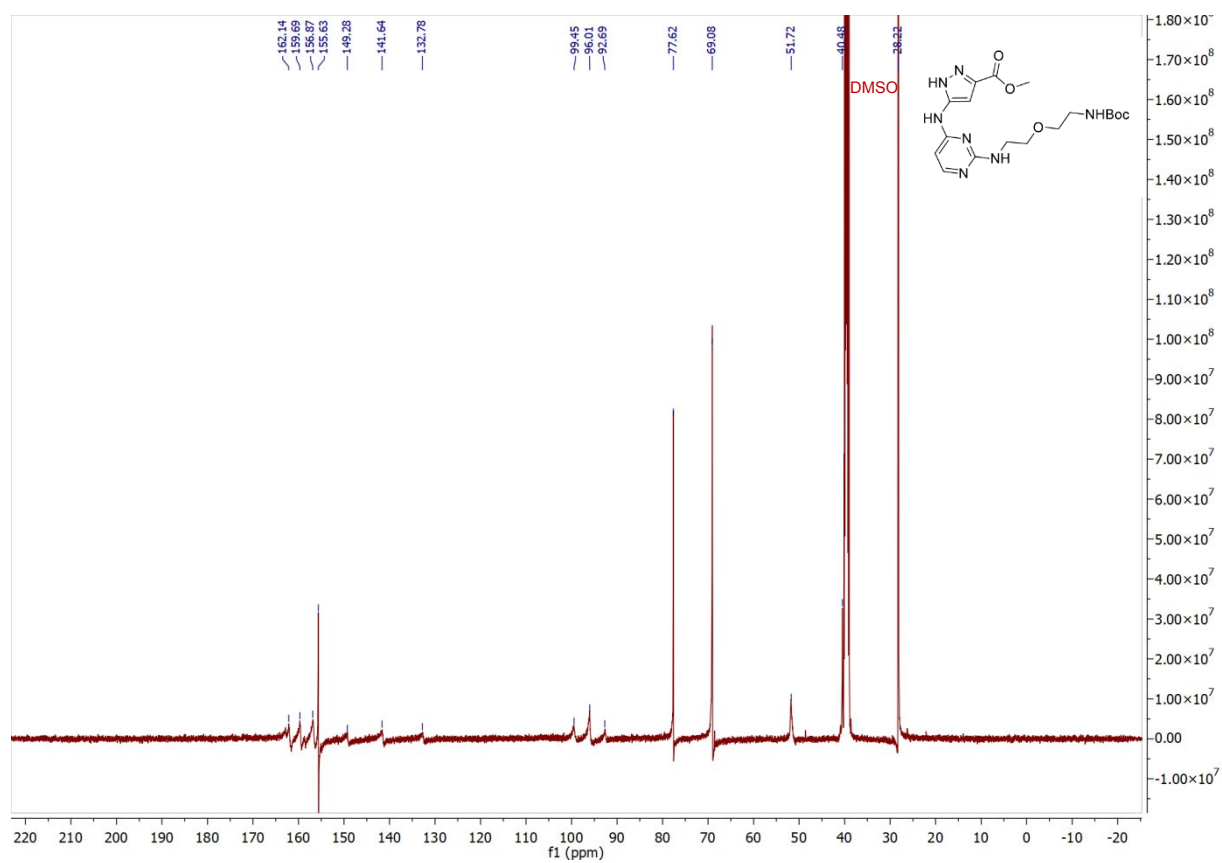

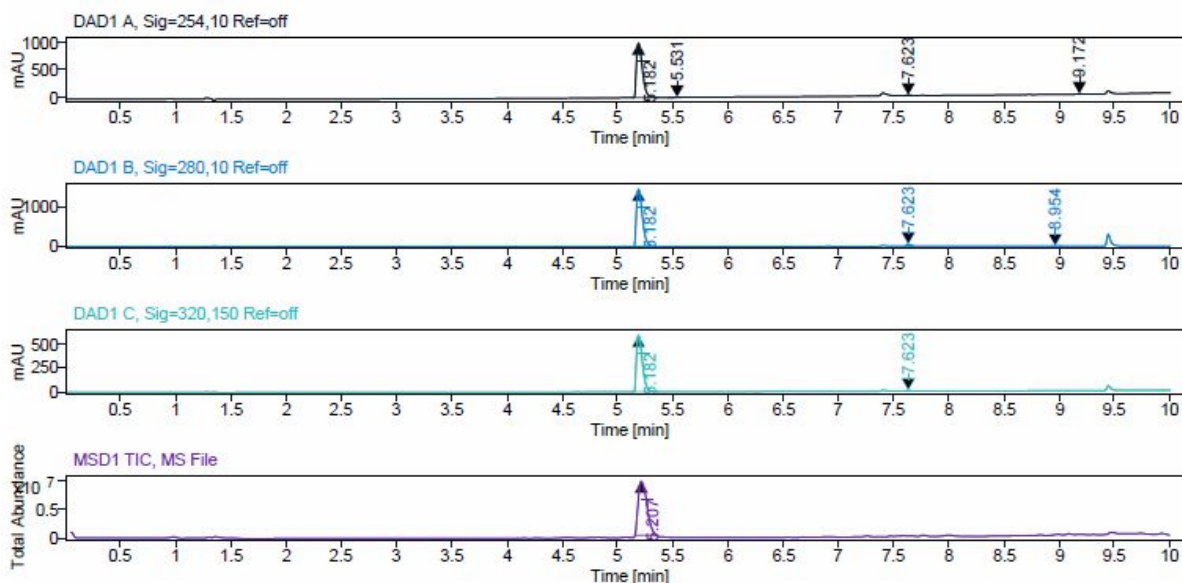

### Sample Purity

Signal Description DAD1 A, Sig=254,10 Ref=off

| Sample Name  | Name | RT    | Width | Area      | Area% | Height   |
|--------------|------|-------|-------|-----------|-------|----------|
| JA107_prepF1 |      | 5.182 | 0.059 | 3622.2283 | 98.01 | 971.3520 |
| JA107_prepF1 |      | 5.531 | 0.037 | 15.2247   | 0.41  | 6.1775   |
| JA107_prepF1 |      | 7.623 | 0.043 | 31.5078   | 0.85  | 11.2794  |
| JA107_prepF1 |      | 9.172 | 0.036 | 26.8967   | 0.73  | 11.0198  |

Max Area% 98.008

UV Signal Purity>95% **Pass**

Signal Description DAD1 B, Sig=280,10 Ref=off

| Sample Name  | Name | RT    | Width | Area      | Area% | Height    |
|--------------|------|-------|-------|-----------|-------|-----------|
| JA107_prepF1 |      | 5.182 | 0.059 | 5476.6074 | 97.28 | 1467.6888 |
| JA107_prepF1 |      | 7.623 | 0.040 | 127.1096  | 2.26  | 50.6332   |
| JA107_prepF1 |      | 8.954 | 0.038 | 25.9763   | 0.46  | 10.3502   |

Max Area% 97.281

UV Signal Purity>95% **Pass**

Signal Description DAD1 C, Sig=320,150 Ref=off

| Sample Name  | Name | RT    | Width | Area      | Area% | Height   |
|--------------|------|-------|-------|-----------|-------|----------|
| JA107_prepF1 |      | 5.182 | 0.059 | 2234.7620 | 98.84 | 598.5150 |
| JA107_prepF1 |      | 7.623 | 0.043 | 26.2908   | 1.16  | 9.6527   |

Max Area% 98.837

UV Signal Purity>95% **Pass**

ESI,  $^1\text{H}$ ,  $^{13}\text{C}$  NMR and HPLC data of compound **5e**.

JA104 #38-42 RT: 0.65-0.72 AV: 5 SB: 8 0.11-0.23 NL: 2.96E7  
 T: {0,0} + c ESI Icorona sid=75.00 det=1506.00 Full ms [105.00-800.00]

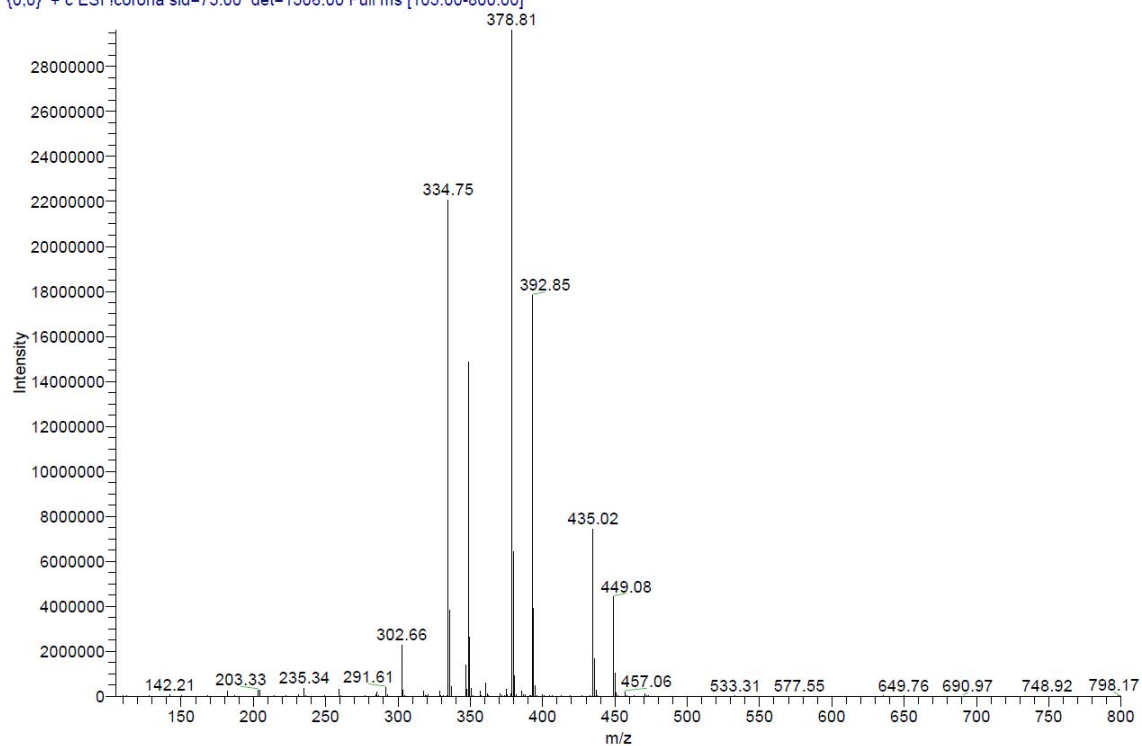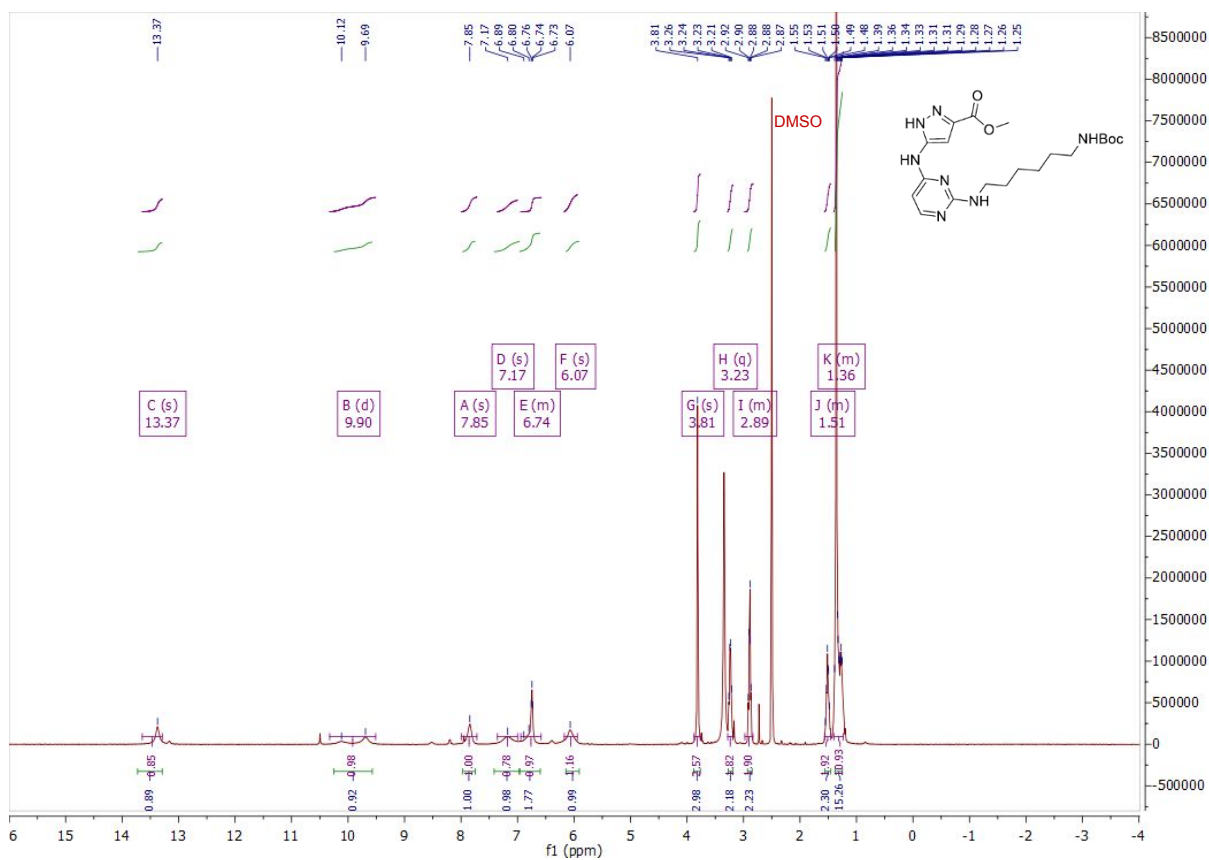

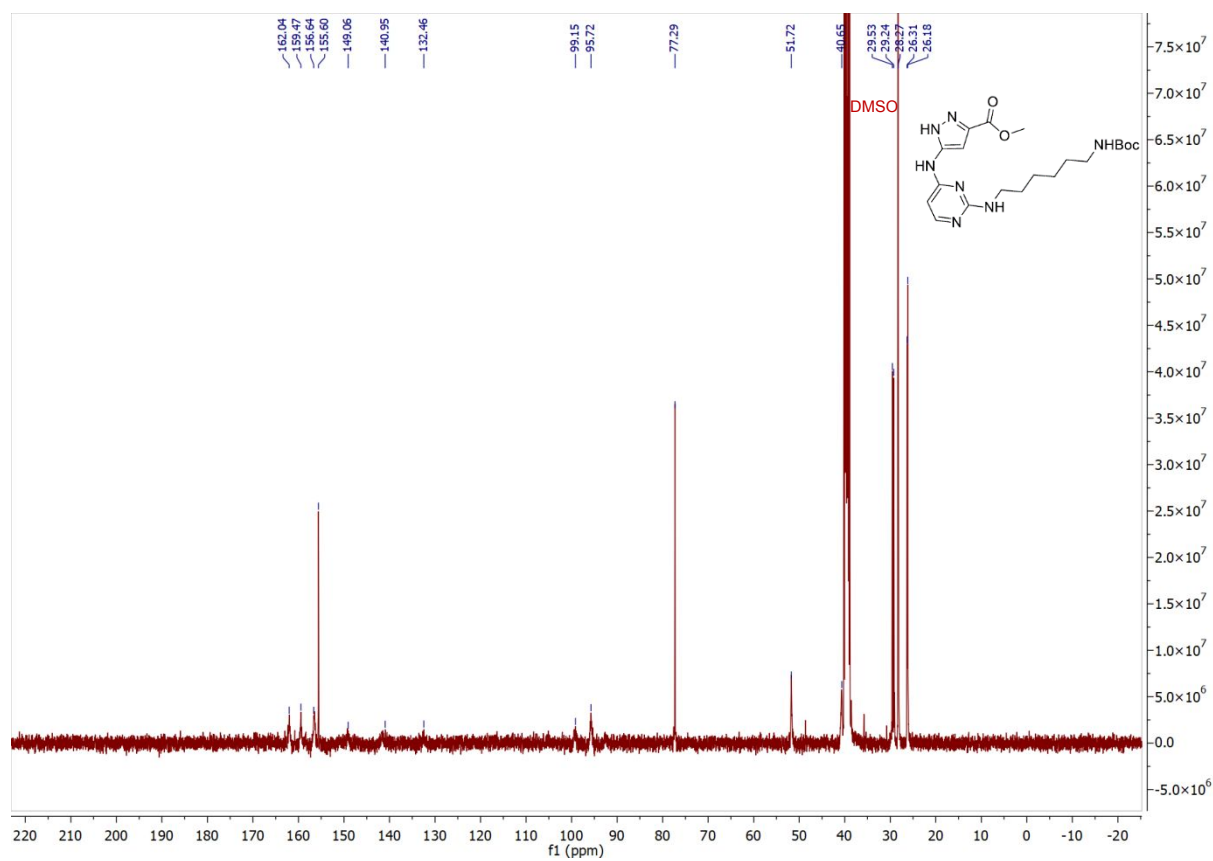

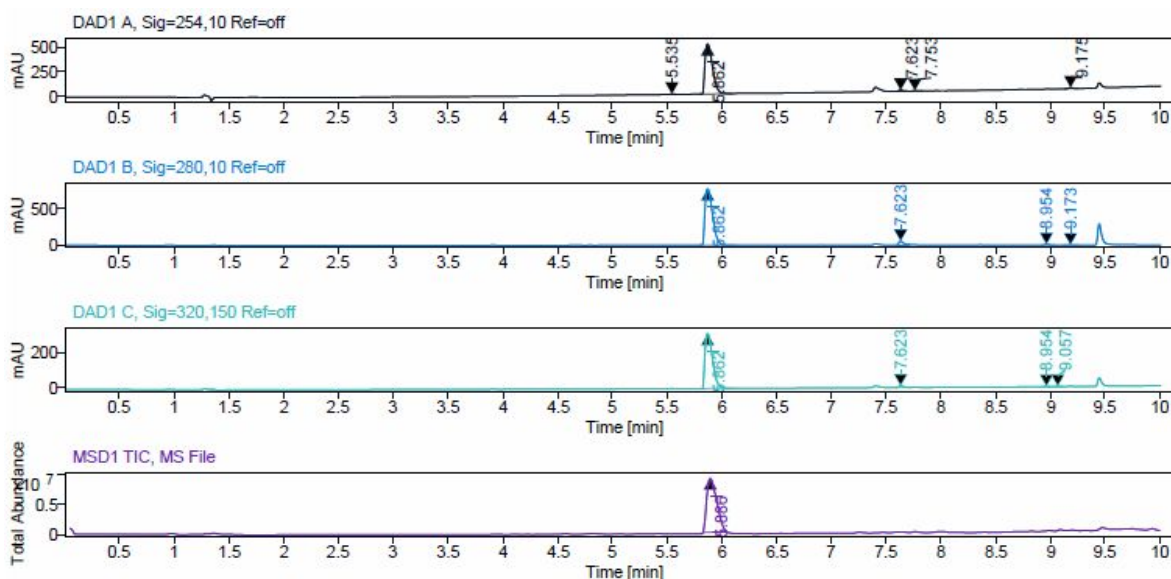

### Sample Purity

Signal Description DAD1 A, Sig=254,10 Ref=off

| Sample Name    | Name | RT    | Width | Area      | Area% | Height   |
|----------------|------|-------|-------|-----------|-------|----------|
| JA104_prep_F16 |      | 5.535 | 0.043 | 12.0778   | 0.49  | 4.3697   |
| JA104_prep_F16 |      | 5.862 | 0.077 | 2387.1487 | 96.52 | 503.9031 |
| JA104_prep_F16 |      | 7.623 | 0.044 | 31.3098   | 1.27  | 10.9434  |
| JA104_prep_F16 |      | 7.753 | 0.043 | 12.9726   | 0.52  | 4.7900   |
| JA104_prep_F16 |      | 9.175 | 0.038 | 29.5919   | 1.20  | 11.8123  |

Max Area% 96.525

UV Signal Purity>95% **Pass**

Signal Description DAD1 B, Sig=280,10 Ref=off

| Sample Name    | Name | RT    | Width | Area      | Area% | Height   |
|----------------|------|-------|-------|-----------|-------|----------|
| JA104_prep_F16 |      | 5.862 | 0.075 | 3681.2483 | 95.67 | 775.2848 |
| JA104_prep_F16 |      | 7.623 | 0.042 | 134.1460  | 3.49  | 49.4574  |
| JA104_prep_F16 |      | 8.954 | 0.039 | 23.7454   | 0.62  | 9.2409   |
| JA104_prep_F16 |      | 9.173 | 0.041 | 8.7145    | 0.23  | 2.9845   |

Max Area% 95.670

UV Signal Purity>95% **Pass**

Signal Description DAD1 C, Sig=320,150 Ref=off

| Sample Name    | Name | RT    | Width | Area      | Area% | Height   |
|----------------|------|-------|-------|-----------|-------|----------|
| JA104_prep_F16 |      | 5.862 | 0.076 | 1472.0709 | 97.47 | 310.0414 |
| JA104_prep_F16 |      | 7.623 | 0.044 | 26.6122   | 1.76  | 9.2569   |
| JA104_prep_F16 |      | 8.954 | 0.041 | 6.2512    | 0.41  | 2.4823   |
| JA104_prep_F16 |      | 9.057 | 0.034 | 5.3317    | 0.35  | 2.4078   |

Max Area% 97.471

UV Signal Purity>95% **Pass**





## ESI data of compound 7c.

JA68 #35-43 RT: 0.59-0.73 AV: 9 SB: 6 0.09-0.17 NL: 7.35E6  
T: {0,0} + c ESI Icorona sid=75.00 det=1506.00 Full ms [105.00-600.00]

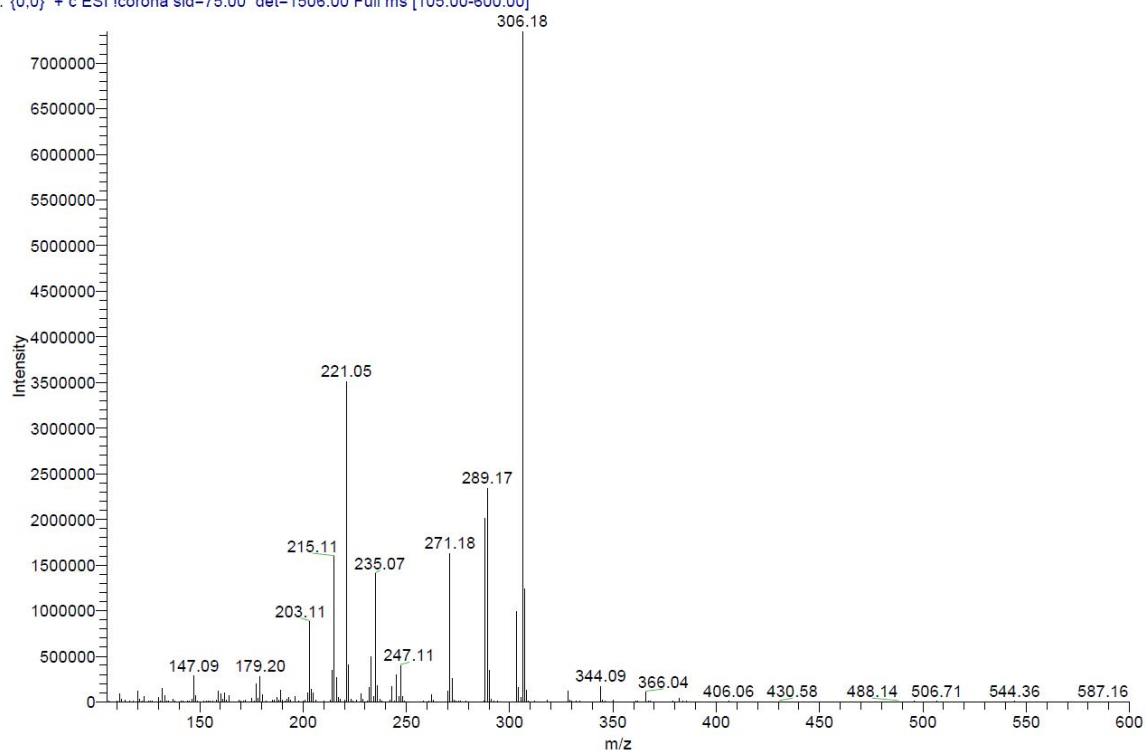

## ESI data of compound 7d.

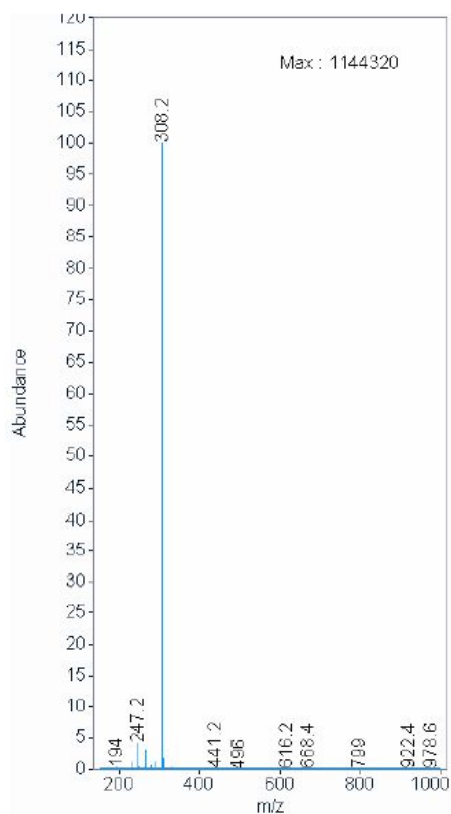

## ESI data of compound **7e**.

JA90 #39-43 RT: 0.66-0.73 AV: 5 SB: 13 0.07-0.28 NL: 3.09E7  
T: {0,0} + c ESI Icorona sid=75.00 det=1506.00 Full ms [105.00-600.00]

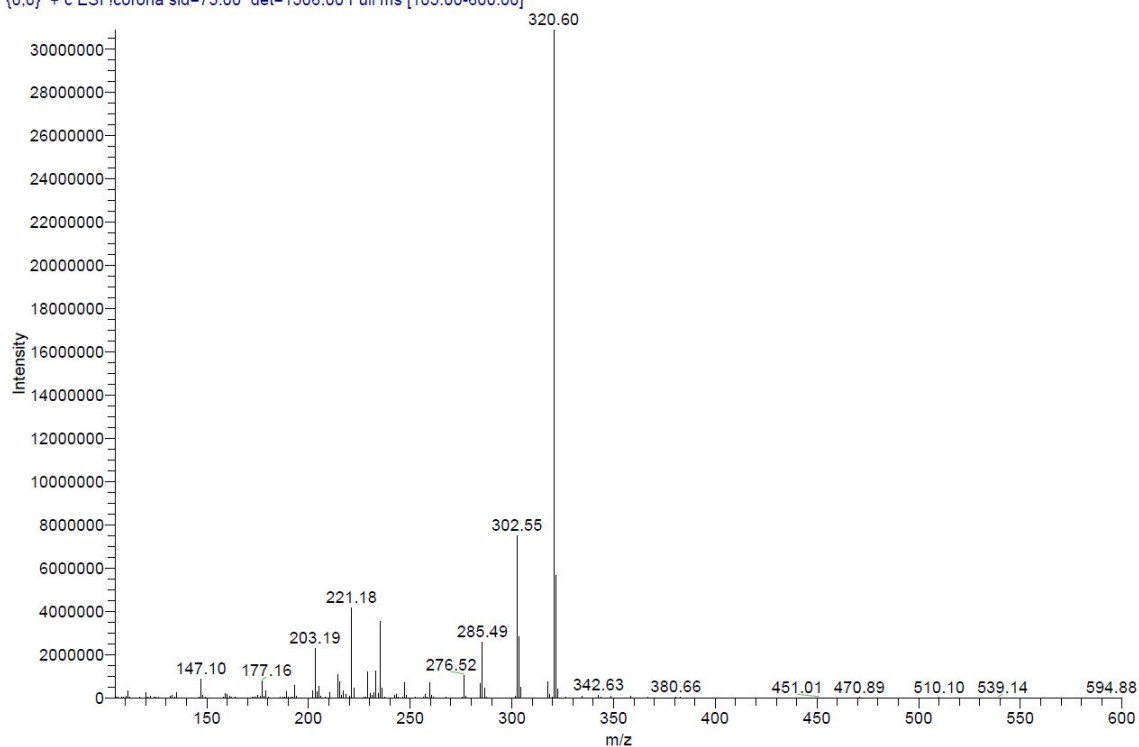

## ESI, HRMS, <sup>1</sup>H, <sup>13</sup>C NMR and HPLC data of compound **8a**.

JA93 #39-44 RT: 0.66-0.75 AV: 6 SB: 7 0.07-0.17 NL: 1.47E7  
T: {0,0} + c ESI Icorona sid=75.00 det=1506.00 Full ms [105.00-600.00]

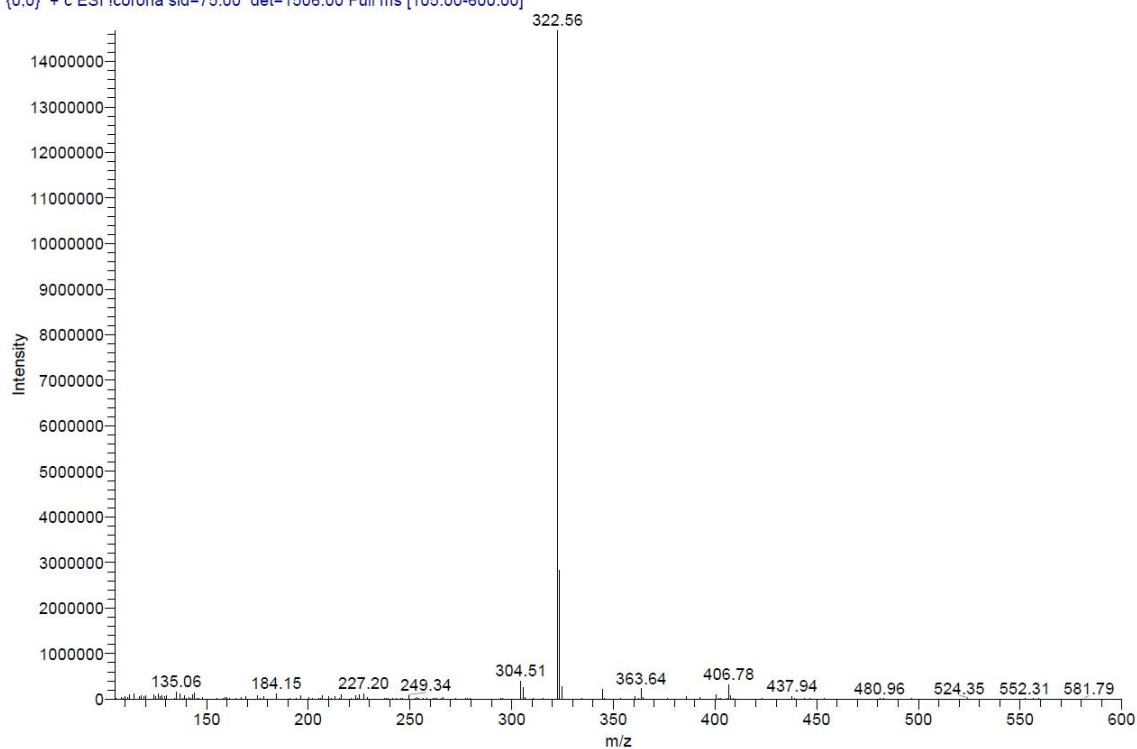

JA93\_B9 #1-18 RT: 0.00-0.64 AV: 18 NL: 3.86E4  
T: FTMS + p MALDI Full ms [200.00-600.00]

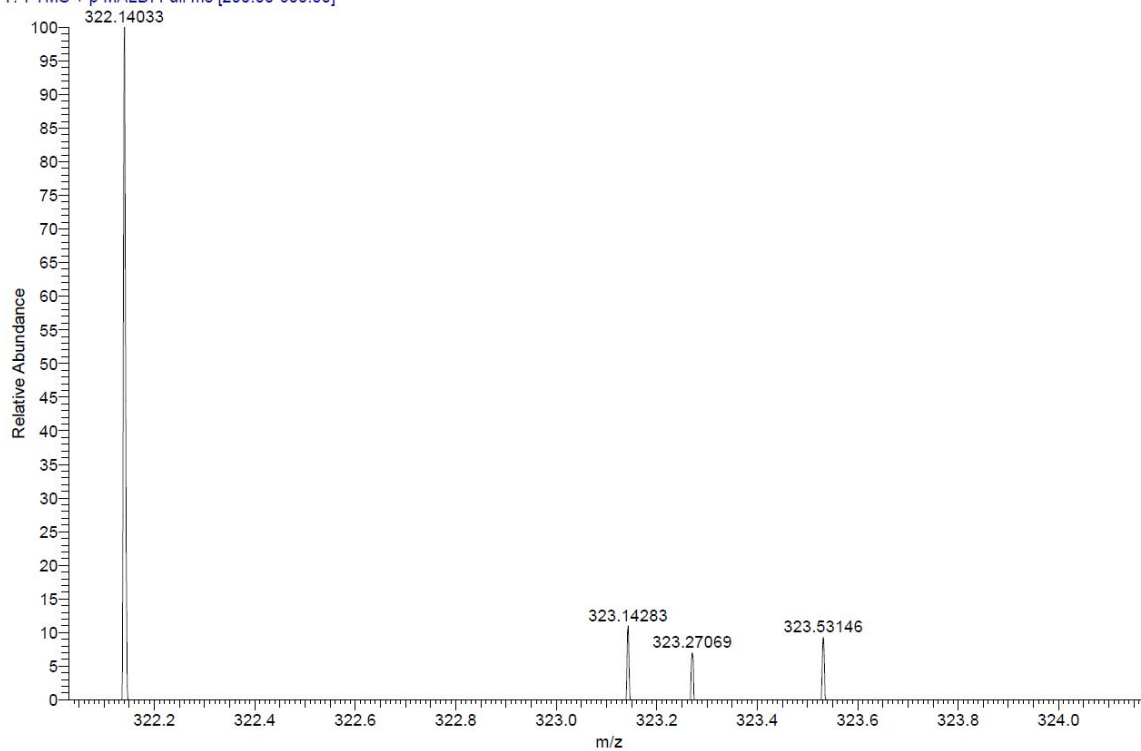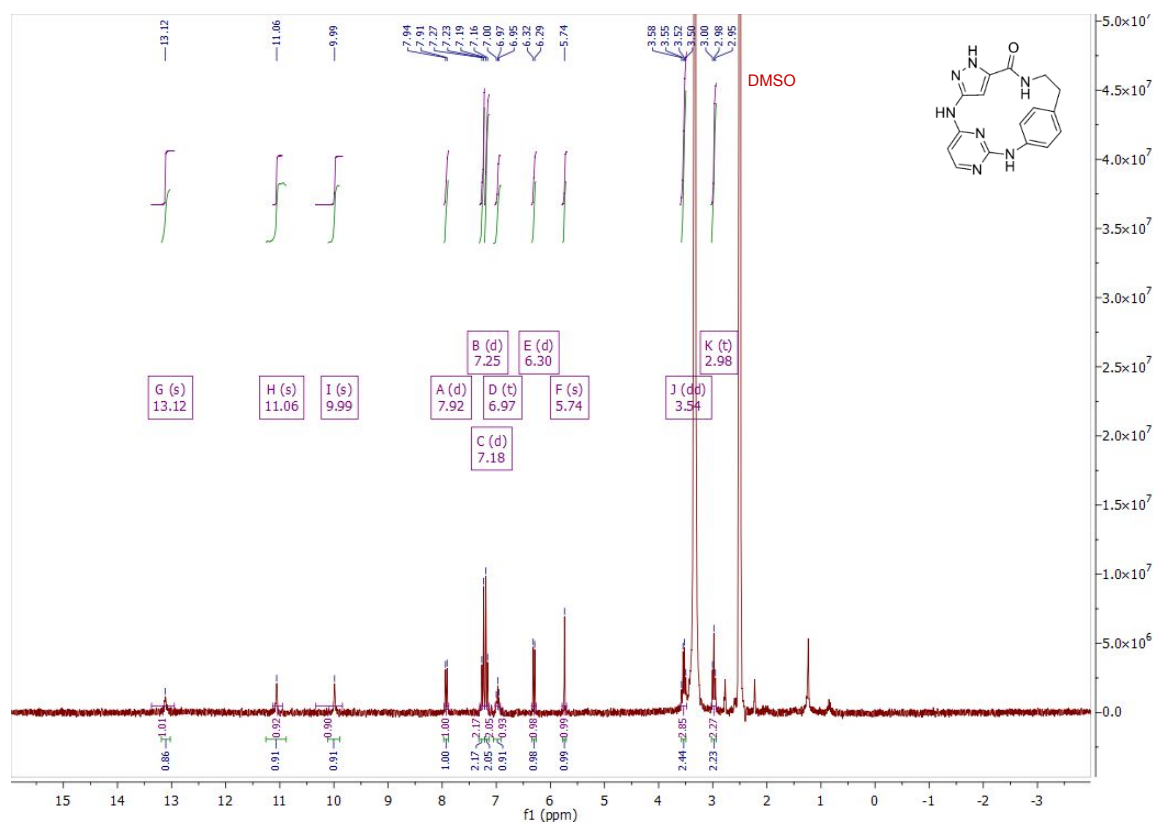

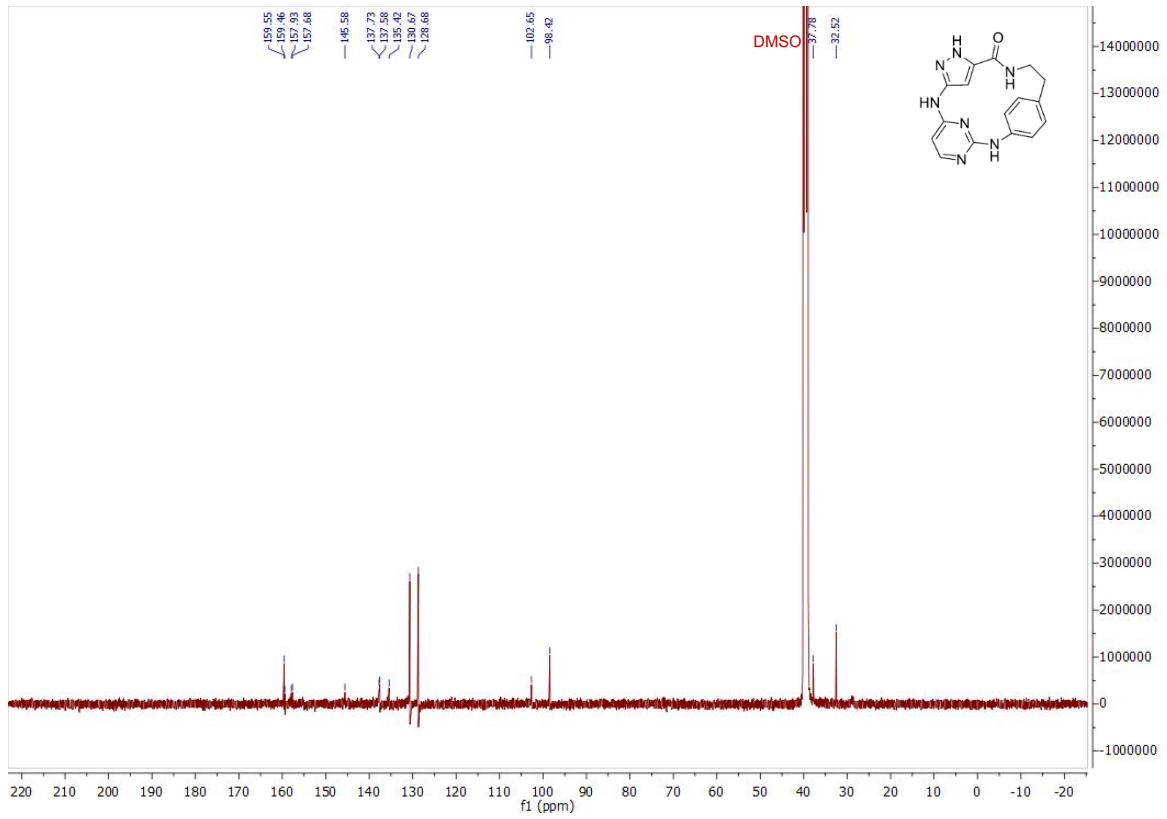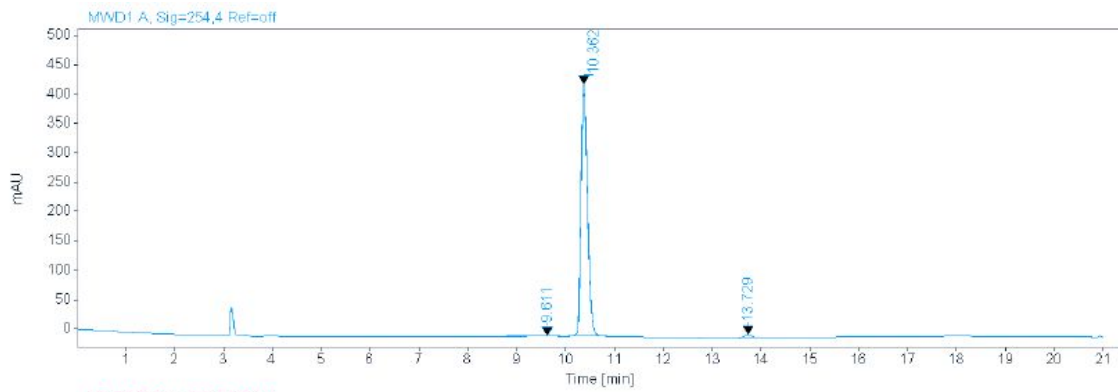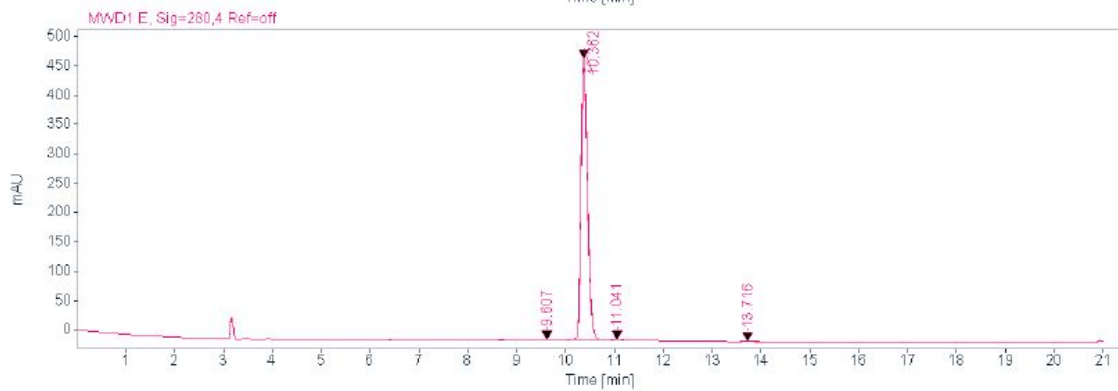

Signal: MWD1 A, Sig=254,4 Ref=off

| RT [min] | Type | Width [min] | Area      | Height   | Area%   | Name |
|----------|------|-------------|-----------|----------|---------|------|
| 9.611    | MM   | 0.8894      | 77.9974   | 1.4616   | 1.8454  |      |
| 10.362   | MM   | 0.1588      | 4086.1445 | 428.9523 | 96.6753 |      |
| 13.729   | MM   | 0.1831      | 62.5284   | 5.6921   | 1.4794  |      |
|          |      | Sum         | 4226.6704 |          |         |      |

Signal: MWD1 E, Sig=280,4 Ref=off

| RT [min] | Type | Width [min] | Area      | Height   | Area%   | Name |
|----------|------|-------------|-----------|----------|---------|------|
| 9.607    | MM   | 0.5428      | 44.7534   | 1.3741   | 0.9677  |      |
| 10.362   | MM   | 0.1581      | 4548.1382 | 479.3879 | 98.3392 |      |
| 11.041   | MM   | 0.1443      | 11.2091   | 1.2948   | 0.2424  |      |
| 13.716   | MM   | 0.1889      | 20.8503   | 1.8393   | 0.4508  |      |
|          |      | Sum         | 4624.9509 |          |         |      |

ESI, HRMS, <sup>1</sup>H, <sup>13</sup>C NMR and HPLC data of compound **8b**.

JA122 #36-41 RT: 0.61-0.69 AV: 6 SB: 15 0.07-0.31 NL: 1.70E7  
T: (0,0) + c ESI Icorona sid=75.00 det=1600.00 Full ms [100.00-600.00]

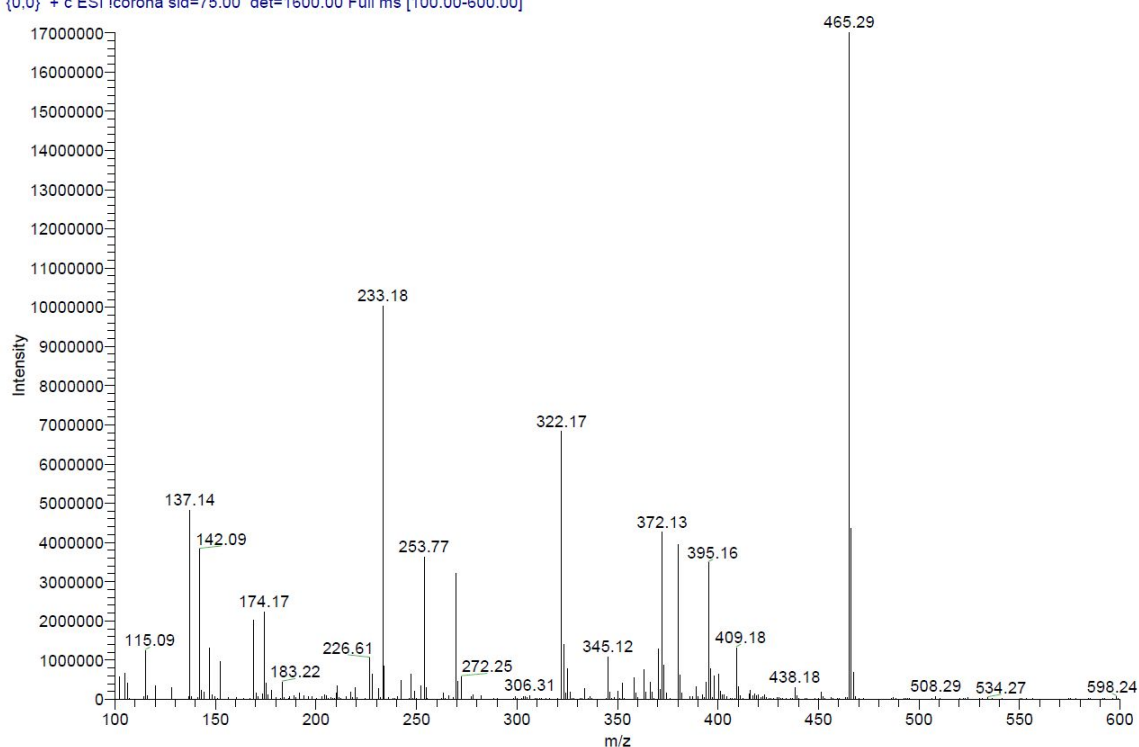

JA122\_E9 #1-19 RT: 0.00-1.58 AV: 19 NL: 1.40E6  
 T: FTMS + p MALDI Full ms [200.00-400.00]

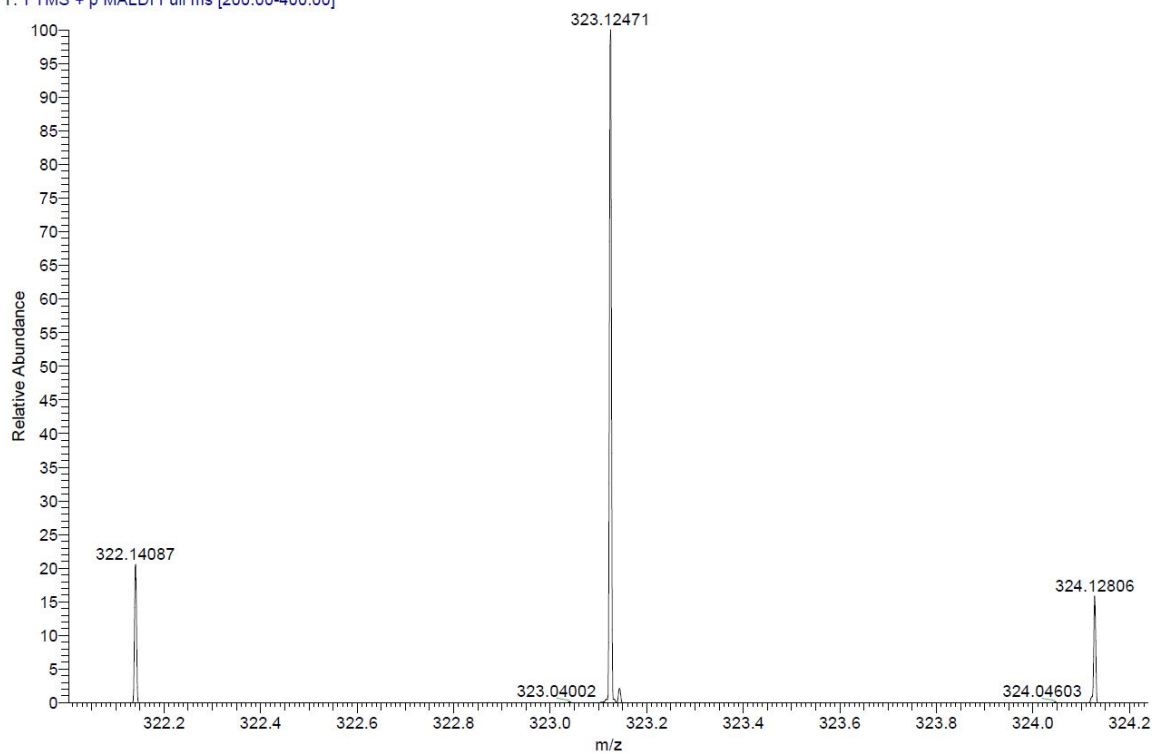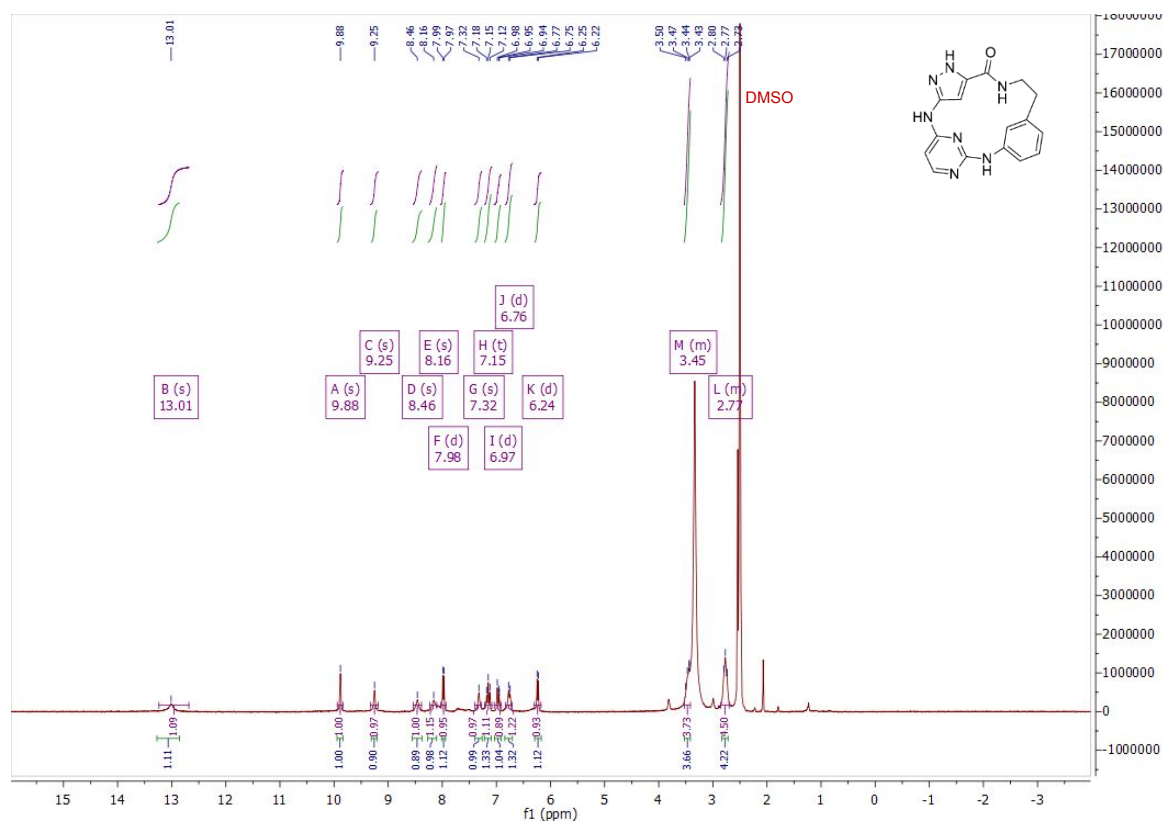

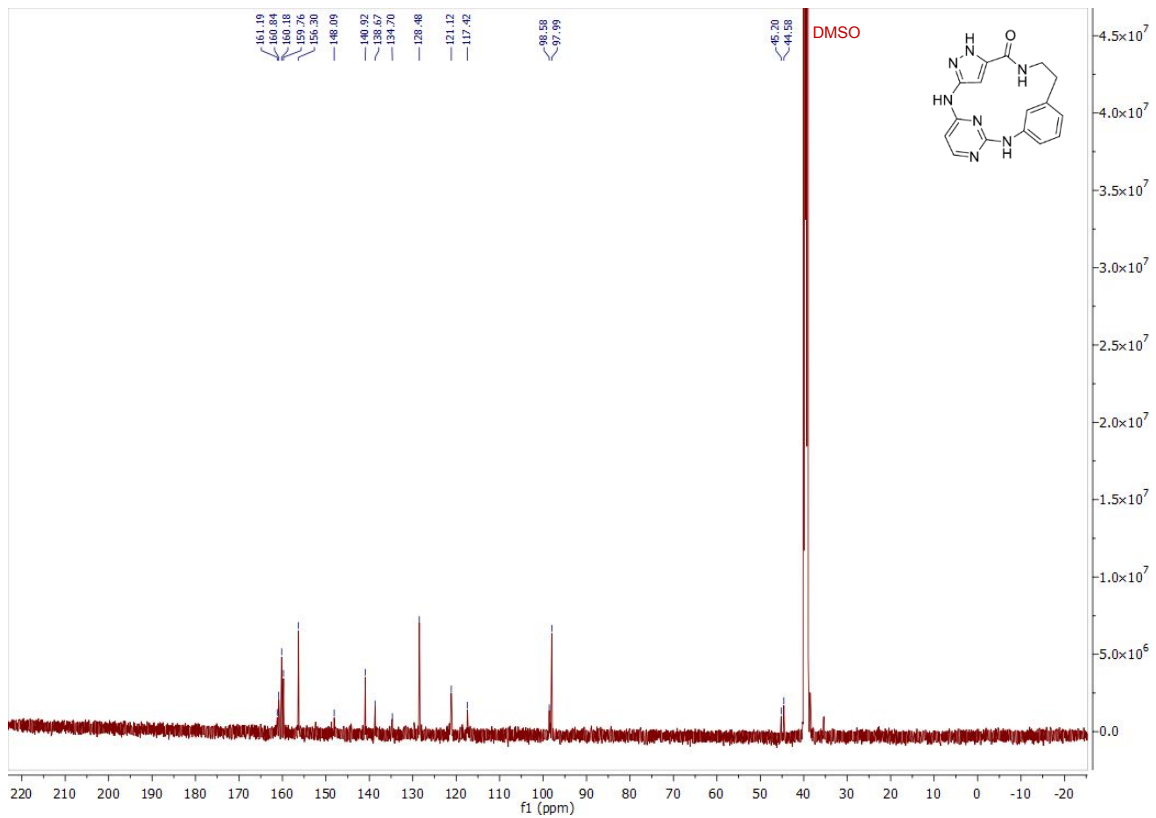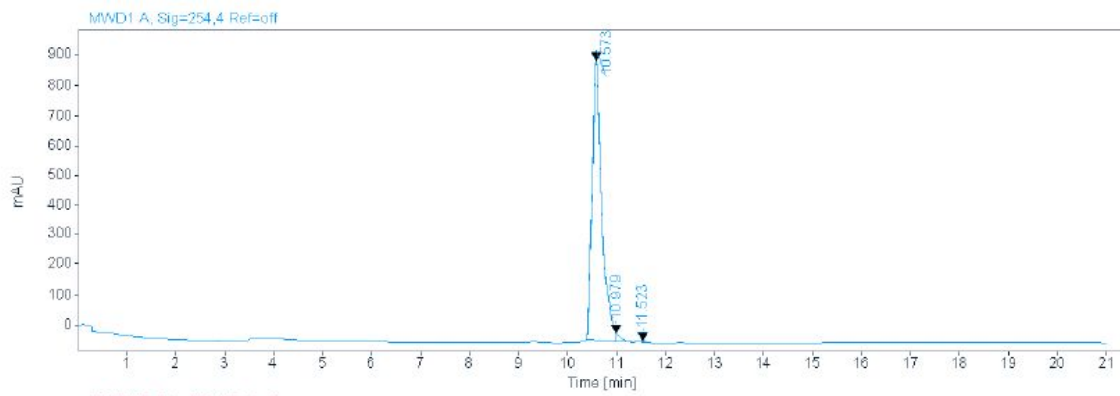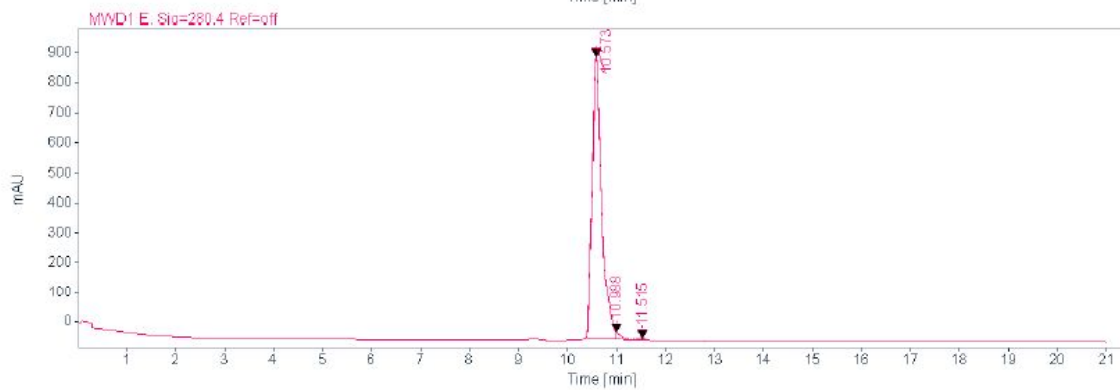



Signal: MWD1 A, Sig=254,4 Ref=off

| RT [min] | Type | Width [min] | Area       | Height   | Area%   | Name |
|----------|------|-------------|------------|----------|---------|------|
| 10.573   | MF   | 0.2262      | 12645.9326 | 931.8766 | 98.1447 |      |
| 10.979   | FM   | 0.1185      | 186.5474   | 26.2475  | 1.4478  |      |
| 11.523   | MM   | 0.1820      | 52.5069    | 4.8093   | 0.4075  |      |
|          | Sum  |             | 12884.9869 |          |         |      |

Signal: MWD1 E, Sig=280,4 Ref=off

| RT [min] | Type | Width [min] | Area       | Height   | Area%   | Name |
|----------|------|-------------|------------|----------|---------|------|
| 10.573   | MF   | 0.2245      | 12704.6367 | 943.0483 | 98.3864 |      |
| 10.988   | FM   | 0.1119      | 147.2023   | 21.9317  | 1.1400  |      |
| 11.515   | MM   | 0.1890      | 61.1598    | 5.3930   | 0.4736  |      |
|          | Sum  |             | 12912.9988 |          |         |      |

ESI, HRMS, <sup>1</sup>H, <sup>13</sup>C NMR and HPLC data of compound **8c**.

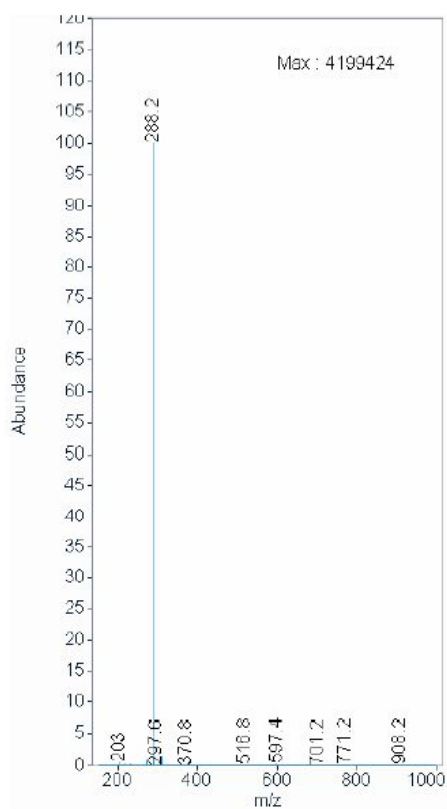

JA71\_D12 #1-11 RT: 0.00-0.93 AV: 11 NL: 1.00E7  
 T: FTMS + p MALDI Full ms [250.00-400.00]

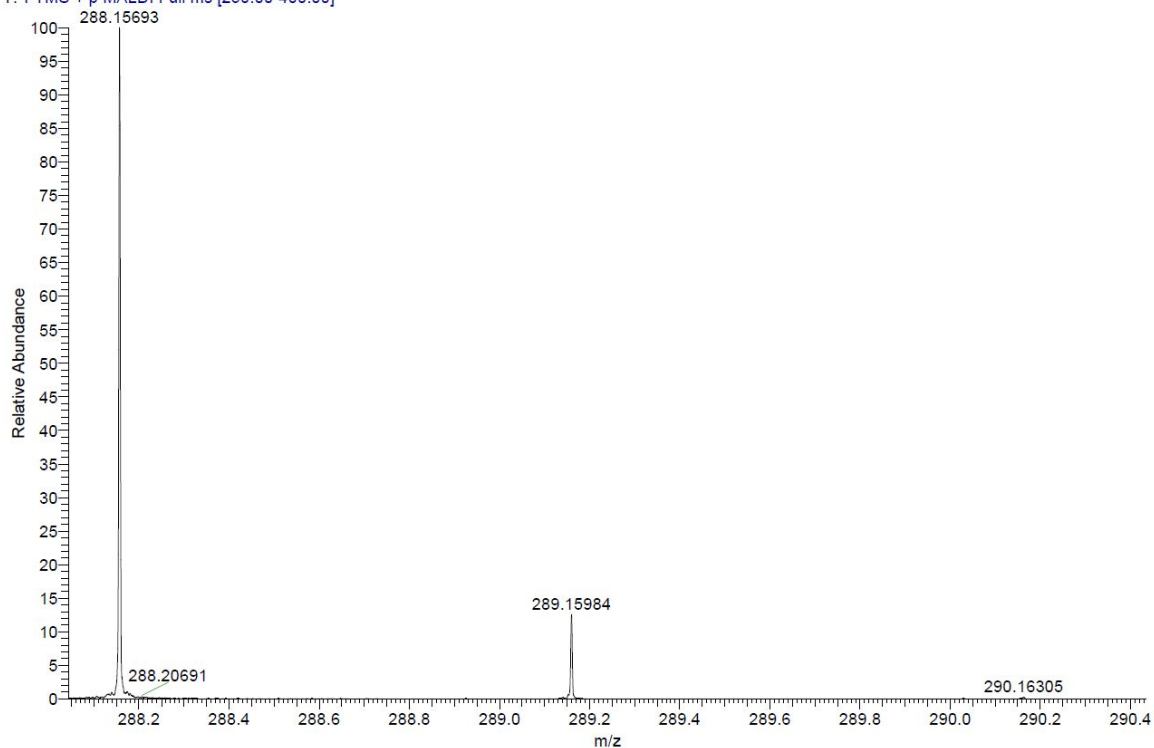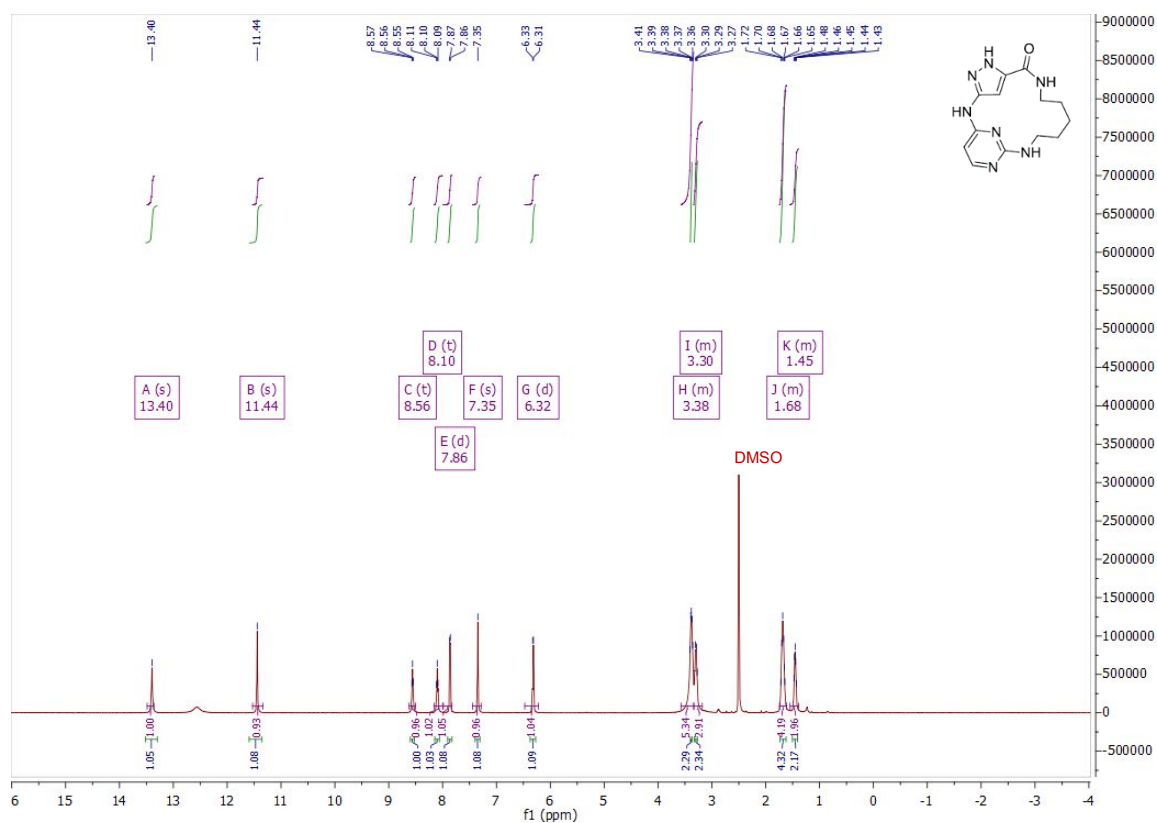

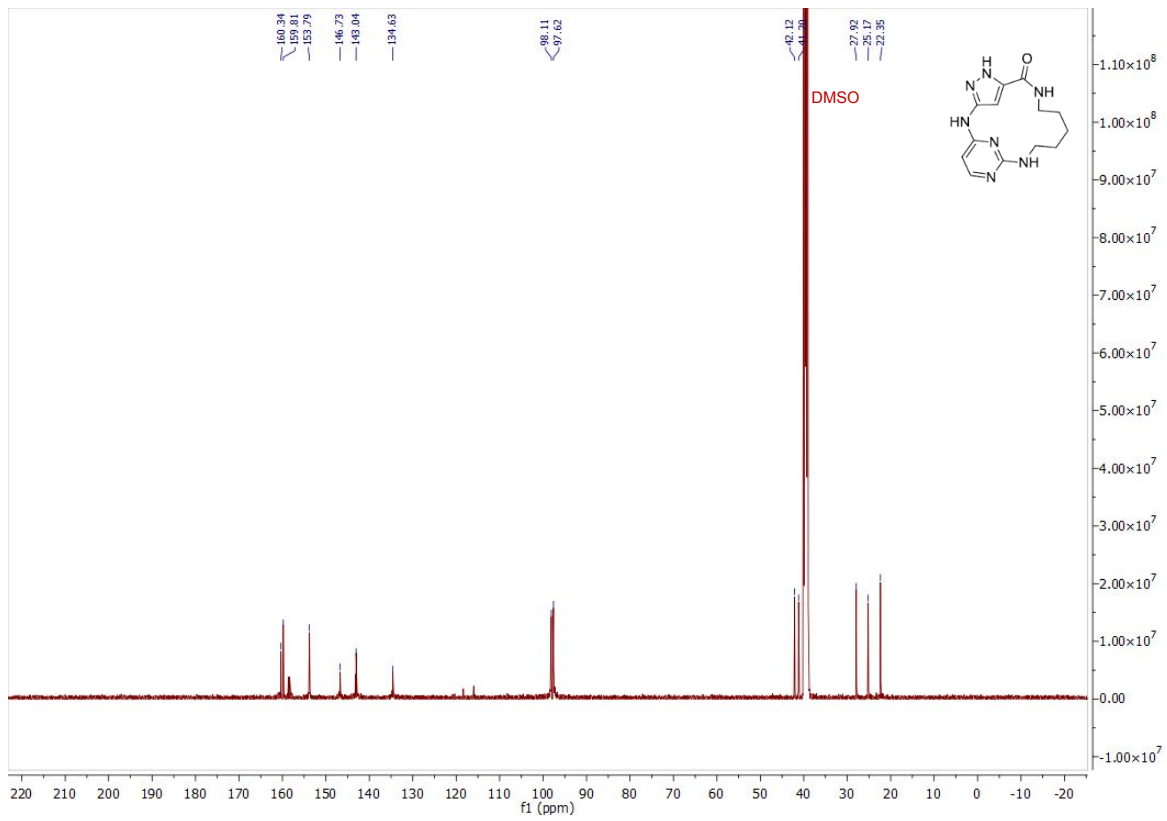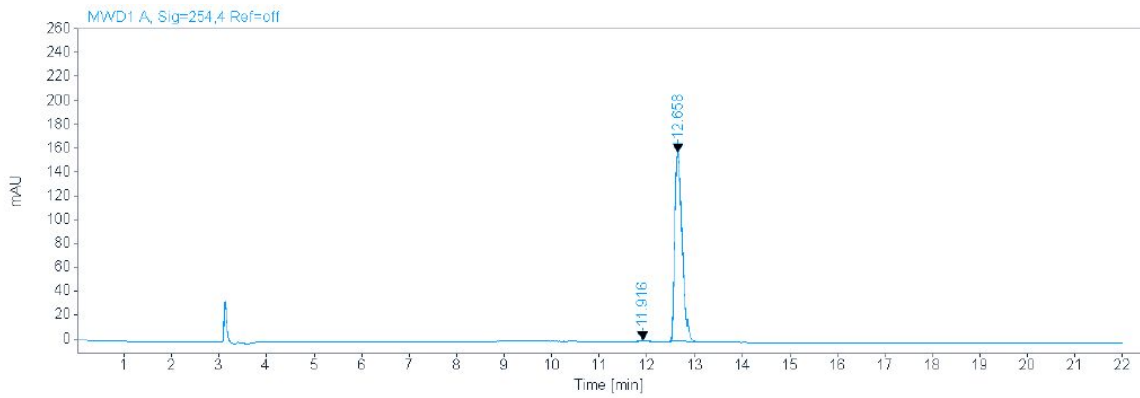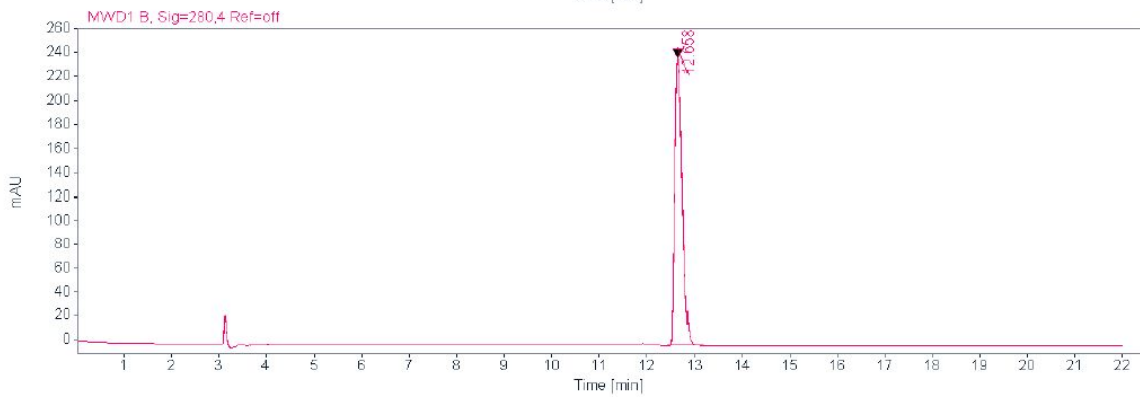

Signal: MWD1 A, Sig=254,4 Ref=off

| RT [min] | Type | Width [min] | Area      | Height   | Area%   | Name |
|----------|------|-------------|-----------|----------|---------|------|
| 11.916   | MM   | 0.1592      | 10.7461   | 1.1248   | 0.6305  |      |
| 12.658   | BB   | 0.1635      | 1693.7252 | 158.7199 | 99.3695 |      |
|          | Sum  |             | 1704.4713 |          |         |      |

Signal: MWD1 B, Sig=280,4 Ref=off

| RT [min] | Type | Width [min] | Area      | Height   | Area%    | Name |
|----------|------|-------------|-----------|----------|----------|------|
| 12.658   | BB   | 0.1629      | 2562.1594 | 241.2934 | 100.0000 |      |
|          | Sum  |             | 2562.1594 |          |          |      |

ESI, HRMS, <sup>1</sup>H and HPLC data of compound **8d**.

JA115 #38-43 RT: 0.64-0.73 AV: 6 SB: 16 0.07-0.33 NL: 2.06E7  
T: {0,0} + c ESI Icorona sid=75.00 det=1600.00 Full ms [100.00-500.00]

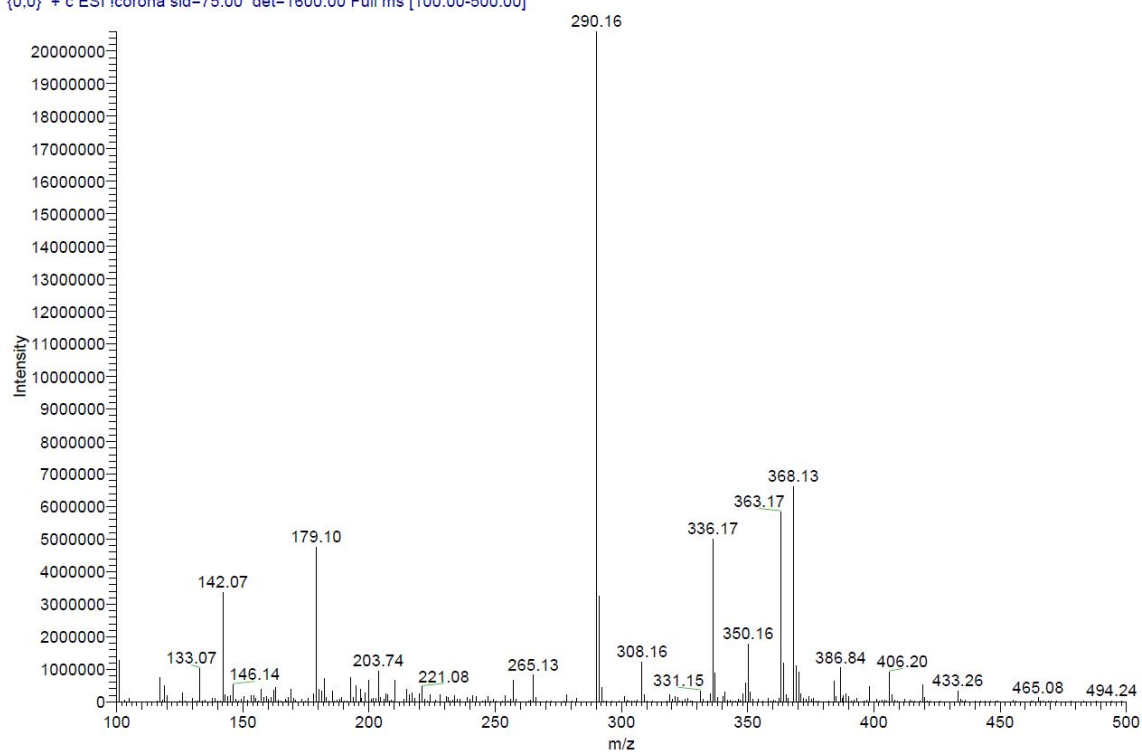

JA115\_E6 #1-8 RT: 0.01-0.64 AV: 8 NL: 7.33E5  
T: FTMS + p MALDI Full ms [200.00-400.00]

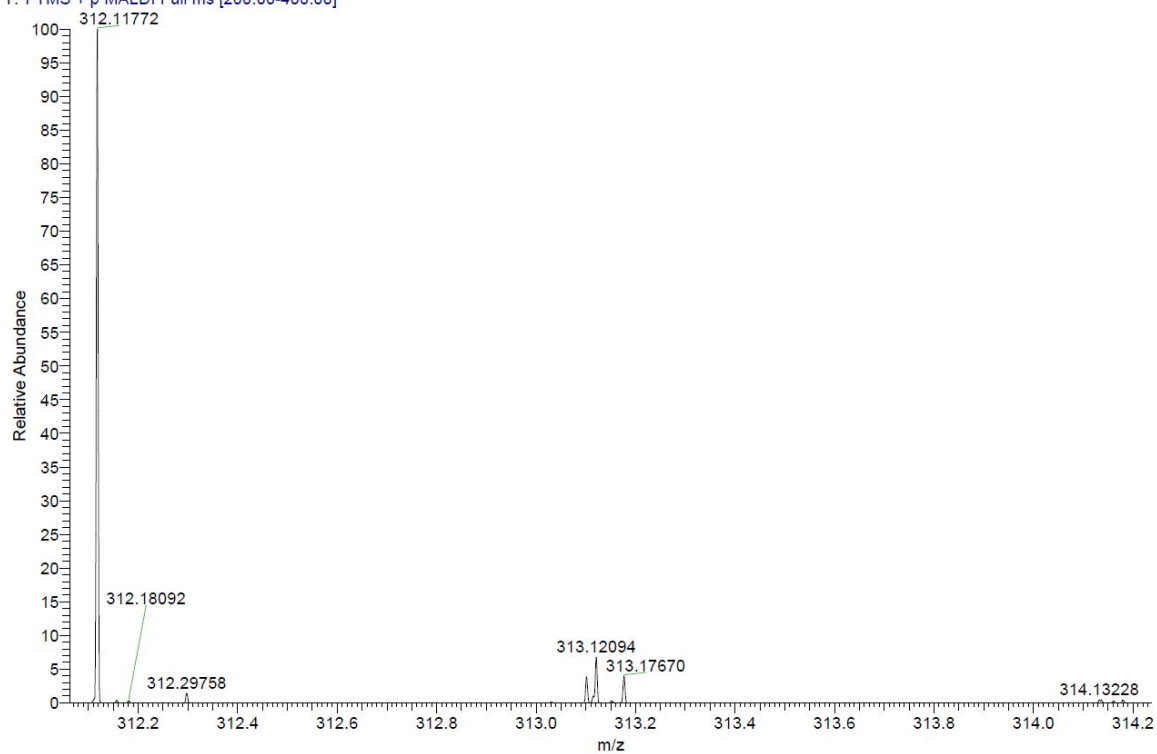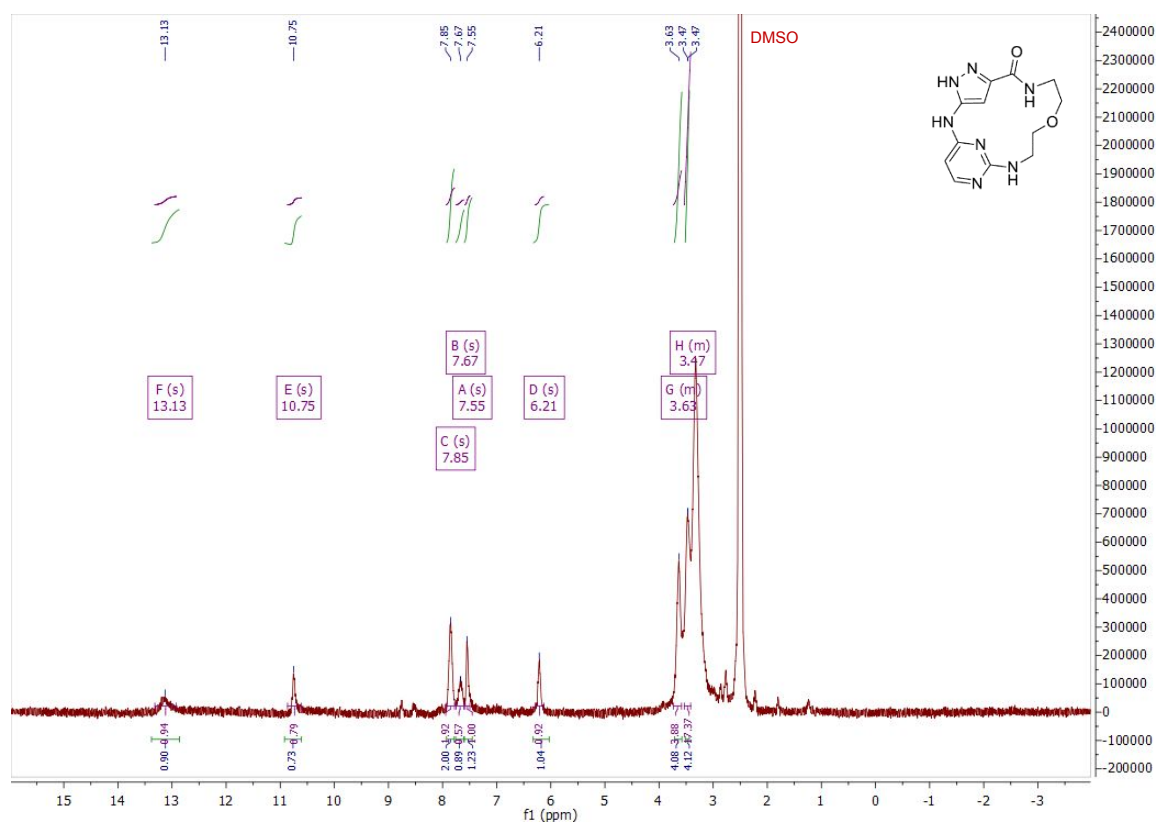

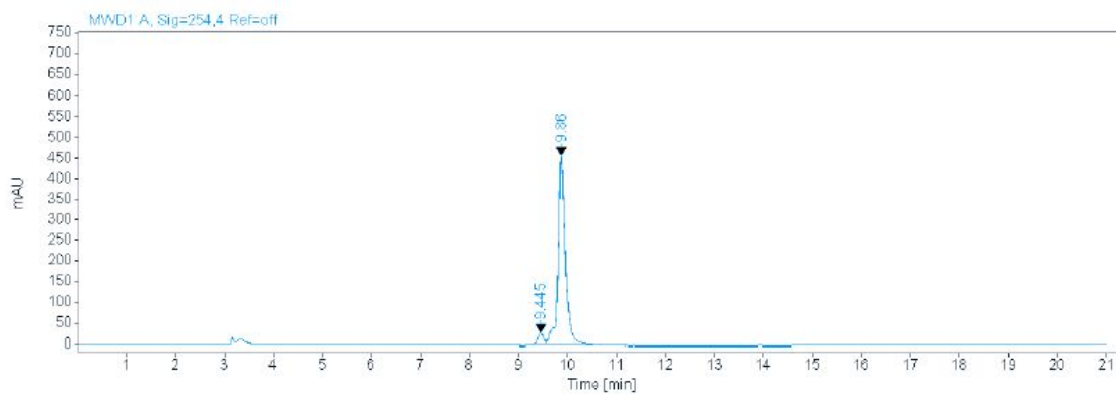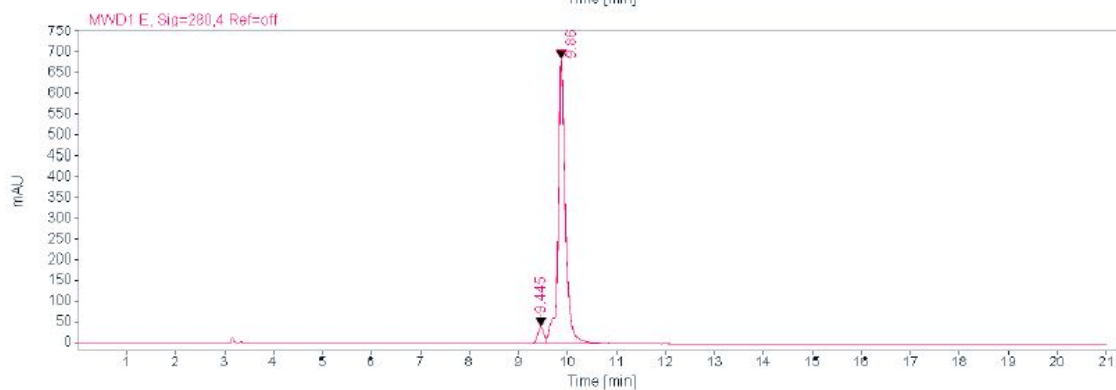

Signal: MWD1 A, Sig=254,4 Ref=off

| RT [min] | Type | Width [min] | Area      | Height   | Area%   | Name |
|----------|------|-------------|-----------|----------|---------|------|
| 9.445    | MF   | 0.1440      | 238.0683  | 27.5513  | 4.8982  |      |
| 9.860    | FM   | 0.1687      | 4622.2915 | 456.7866 | 95.1018 |      |
|          |      | Sum         | 4860.3598 |          |         |      |

Signal: MWD1 E, Sig=280,4 Ref=off

| RT [min] | Type | Width [min] | Area      | Height   | Area%   | Name |
|----------|------|-------------|-----------|----------|---------|------|
| 9.445    | MF   | 0.1484      | 359.6102  | 40.3998  | 4.8889  |      |
| 9.860    | FM   | 0.1702      | 6996.0698 | 684.9609 | 95.1111 |      |
|          |      | Sum         | 7355.6800 |          |         |      |

# ESI, HRMS, <sup>1</sup>H, <sup>13</sup>C NMR and HPLC data of compound **8e**.

JA94 #40-44 RT: 0.68-0.74 AV: 5 SB: 9 0.07-0.21 NL: 2.13E7  
T: {0.0} + c ESI Icorona sid=75.00 det=1506.00 Full ms [105.00-600.00]

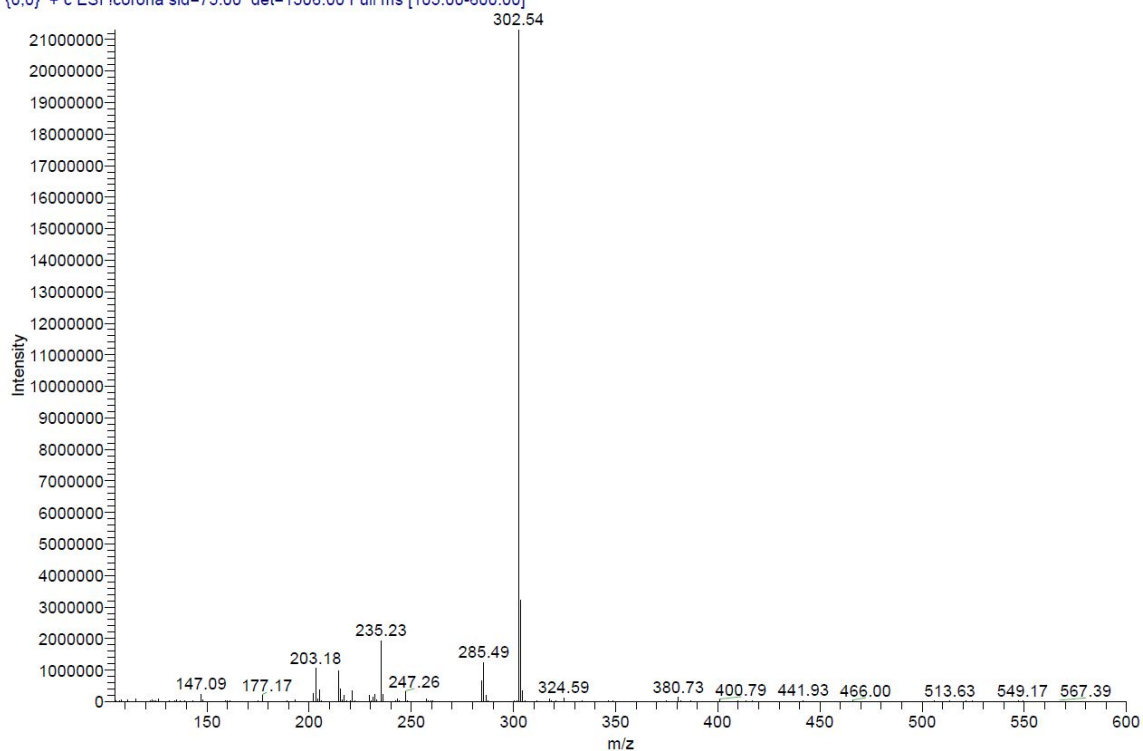

JA94\_B10 #1-2 RT: 0.00-0.04 AV: 2 NL: 7.46E7  
T: FTMS + p MALDI Full ms [200.00-600.00]

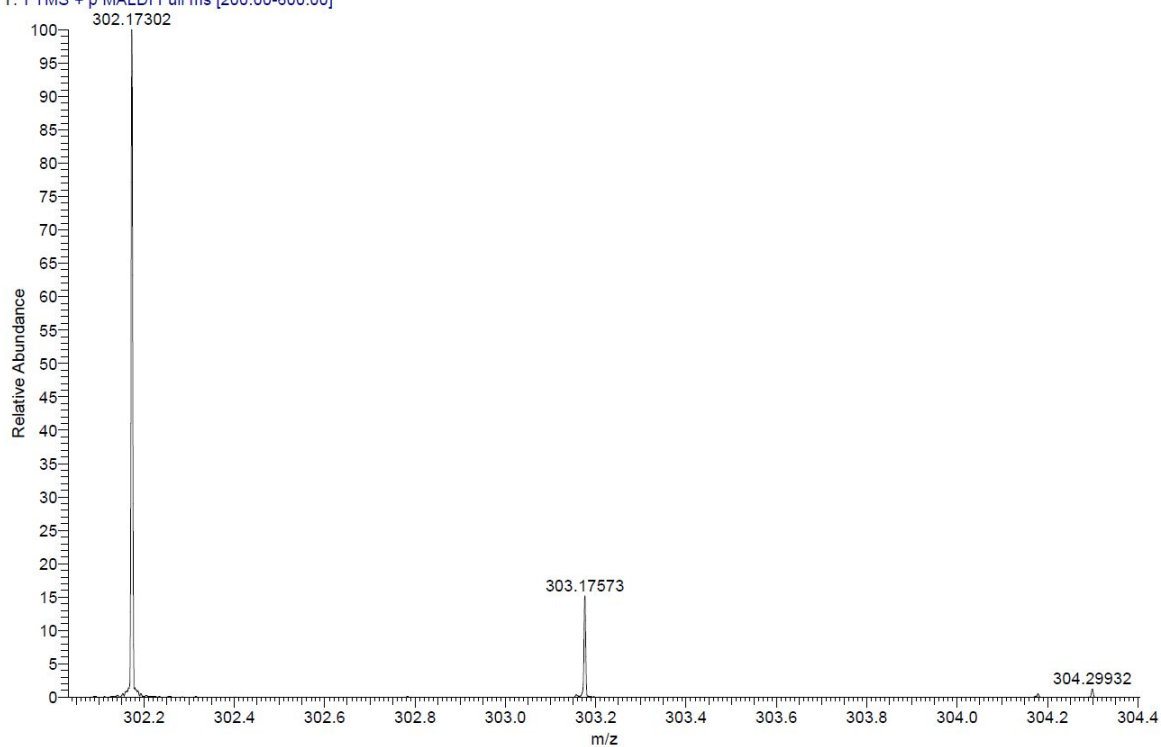

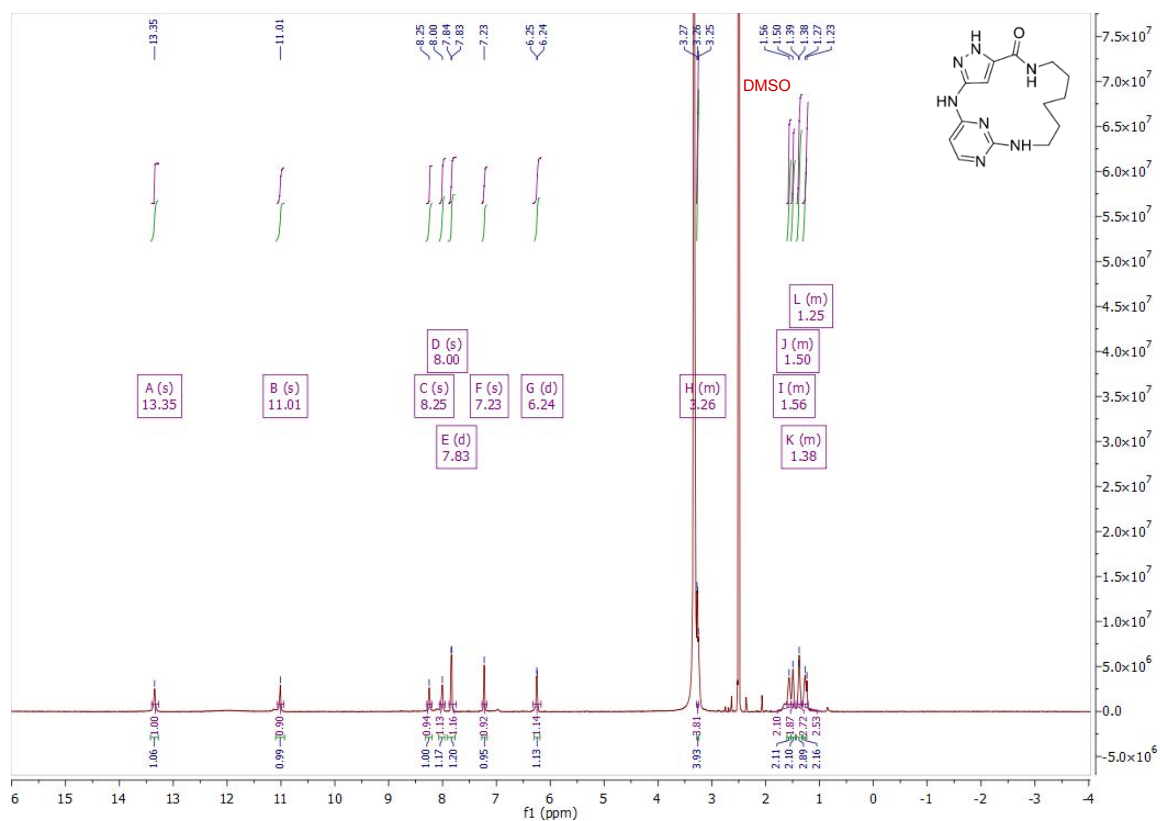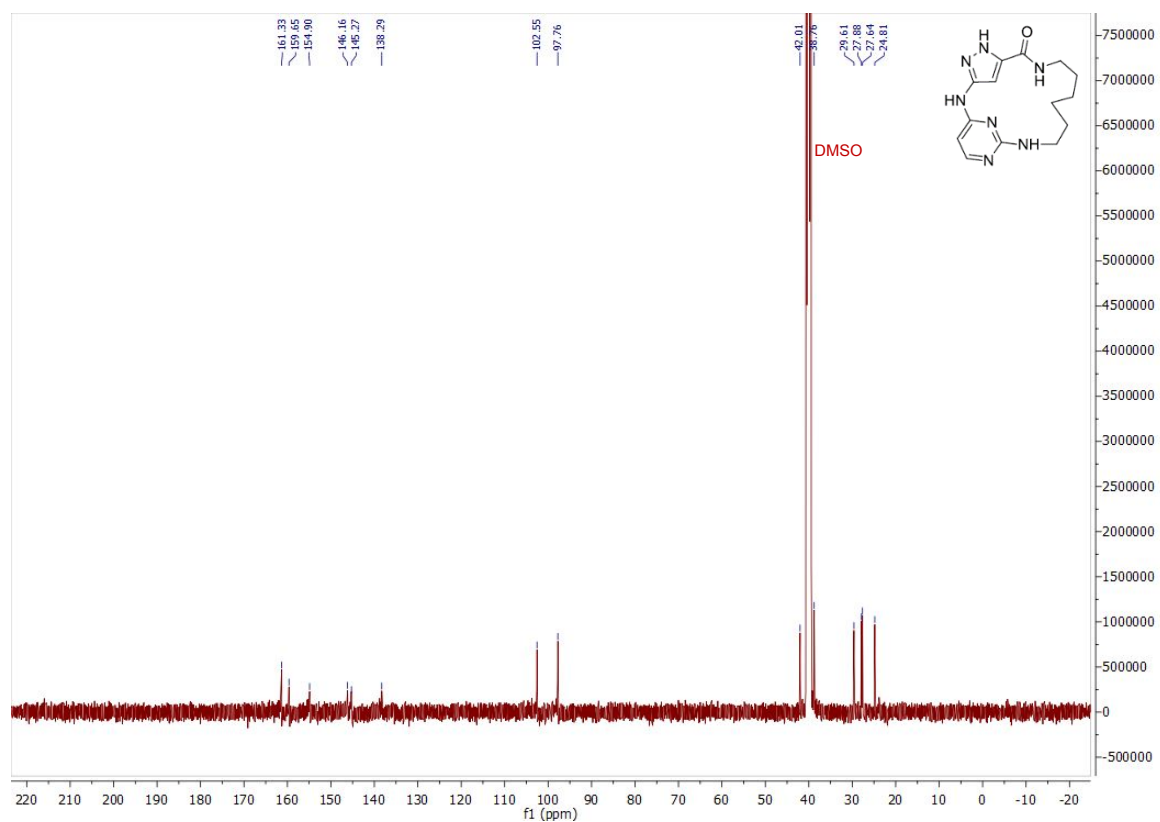



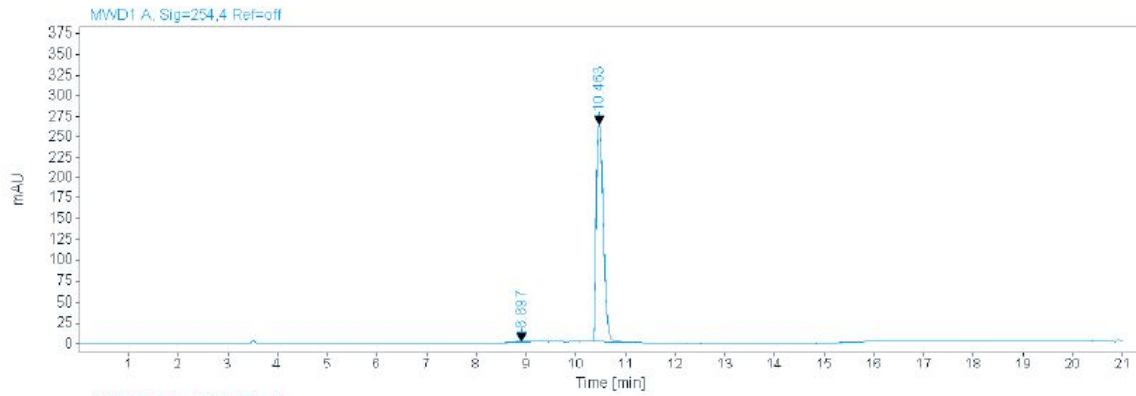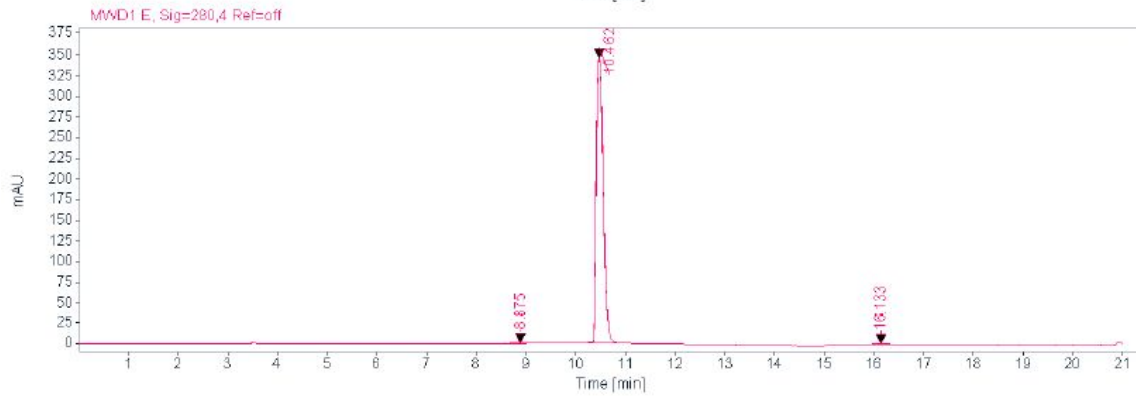

Signal: MWD1 A, Sig=254,4 Ref=off

| RT [min] | Type | Width [min] | Area      | Height   | Area%   | Name |
|----------|------|-------------|-----------|----------|---------|------|
| 8.897    | MM   | 0.5393      | 47.0867   | 1.4552   | 1.7937  |      |
| 10.463   | VV   | 0.1582      | 2578.0837 | 263.4731 | 98.2063 |      |
|          | Sum  |             | 2625.1704 |          |         |      |

Signal: MWD1 E, Sig=280,4 Ref=off

| RT [min] | Type | Width [min] | Area      | Height   | Area%   | Name |
|----------|------|-------------|-----------|----------|---------|------|
| 8.875    | MM   | 0.5720      | 46.9116   | 1.3668   | 1.3633  |      |
| 10.462   | VB   | 0.1565      | 3344.0491 | 346.7501 | 97.1821 |      |
| 16.133   | MM   | 0.3865      | 50.0530   | 2.1585   | 1.4546  |      |
|          | Sum  |             | 3441.0137 |          |         |      |

- (1) Robers, M. B.; Wilkinson, J. M.; Vasta, J. D.; Berger, L. M.; Berger, B. T.; Knapp, S. Single Tracer-Based Protocol for Broad-Spectrum Kinase Profiling in Live Cells with NanoBRET. *STAR Protoc.* **2021**, 2 (4), 100822.
- (2) Forli, S.; Huey, R.; Pique, M. E.; Sanner, M. F.; Goodsell, D. S.; Olson, A. J. Computational Protein-Ligand Docking and Virtual Drug Screening with the AutoDock Suite. *Nat Protoc.* **2016**, 11 (5), 905–919.
- (3) Eberhardt, J.; Santos-Martins, D.; Tillack, A. F.; Forli, S. AutoDock Vina 1.2.0: New Docking Methods, Expanded Force Field, and Python Bindings. *J Chem Inf Model* **2021**, 61 (8), 3891–3898.
- (4) Word, J. M.; Lovell, S. C.; Richardson, J. S.; Richardson, D. C. Asparagine and Glutamine: Using Hydrogen Atom Contacts in the Choice of Side-Chain Amide Orientation. *J Mol Biol* **1999**, 285 (4), 1735–1747.
- (5) Ravindranath, P. A.; Forli, S.; Goodsell, D. S.; Olson, A. J.; Sanner, M. F. AutoDockFR: Advances in Protein-Ligand Docking with Explicitly Specified Binding Site Flexibility. *PLoS Comput Biol* **2015**, 11 (12), e1004586.
- (6) Zhang, Y.; Forli, S.; Omelchenko, A.; Sanner, M. F. AutoGridFR: Improvements on AutoDock Affinity Maps and Associated Software Tools. *J Comput Chem* **2019**, 40 (32), 2882–2886.
- (7) Schrödinger, L.; DeLano, W. PyMol. 2020.
- (8) Adasme, M. F.; Linnemann, K. L.; Bolz, S. N.; Kaiser, F.; Salentin, S.; Haupt, V. J.; Schroeder, M. PLIP 2021: Expanding the Scope of the Protein-Ligand Interaction Profiler to DNA and RNA. *Nucleic Acids Res.* **2021**, 49 (W1), W530–W534.
